# Supplementary material for: Catalytic asymmetric Michael/cyclization reaction of 3-isothiocyanato thiobutyrolactone: an approach to the construction of a library of bispiro[pyrazolone-thiobutyrolactone] skeletons
Source: Royal Society of Chemistry journal article supplement (doi:10.1039/d2ob00773h), 2022-01-01

# Catalytic asymmetric Michael/cyclization of 3-isothiocyanato thiobutyrolactone: an approach to the construction of a library of bispairo[pyrazolone-thiobutyrolactone] skeletons

Ren-Ming Liu<sup>a</sup>, Min Zhang<sup>a</sup>, Xiao-Xue Han<sup>a</sup>, Xiong-Li Liu<sup>a\*</sup>, Bo-Wen Pan<sup>b</sup>, You-Ping Tian<sup>b</sup>, Li-Jun Peng, <sup>a\*</sup> Wei-Cheng Yuan<sup>c</sup>

<sup>a</sup> National & Local Joint Engineering Research Center for the Exploitation of Homology Resources of Southwest Medicine and Food, Guizhou University, Guiyang, Guizhou 550025, P. R. China.

<sup>b</sup> College of Pharmaceutical Sciences, Guizhou University of Traditional Chinese Medicine, Guiyang, 550025, China.

<sup>c</sup> Innovation Research Center of Chiral Drugs, Institute for Advanced Study, School of Pharmacy, Chengdu University, Chengdu 610106, China

\*E-mail address: xlliu1@gzu.edu.cn, ljpeng@gzu.edu.cn

## Table of Contents

|                                                                                                                                |     |
|--------------------------------------------------------------------------------------------------------------------------------|-----|
| Table of contents.....                                                                                                         | S1  |
| 1. General experimental information.....                                                                                       | S2  |
| 2. General procedure for preparation of 3-isothiocyanato thiobutyrolactone <b>1</b> .....                                      | S2  |
| 3. Characterization data of compound <b>1</b> .....                                                                            | S2  |
| 4. Catalytic asymmetric synthesis of bispairo[pyrazolone-thiobutyrolactone] skeletons <b>3</b> .....                           | S3  |
| 5. Characterization data of compounds <b>3</b> .....                                                                           | S3  |
| 6. Preparative scale synthesis of the product <b>3a</b> .....                                                                  | S13 |
| 7. Further investigation of transformation of <b>3q</b> .....                                                                  | S14 |
| 8. X-ray crystal data for compound <b>3k</b> .....                                                                             | S15 |
| 9. The Copies of <sup>1</sup> H NMR, <sup>13</sup> C NMR and HPLC Spectra for Compounds <b>1</b> , <b>3</b> and <b>4</b> ..... | S16 |

## 1. General information

Reactions were monitored by thin layer chromatography using UV light to visualize the course of reaction. Purification of reaction products was carried out by flash chromatography on silica gel or just by simple filtration and washing.  $^1\text{H}$  and  $^{13}\text{C}$ NMR spectra were obtained using a Bruker DPX-400 spectrometer.  $^1\text{H}$  NMR chemical shifts are reported in ppm ( $\delta$ ) relative to tetramethylsilane (TMS) with the solvent resonance employed as the internal standard. Data are reported as follows: chemical shift, multiplicity (s = singlet, d = doublet, t = triplet, m = multiplet), coupling constants (Hz) and integration.  $^{13}\text{C}$  NMR chemical shifts are reported in ppm ( $\delta$ ) from tetramethylsilane (TMS) with the solvent resonance as the internal standard. Melting points were measured on an electrothermal digital melting point apparatus.

## 2. General procedure for preparation of 3-isothiocyanato thiobutyrolactone 1

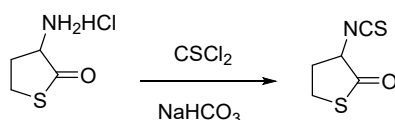

The homocysteinethiolactone hydrochloride (1.53 g, 10.0 mmol) was dissolved in CH<sub>2</sub>Cl<sub>2</sub> (90 mL), and saturated aqueous NaHCO<sub>3</sub> (90 mL) was added at 0 °C. The biphasic mixture was stirred vigorously for 15 min. The stirring was stopped, and thiophosgene (1.71 g, 1.14 mL, 15.0 mmol) was added via syringe to the organic layer. Stirring was immediately restarted, and the reaction was allowed to stir for 2 h at 0 °C. The layers were separated and the aqueous layer was extracted with CH<sub>2</sub>Cl<sub>2</sub> (2×50 mL) and washed with water (50 mL). The combined organics were dried over Na<sub>2</sub>SO<sub>4</sub>, concentrated under vacuum. The residue mixture was purified by flash column chromatography on silica gel to give 3-isothiocyanato thiobutyrolactone 1.

## 3. Characterization data of compound 1

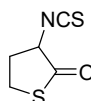

**1:** Light yellow oil; yield 73%, 1.16 g;  $^1\text{H}$  NMR (CDCl<sub>3</sub>, 400 MHz)  $\delta$ : 2.25-2.35 (m, 1H), 2.65-2.72 (m, 1H), 3.34-3.38 (m, 2H), 4.43-4.47 (m, 1H);  $^{13}\text{C}$  NMR (CDCl<sub>3</sub>, 100 MHz)  $\delta$ : 27.5, 31.9, 64.0, 199.8; HRMS (ESI-TOF)  $m/z$ : Calcd. for C<sub>5</sub>H<sub>5</sub>NNaOS<sub>2</sub> [M+Na]<sup>+</sup>: 181.9705; Found: 181.9703.

#### 4. Catalytic asymmetric synthesis of bispiro[pyrazolone-thiobutyrolactone] skeletons 3

In a sealed tube equipped with a magnetic stirring bar, to the mixture of 3-isothiocyanato thiobutyrolactone **1** (0.10 mmol), and squaramide catalyst **C12** (10 mol %) in 1.5 mL of freshly distilled toluene was added alkylidene pyrazolone **2** (0.15 mmol). The reaction mixture was stirred at room temperature for 16 h and was directly loaded onto a silica gel and purified by flash chromatography to give the desired product **3**, using hexane/EtOAc (10/1, v/v) as the eluent.

#### 5. Characterization data of compounds 3

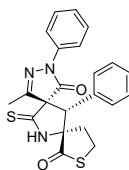

**3a**: Light yellow solid, m.p. 207.9-208.5 °C; yield 87%, 36.6 mg, 93% ee, >20:1 dr,  $[\alpha]_D^{20} = +151.3$  (*c* 2.1, CHCl<sub>3</sub>); The ee was determined by HPLC analysis using a Chiralpak IC column (85/15 hexane/*i*-PrOH; flow rate: 1.0 mL/min;  $\lambda = 254$  nm;  $\tau_{major} = 11.61$  min;  $\tau_{minor} = 7.15$  min); <sup>1</sup>H NMR (CDCl<sub>3</sub>, 400 MHz)  $\delta$ : 2.18 (s, 3H), 2.57-2.65 (m, 1H), 2.72-2.78 (m, 1H), 3.12-3.26 (m, 2H), 4.39 (s, 1H), 7.12-7.16 (m, 1H), 7.19-7.23 (m, 3H), 7.27-7.34 (m, 4H), 7.75 (d, *J* = 8.0 Hz, 2H), 9.50 (br s, 1H); <sup>13</sup>C NMR (CDCl<sub>3</sub>, 100 MHz)  $\delta$ : 11.8, 25.3, 32.5, 51.0, 75.0, 76.7, 117.1, 123.5, 126.6, 127.0, 127.5, 128.1, 135.1, 155.6, 167.1, 193.3, 201.5; HRMS (ESI-TOF) *m/z*: Calcd. for C<sub>22</sub>H<sub>19</sub>N<sub>3</sub>NaO<sub>2</sub>S<sub>2</sub> [M+Na]<sup>+</sup>: 444.0811; Found: 444.0813.

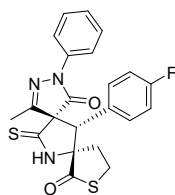

**3b**: Light yellow solid, m.p. 134.2-134.7 °C; yield 85%, 37.3 mg, 91% ee, >20:1 dr,  $[\alpha]_D^{20} = +163.0$  (*c* 2.9, CHCl<sub>3</sub>); The ee was determined by HPLC analysis using a Chiralpak IC column (85/15 hexane/*i*-PrOH; flow rate: 1.0 mL/min;  $\lambda = 254$  nm;  $\tau_{major} = 11.04$  min;  $\tau_{minor} = 6.30$  min); <sup>1</sup>H NMR (CDCl<sub>3</sub>, 400 MHz)  $\delta$ : 2.21 (s, 3H), 2.71-2.79 (m, 2H), 2.89-2.95 (m, 1H), 3.41-3.45 (m, 1H), 4.33 (s, 1H), 7.18-7.27 (m, 3H), 7.42-7.51 (m, 4H), 7.71 (d, *J* = 8.4 Hz, 2H), 11.86 (br s, 1H); <sup>13</sup>C NMR (CDCl<sub>3</sub>, 100 MHz)  $\delta$ : 14.2, 27.6, 35.0, 52.5, 77.4, 79.2, 116.6 (d, *J*<sub>CF</sub> = 22.3 Hz), 119.2, 126.3, 127.2, 127.3, 129.6, 132.4 (d, *J*<sub>CF</sub> = 9.2 Hz), 137.3, 159.2, 163.7 (d, *J*<sub>CF</sub> = 245.1 Hz), 169.4,

194.2, 205.7;  $^{19}\text{F}$  NMR ( $\text{CDCl}_3$ , 470 MHz)  $\delta$ : -111.41; HRMS (ESI-TOF)  $m/z$ : Calcd. for  $\text{C}_{22}\text{H}_{18}\text{FN}_3\text{NaO}_2\text{S}_2$   $[\text{M}+\text{Na}]^+$ : 462.0717; Found: 462.0714.

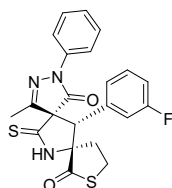

**3c**: Light yellow solid, m.p. 163.2-164.0 °C; yield 84%, 36.9 mg, 98% ee, >20:1 dr,  $[\alpha]_{\text{D}}^{20} = +119.4$  ( $c$  2.9,  $\text{CHCl}_3$ ); The ee was determined by HPLC analysis using a Chiralpak IC column (85/15 hexane/*i*-PrOH; flow rate: 1.0 mL/min;  $\lambda = 254$  nm;  $\tau_{\text{major}} = 8.61$  min;  $\tau_{\text{minor}} = 5.68$  min);  $^1\text{H}$  NMR ( $\text{DMSO-}d_6$ , 400 MHz)  $\delta$ : 2.22 (s, 3H), 2.70-2.82 (m, 2H), 2.90-2.95 (m, 1H), 3.41-3.47 (m, 1H), 4.35 (s, 1H), 7.19-7.30 (m, 4 H), 7.39-7.47 (m, 3H), 7.71 (d,  $J = 7.6$  Hz, 2H), 11.89 (br s, 1H);  $^{13}\text{C}$  NMR ( $\text{DMSO-}d_6$ , 100 MHz)  $\delta$ : 14.2, 27.7, 35.1, 52.6, 77.3, 79.2, 116.8 (d,  $J_{\text{CF}} = 21.4$  Hz), 117.1 (d,  $J_{\text{CF}} = 23.1$  Hz), 119.1, 126.3, 126.4, 129.7, 131.7 (d,  $J_{\text{CF}} = 9.2$  Hz), 133.6 (d,  $J_{\text{CF}} = 8.3$  Hz), 137.3, 159.2, 162.6 (d,  $J_{\text{CF}} = 244.4$  Hz), 170.0, 194.0, 205.5;  $^{19}\text{F}$  NMR ( $\text{CDCl}_3$ , 470 MHz)  $\delta$ : -111.41; HRMS (ESI-TOF)  $m/z$ : Calcd. for  $\text{C}_{22}\text{H}_{18}\text{FN}_3\text{NaO}_2\text{S}_2$   $[\text{M}+\text{Na}]^+$ : 462.0717; Found: 462.0717.

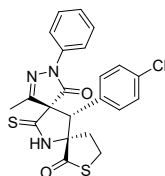

**3d**: Light yellow solid, m.p. 184.5-185.6 °C; yield 85%, 38.7 mg, 99% ee, >20:1 dr,  $[\alpha]_{\text{D}}^{20} = +206.7$  ( $c$  2.9,  $\text{CHCl}_3$ ); The ee was determined by HPLC analysis using a Chiralpak IC column (85/15 hexane/*i*-PrOH; flow rate: 1.0 mL/min;  $\lambda = 254$  nm;  $\tau_{\text{major}} = 11.36$  min;  $\tau_{\text{minor}} = 6.05$  min);  $^1\text{H}$  NMR ( $\text{DMSO-}d_6$ , 400 MHz)  $\delta$ : 2.21 (s, 3H), 2.70-2.82 (m, 2H), 2.89-2.95 (m, 1H), 3.41-3.47 (m, 1H), 4.32 (s, 1H), 7.23-7.27 (m, 1H), 7.42-7.47 (m, 6H), 7.70-7.73 (m, 2H), 11.88 (br s, 1H);  $^{13}\text{C}$  NMR ( $\text{DMSO-}d_6$ , 100 MHz)  $\delta$ : 14.2, 27.7, 35.0, 52.5, 77.3, 79.2, 119.3, 126.3, 129.6, 129.7, 130.0, 132.1, 134.7, 137.3, 159.1, 169.6, 194.1, 205.6; HRMS (ESI-TOF)  $m/z$ : Calcd. for  $\text{C}_{22}\text{H}_{18}\text{ClN}_3\text{NaO}_2\text{S}_2$   $[\text{M}+\text{Na}]^+$ : 478.0421; Found: 478.0424.

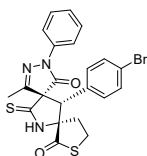

**3e:** Light yellow solid, m.p. 130.2-130.8 °C; yield 86%, 42.9 mg, >99% ee, >20:1 dr,  $[\alpha]_D^{20} = +146.1$  (*c* 2.9, CHCl<sub>3</sub>); The ee was determined by HPLC analysis using a Chiralpak IC column (85/15 hexane/*i*-PrOH; flow rate: 1.0 mL/min;  $\lambda = 254$  nm;  $\tau_{major} = 12.13$  min;  $\tau_{minor} = 6.16$  min); <sup>1</sup>H NMR (CDCl<sub>3</sub>, 400 MHz)  $\delta$ : 2.21 (s, 3H), 2.69-2.82 (m, 2H), 2.89-2.95 (m, 1H), 3.40-3.46 (m, 1H), 4.30 (s, 1H), 7.23-7.27 (m, 1H), 7.38-7.46 (m, 4H), 7.56 (d, *J* = 8.4 Hz, 2H), 7.71 (d, *J* = 8.4 Hz, 2H), 11.88 (br s, 1H); <sup>13</sup>C NMR (CDCl<sub>3</sub>, 100 MHz)  $\delta$ : 14.2, 27.7, 35.0, 52.6, 77.2, 79.1, 119.3, 123.4, 126.3, 129.6, 130.4, 132.4, 132.6, 137.3, 159.1, 169.6, 194.1, 205.6; HRMS (ESI-TOF) *m/z*: Calcd. for C<sub>22</sub>H<sub>18</sub>BrN<sub>3</sub>NaO<sub>2</sub>S<sub>2</sub> [M+Na]<sup>+</sup>: 521.9916; Found: 521.9914.

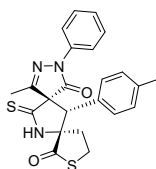

**3f:** Light yellow solid, m.p. 179.2-179.9 °C; yield 82%, 35.7 mg, 93% ee, >20:1 dr,  $[\alpha]_D^{20} = +229.6$  (*c* 2.5, CHCl<sub>3</sub>); The ee was determined by HPLC analysis using a Chiralpak IC column (85/15 hexane/*i*-PrOH; flow rate: 1.0 mL/min;  $\lambda = 254$  nm;  $\tau_{major} = 13.71$  min;  $\tau_{minor} = 7.51$  min); <sup>1</sup>H NMR (DMSO-*d*<sub>6</sub>, 400 MHz)  $\delta$ : 2.19 (s, 3H), 2.20 (s, 3H), 2.69-2.82 (m, 2H), 2.89-2.93 (m, 1H), 3.38-3.40 (m, 1H), 4.26 (s, 1H), 7.11-7.14 (m, 2H), 7.21-7.25 (m, 1H), 7.29 (d, *J* = 8.0 Hz, 2H), 7.41-7.45 (m, 2H), 7.74-7.76 (m, 2H), 11.83 (br s, 1H); <sup>13</sup>C NMR (DMSO-*d*<sub>6</sub>, 100 MHz)  $\delta$ : 14.2, 21.0, 27.6, 35.1, 53.4, 77.4, 79.2, 119.0, 126.1, 127.9, 129.6, 130.0, 130.2, 137.4, 139.3, 159.1, 169.8, 194.4, 206.0; HRMS (ESI-TOF) *m/z*: Calcd. for C<sub>23</sub>H<sub>21</sub>N<sub>3</sub>NaO<sub>2</sub>S<sub>2</sub> [M+Na]<sup>+</sup>: 458.0967; Found: 458.0962.

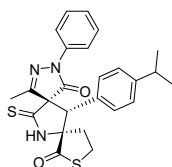

**3g:** Light yellow solid, m.p. 184.2-185.1 °C; yield 90%, 41.7 mg, 93% ee, >20:1 dr,  $[\alpha]_D^{20} = +289.1$  (*c* 2.2, CHCl<sub>3</sub>); The ee was determined by HPLC analysis using a Chiralpak IC column (85/15 hexane/*i*-PrOH; flow rate: 1.0 mL/min;  $\lambda = 254$  nm;  $\tau_{major} = 10.45$  min;  $\tau_{minor} = 6.73$  min);

<sup>1</sup>H NMR (DMSO-*d*<sub>6</sub>, 400 MHz)  $\delta$ : 1.09-1.11 (m, 6H), 2.19 (s, 3H), 2.67-2.83 (m, 3H), 2.90-2.94 (m, 1H), 4.30 (s, 1H), 7.19-7.31 (m, 5H), 7.42-7.46 (m, 2H), 7.74 (d, *J* = 7.6 Hz, 2H), 11.84 (br s, 1H); <sup>13</sup>C NMR (DMSO-*d*<sub>6</sub>, 100 MHz)  $\delta$ : 14.2, 23.9, 24.1, 27.6, 33.4, 35.2, 53.2, 77.3, 79.2, 119.1, 126.1, 127.6, 128.4, 129.6, 130.0, 137.5, 149.8, 159.2, 169.8, 194.4, 205.9; HRMS (ESI-TOF) *m/z*: Calcd. for C<sub>25</sub>H<sub>25</sub>N<sub>3</sub>NaO<sub>2</sub>S<sub>2</sub> [M+Na]<sup>+</sup>: 486.1280; Found: 486.1277.

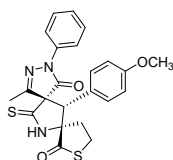

**3h**: Light yellow solid, m.p. 201.3-201.7 °C; yield 82%, 37.0 mg, 96% ee, 12:1 dr, [ $\alpha$ ]<sub>D</sub><sup>20</sup> = +377.4 (*c* 2.8, CHCl<sub>3</sub>); The ee was determined by HPLC analysis using a Chiralpak IC column (85/15 hexane/*i*-PrOH; flow rate: 1.0 mL/min;  $\lambda$  = 254 nm;  $\tau_{major}$  = 16.70 min;  $\tau_{minor}$  = 9.21 min); <sup>1</sup>H NMR (CDCl<sub>3</sub>, 400 MHz)  $\delta$ : 2.17 (s, 3H), 2.57-2.65 (m, 1H), 2.71-2.77 (m, 1H), 3.09-3.15 (m, 1H), 3.18-3.24 (m, 1H), 3.65 (s, 3H), 4.33 (s, 1H), 6.70 (d, *J* = 8.8 Hz, 2H), 7.11-7.15 (m, 1H), 7.20 (d, *J* = 8.8 Hz, 2H), 7.30-7.34 (m, 2H), 7.75-7.77 (m, 2H), 9.77 (br s, 1H); <sup>13</sup>C NMR (CDCl<sub>3</sub>, 100 MHz)  $\delta$ : 13.1, 26.6, 33.8, 51.8, 54.2, 75.6, 78.0, 113.6, 118.4, 121.1, 124.8, 127.9, 130.1, 136.4, 157.0, 159.1, 168.4, 194.7, 203.0; HRMS (ESI-TOF) *m/z*: Calcd. for C<sub>23</sub>H<sub>21</sub>N<sub>3</sub>NaO<sub>3</sub>S<sub>2</sub> [M+Na]<sup>+</sup>: 474.0917; Found: 474.0914.

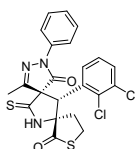

**3i**: Light yellow solid, m.p. 179.8-179.9 °C; yield 90%, 44.0 mg, 87% ee, >20:1 dr, [ $\alpha$ ]<sub>D</sub><sup>20</sup> = +484.1 (*c* 2.3, CHCl<sub>3</sub>); The ee was determined by HPLC analysis using a Chiralpak IC column (85/15 hexane/*i*-PrOH; flow rate: 1.0 mL/min;  $\lambda$  = 254 nm;  $\tau_{major}$  = 23.33 min;  $\tau_{minor}$  = 8.51 min); <sup>1</sup>H NMR (DMSO-*d*<sub>6</sub>, 400 MHz)  $\delta$ : 2.24 (s, 3H), 2.60-2.67 (m, 1H), 2.80-2.87 (m, 1H), 2.89-2.94 (m, 1H), 3.40-3.43 (m, 1H), 5.17 (s, 1H), 7.22-7.26 (m, 1H), 7.39-7.44 (m, 3H), 7.64-7.69 (m, 3H), 7.87 (d, *J* = 7.2 Hz, 1H), 11.92 (br s, 1H); <sup>13</sup>C NMR (DMSO-*d*<sub>6</sub>, 100 MHz)  $\delta$ : 14.4, 27.7, 34.7, 47.9, 77.7, 79.0, 119.3, 126.4, 129.0, 129.6, 130.0, 130.8, 132.2, 133.3, 133.4, 137.1, 158.8, 169.3, 193.6, 205.4; HRMS (ESI-TOF) *m/z*: Calcd. for C<sub>22</sub>H<sub>17</sub>Cl<sub>2</sub>N<sub>3</sub>NaO<sub>2</sub>S<sub>2</sub> [M+Na]<sup>+</sup>: 512.0031; Found: 512.0027.

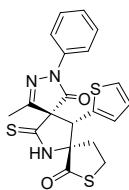

**3j:** Light yellow solid, m.p. 161.5-161.8 °C; yield 84%, 35.9 mg, 96% ee, >20:1 dr,  $[\alpha]_{\text{D}}^{20} = +192.2$  (*c* 2.4, CHCl<sub>3</sub>); The ee was determined by HPLC analysis using a Chiralpak IC column (85/15 hexane/*i*-PrOH; flow rate: 1.0 mL/min;  $\lambda = 254$  nm;  $\tau_{\text{major}} = 13.38$  min;  $\tau_{\text{minor}} = 7.70$  min); <sup>1</sup>H NMR (DMSO-*d*<sub>6</sub>, 400 MHz)  $\delta$ : 2.19 (s, 3H), 2.58-2.64 (m, 1H), 2.78-2.85 (m, 1H), 2.89-2.94 (m, 1H), 3.38-3.41 (m, 1H), 4.67 (s, 1H), 7.00-7.02 (m, 1H), 7.17 (d, *J* = 3.2 Hz, 1H), 7.23-7.27 (m, 1H), 7.44-7.48 (m, 2H), 7.56 (d, *J* = 4.8 Hz, 1H), 7.77 (d, *J* = 7.6 Hz, 2H), 11.81 (br s, 1H); <sup>13</sup>C NMR (DMSO-*d*<sub>6</sub>, 100 MHz)  $\delta$ : 14.1, 27.4, 35.1, 49.2, 77.3, 79.2, 118.9, 126.1, 127.8, 129.0, 129.6, 130.7, 131.8, 137.5, 158.8, 169.3, 193.8, 205.9; HRMS (ESI-TOF) *m/z*: Calcd. for C<sub>20</sub>H<sub>17</sub>N<sub>3</sub>NaO<sub>2</sub>S<sub>3</sub> [M+Na]<sup>+</sup>: 450.0375; Found: 450.0378.

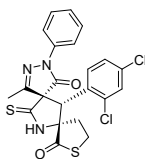

**3k:** Light yellow solid, m.p. 262.1-263.1 °C; yield 82%, 40.1 mg, 97% ee, >20:1 dr,  $[\alpha]_{\text{D}}^{20} = +54.2$  (*c* 2.9, CHCl<sub>3</sub>); The ee was determined by HPLC analysis using a Chiralpak IC column (85/15 hexane/*i*-PrOH; flow rate: 1.0 mL/min;  $\lambda = 254$  nm;  $\tau_{\text{major}} = 12.07$  min;  $\tau_{\text{minor}} = 6.65$  min); <sup>1</sup>H NMR (DMSO-*d*<sub>6</sub>, 400 MHz)  $\delta$ : 2.23 (s, 3H), 2.62-2.68 (m, 1H), 2.80-2.86 (m, 1H), 2.89-2.94 (m, 1H), 3.39-3.44 (m, 1H), 5.04 (s, 1H), 7.23-7.27 (m, 1H), 7.42-7.46 (m, 2H), 7.50-7.52 (m, 1H), 7.68-7.73 (m, 3H), 7.88 (d, *J* = 8.4 Hz, 1H), 11.91 (br s, 1H); <sup>13</sup>C NMR (DMSO-*d*<sub>6</sub>, 100 MHz)  $\delta$ : 14.3, 27.7, 34.7, 46.6, 77.6, 78.9, 119.4, 126.4, 127.3, 128.6, 129.6, 130.4, 132.6, 135.5, 136.2, 137.1, 158.8, 169.3, 193.6, 205.4; HRMS (ESI-TOF) *m/z*: Calcd. for C<sub>22</sub>H<sub>17</sub>Cl<sub>2</sub>N<sub>3</sub>NaO<sub>2</sub>S<sub>2</sub> [M+Na]<sup>+</sup>: 512.0031; Found: 512.0035.

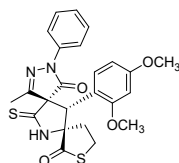

**3l:** Light yellow solid, m.p. 170.3-171.3 °C; yield 84%, 40.4 mg, 97% ee, >20:1 dr,  $[\alpha]_{\text{D}}^{20} =$

+250.5 (*c* 2.9, CHCl<sub>3</sub>); The ee was determined by HPLC analysis using a Chiralpak IC column (85/15 hexane/*i*-PrOH; flow rate: 1.0 mL/min;  $\lambda = 254$  nm;  $\tau_{major} = 38.14$  min;  $\tau_{minor} = 13.75$  min); <sup>1</sup>H NMR (DMSO-*d*<sub>6</sub>, 400 MHz)  $\delta$ : 2.12 (s, 3H), 2.45-2.51 (m, 1H), 2.65-2.72 (m, 1H), 2.97-3.04 (m, 1H), 3.24-3.30 (m, 1H), 3.70 (s, 3H), 3.75 (s, 3H), 4.89 (s, 1H), 6.48-6.50 (m, 1H), 6.58 (s, 1H), 7.22-7.26 (m, 1H), 7.43-7.45 (m, 3H), 7.74 (d, *J* = 8.0 Hz, 2H), 11.66 (br s, 1H); <sup>13</sup>C NMR (DMSO-*d*<sub>6</sub>, 100 MHz)  $\delta$ : 14.0, 27.2, 34.6, 43.9, 55.7, 56.5, 77.4, 78.8, 99.3, 106.0, 110.7, 119.1, 126.1, 129.6, 130.1, 137.5, 159.2, 161.3, 170.1, 194.4, 206.0; HRMS (ESI-TOF) *m/z*: Calcd. for C<sub>24</sub>H<sub>23</sub>N<sub>3</sub>NaO<sub>4</sub>S<sub>2</sub> [M+Na]<sup>+</sup>: 504.1022; Found: 504.1025.

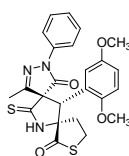

**3m**: Light yellow solid, m.p. 175.4-176.0 °C; yield 80%, 38.5 mg, 96% ee, >20:1 dr,  $[\alpha]_D^{20} = +134.5$  (*c* 2.9, CHCl<sub>3</sub>); The ee was determined by HPLC analysis using a Chiralpak IC column (85/15 hexane/*i*-PrOH; flow rate: 1.0 mL/min;  $\lambda = 254$  nm;  $\tau_{major} = 16.53$  min;  $\tau_{minor} = 9.06$  min); <sup>1</sup>H NMR (DMSO-*d*<sub>6</sub>, 400 MHz)  $\delta$ : 2.12 (s, 3H), 2.53-2.56 (m, 1H), 2.68-2.75 (m, 1H), 2.92-2.98 (m, 1H), 3.28-3.32 (m, 1H), 3.35 (s, 3H), 3.51 (s, 3H), 3.70 (s, 3H), 4.94 (s, 1H), 6.88-6.91 (m, 1H), 7.00 (d, *J* = 8.8 Hz, 1H), 7.06 (d, *J* = 2.8 Hz, 1H), 7.23-7.27 (m, 1H), 7.43-7.47 (m, 2H), 7.75 (d, *J* = 8.0 Hz, 2H), 11.73 (br s, 1H); <sup>13</sup>C NMR (DMSO-*d*<sub>6</sub>, 100 MHz)  $\delta$ : 14.1, 27.3, 34.6, 44.3, 55.7, 56.8, 77.4, 78.8, 113.5, 115.1, 115.5, 118.8, 119.8, 126.1, 129.7, 137.5, 152.0, 153.3, 159.3, 170.1, 194.1, 205.6; HRMS (ESI-TOF) *m/z*: Calcd. for C<sub>24</sub>H<sub>23</sub>N<sub>3</sub>NaO<sub>4</sub>S<sub>2</sub> [M+Na]<sup>+</sup>: 504.1022; Found: 504.1023.

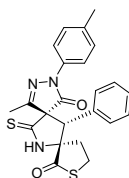

**3n**: Light yellow solid, m.p. 162.3-162.8 °C; yield 86%, 37.4 mg, >99% ee, >20:1 dr,  $[\alpha]_D^{20} = +356.9$  (*c* 2.9, CHCl<sub>3</sub>); The ee was determined by HPLC analysis using a Chiralpak IC column (85/15 hexane/*i*-PrOH; flow rate: 1.0 mL/min;  $\lambda = 254$  nm;  $\tau_{major} = 14.82$  min;  $\tau_{minor} = 7.80$  min); <sup>1</sup>H NMR (DMSO-*d*<sub>6</sub>, 400 MHz)  $\delta$ : 2.19 (s, 3H), 2.29 (s, 3H), 2.70-2.80 (m, 2H), 2.80-2.95 (m,



1H), 3.39-3.41 (m, 1H), 4.29 (s, 1H), 7.23 (d,  $J = 8.4$  Hz, 2H), 7.32-7.34 (m, 3H), 7.39-7.42 (m, 2H), 7.59 (d,  $J = 8.4$  Hz, 2H), 11.84 (br s, 1H);  $^{13}\text{C}$  NMR (DMSO- $d_6$ , 100 MHz)  $\delta$ : 14.2, 21.0, 27.6, 35.1, 53.6, 77.2, 79.2, 119.2, 129.6, 129.7, 130.0, 130.1, 131.1, 135.0, 135.5, 158.9, 169.6, 194.5, 205.9; HRMS (ESI-TOF)  $m/z$ : Calcd. for  $\text{C}_{23}\text{H}_{21}\text{N}_3\text{NaO}_2\text{S}_2$   $[\text{M}+\text{Na}]^+$ : 458.0967; Found: 458.0965.

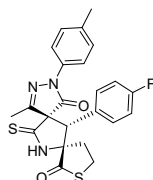

**30**: Light yellow solid, m.p. 132.3-132.8 °C; yield 87%, 39.4 mg, 96% ee, >20:1 dr,  $[\alpha]_{\text{D}}^{20} = +267.8$  ( $c$  2.7,  $\text{CHCl}_3$ ); The ee was determined by HPLC analysis using a Chiralpak IC column (85/15 hexane/*i*-PrOH; flow rate: 1.0 mL/min;  $\lambda = 254$  nm;  $\tau_{\text{major}} = 13.75$  min;  $\tau_{\text{minor}} = 6.64$  min);  $^1\text{H}$  NMR (DMSO- $d_6$ , 400 MHz)  $\delta$ : 2.20 (s, 3H), 2.29 (s, 3H), 2.72-2.79 (m, 2H), 2.89-2.93 (m, 1H), 3.41-3.45 (m, 1H), 4.31 (s, 1H), 7.17-7.24 (m, 4H), 7.47-7.50 (m, 2H), 7.58 (d,  $J = 8.4$  Hz, 2H), 11.84 (br s, 1H);  $^{13}\text{C}$  NMR (DMSO- $d_6$ , 100 MHz)  $\delta$ : 14.2, 21.0, 27.6, 35.0, 52.5, 77.3, 79.2, 116.5 (d,  $J_{\text{CF}} = 22.4$  Hz), 119.3, 127.3 (d,  $J_{\text{CF}} = 7.1$  Hz), 130.0, 132.4 (d,  $J_{\text{CF}} = 8.4$  Hz), 134.9, 135.6, 158.9, 162.8 (d,  $J_{\text{CF}} = 245.2$  Hz), 169.4, 194.3, 205.7;  $^{19}\text{F}$  NMR ( $\text{CDCl}_3$ , 470 MHz)  $\delta$ : -112.25; HRMS (ESI-TOF)  $m/z$ : Calcd. for  $\text{C}_{23}\text{H}_{20}\text{FN}_3\text{NaO}_2\text{S}_2$   $[\text{M}+\text{Na}]^+$ : 476.0873; Found: 476.0877.

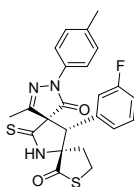

**3p**: Light yellow solid, m.p. 187.2-187.7 °C; yield 80%, 36.2 mg, 91% ee, >20:1 dr,  $[\alpha]_{\text{D}}^{20} = +9.3$  ( $c$  2.9,  $\text{CHCl}_3$ ); The ee was determined by HPLC analysis using a Chiralpak IC column (85/15 hexane/*i*-PrOH; flow rate: 1.0 mL/min;  $\lambda = 254$  nm;  $\tau_{\text{major}} = 10.55$  min;  $\tau_{\text{minor}} = 5.94$  min);  $^1\text{H}$  NMR (DMSO- $d_6$ , 400 MHz)  $\delta$ : 2.24 (s, 3H), 2.31 (s, 3H), 2.73-2.85 (m, 2H), 2.94-2.99 (m, 1H), 3.44-3.49 (m, 1H), 4.38 (s, 1H), 7.20-7.32 (m, 5H), 7.40-7.43 (m, 1H), 7.62 (d,  $J = 8.4$  Hz, 2H), 11.92 (br s, 1H);  $^{13}\text{C}$  NMR (DMSO- $d_6$ , 100 MHz)  $\delta$ : 14.2, 20.9, 27.7, 35.1, 52.6, 77.2, 79.2, 116.7 (d,  $J_{\text{CF}} = 20.4$  Hz), 117.1 (d,  $J_{\text{CF}} = 23.1$  Hz), 119.1, 126.4, 130.0, 131.7, 133.6, 134.9, 135.6,

159.0, 162.7 (d,  $J_{CF} = 245.0$  Hz), 169.5, 194.2, 205.5;  $^{19}\text{F}$  NMR ( $\text{CDCl}_3$ , 470 MHz)  $\delta$ : -111.45; HRMS (ESI-TOF)  $m/z$ : Calcd. for  $\text{C}_{23}\text{H}_{20}\text{FN}_3\text{NaO}_2\text{S}_2$   $[\text{M}+\text{Na}]^+$ : 476.0873; Found: 476.0873.

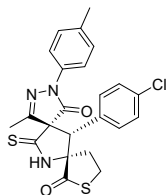

**3q**: Light yellow solid, m.p. 187.7-188.1 °C; yield 86%, 40.3 mg, >99% ee, >20:1 dr,  $[\alpha]_{\text{D}}^{20} = +299.4$  ( $c$  2.9,  $\text{CHCl}_3$ ); The ee was determined by HPLC analysis using a Chiralpak IC column (85/15 hexane/*i*-PrOH; flow rate: 1.0 mL/min;  $\lambda = 254$  nm;  $\tau_{\text{major}} = 15.15$  min;  $\tau_{\text{minor}} = 6.37$  min);  $^1\text{H}$  NMR ( $\text{DMSO-}d_6$ , 400 MHz)  $\delta$ : 2.20 (s, 3H), 2.28 (s, 3H), 2.69-2.81 (m, 2H), 2.90-2.95 (m, 1H), 3.41-3.46 (m, 1H), 4.31 (s, 1H), 7.22 (d,  $J = 8.4$  Hz, 2H), 7.40-7.46 (m, 4H), 7.59 (d,  $J = 8.4$  Hz, 2H), 11.86 (br s, 1H);  $^{13}\text{C}$  NMR ( $\text{DMSO-}d_6$ , 100 MHz)  $\delta$ : 14.2, 21.0, 27.7, 35.0, 52.6, 72.2, 79.2, 119.3, 129.7, 130.0, 130.1, 132.1, 134.7, 134.9, 135.6, 158.9, 169.4, 194.2, 205.6; HRMS (ESI-TOF)  $m/z$ : Calcd. for  $\text{C}_{23}\text{H}_{20}\text{ClN}_3\text{NaO}_2\text{S}_2$   $[\text{M}+\text{Na}]^+$ : 492.0578; Found: 492.0577.

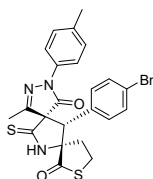

**3r**: Light yellow solid, m.p. 148.3-149.1 °C; yield 80%, 41.0 mg, 93% ee, >20:1 dr,  $[\alpha]_{\text{D}}^{20} = +225.9$  ( $c$  2.1,  $\text{CHCl}_3$ ); The ee was determined by HPLC analysis using a Chiralpak IC column (85/15 hexane/*i*-PrOH; flow rate: 1.0 mL/min;  $\lambda = 254$  nm;  $\tau_{\text{major}} = 18.14$  min;  $\tau_{\text{minor}} = 8.12$  min);  $^1\text{H}$  NMR ( $\text{DMSO-}d_6$ , 400 MHz)  $\delta$ : 2.12 (s, 3H), 2.23 (s, 3H), 2.62-2.75 (m, 2H), 2.81-2.87 (m, 1H), 3.33-3.39 (m, 1H), 4.21 (s, 1H), 7.16 (d,  $J = 8.4$  Hz, 2H), 7.30 (d,  $J = 8.4$  Hz, 2H), 7.48-7.52 (m, 4H), 11.79 (br s, 1H);  $^{13}\text{C}$  NMR ( $\text{DMSO-}d_6$ , 100 MHz)  $\delta$ : 14.2, 21.0, 27.7, 35.0, 52.6, 77.1, 79.1, 119.3, 123.4, 130.0, 130.4, 132.4, 132.6, 134.9, 135.6, 158.9, 169.4, 194.2, 205.6; HRMS (ESI-TOF)  $m/z$ : Calcd. for  $\text{C}_{23}\text{H}_{20}\text{BrN}_3\text{NaO}_2\text{S}_2$   $[\text{M}+\text{Na}]^+$ : 536.0073; Found: 536.0074.

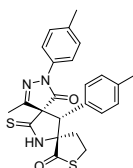

**3s:** Light yellow solid, m.p. 164.5-165.3 °C; yield 90%, 40.4 mg, 93% ee, >20:1 dr,  $[\alpha]_{\text{D}}^{20} = +272.4$  (*c* 2.0, CHCl<sub>3</sub>); The ee was determined by HPLC analysis using a Chiralpak IC column (80/20 hexane/*i*-PrOH; flow rate: 1.0 mL/min;  $\lambda = 254$  nm;  $\tau_{\text{major}} = 9.68$  min;  $\tau_{\text{minor}} = 5.79$  min); <sup>1</sup>H NMR (CDCl<sub>3</sub>, 400 MHz)  $\delta$ : 2.16 (s, 3H), 2.19 (s, 3H), 2.26 (s, 3H), 2.55-2.63 (m, 1H), 2.69-2.74 (m, 1H), 3.10-3.24 (m, 2H), 4.34 (s, 1H), 6.98 (d, *J* = 8.0 Hz, 2H), 7.10-7.17 (m, 4H), 7.61 (d, *J* = 8.4 Hz, 2H), 9.76 (br s, 1H); <sup>13</sup>C NMR (CDCl<sub>3</sub>, 100 MHz)  $\delta$ : 14.1, 21.0, 26.9, 27.7, 34.9, 53.1, 77.4, 79.1, 119.5, 127.4, 129.4, 129.7, 130.0, 135.0, 135.6, 139.3, 157.8, 169.3, 195.9, 204.0; HRMS (ESI-TOF) *m/z*: Calcd. for C<sub>24</sub>H<sub>23</sub>N<sub>3</sub>NaO<sub>2</sub>S<sub>2</sub> [M+Na]<sup>+</sup>: 472.1124; Found: 472.1121.

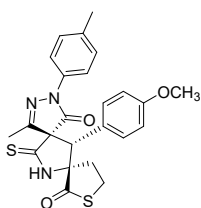

**3t:** Light yellow solid, m.p. 165.3-165.9 °C; yield 90%, 41.9 mg, 95% ee, >20:1 dr,  $[\alpha]_{\text{D}}^{20} = +346.1$  (*c* 2.8, CHCl<sub>3</sub>); The ee was determined by HPLC analysis using a Chiralpak IC column (85/15 hexane/*i*-PrOH; flow rate: 1.0 mL/min;  $\lambda = 254$  nm;  $\tau_{\text{major}} = 22.75$  min;  $\tau_{\text{minor}} = 9.84$  min); <sup>1</sup>H NMR (DMSO-*d*<sub>6</sub>, 400 MHz)  $\delta$ : 2.18 (s, 3H), 2.29 (s, 3H), 2.69-2.74 (m, 1H), 2.78-2.83 (m, 1H), 2.86-2.91 (m, 1H), 3.39-3.41 (m, 1H), 3.68 (s, 3H), 4.23 (s, 1H), 6.87 (d, *J* = 8.4 Hz, 2H), 7.23 (d, *J* = 8.4 Hz, 2H), 7.34 (d, *J* = 8.8 Hz, 2H), 7.60 (d, *J* = 8.4 Hz, 2H), 11.78 (br s, 1H); <sup>13</sup>C NMR (DMSO-*d*<sub>6</sub>, 100 MHz)  $\delta$ : 14.2, 21.0, 27.5, 35.0, 53.1, 55.5, 77.4, 79.2, 114.9, 119.1, 122.6, 130.0, 131.4, 135.1, 135.4, 159.0, 160.2, 169.6, 194.6, 206.1; HRMS (ESI-TOF) *m/z*: Calcd. for C<sub>24</sub>H<sub>23</sub>N<sub>3</sub>NaO<sub>3</sub>S<sub>2</sub> [M+Na]<sup>+</sup>: 488.1073; Found: 488.1073.

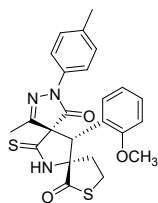

**3u:** Light yellow solid, m.p. 210.3-210.9 °C; yield 89%, 41.4 mg, 94% ee, >20:1 dr,  $[\alpha]_{\text{D}}^{20} = +269.9$  (*c* 2.9, CHCl<sub>3</sub>); The ee was determined by HPLC analysis using a Chiralpak IC column (85/15 hexane/*i*-PrOH; flow rate: 1.0 mL/min;  $\lambda = 254$  nm;  $\tau_{\text{major}} = 22.68$  min;  $\tau_{\text{minor}} = 10.65$  min); <sup>1</sup>H NMR (DMSO-*d*<sub>6</sub>, 400 MHz)  $\delta$ : 2.13 (s, 3H), 2.44-2.50 (m, 1H), 2.68-2.75 (m, 1H), 2.94-3.00 (m, 1H), 3.25-3.31 (m, 1H), 3.36 (s, 3H), 3.75 (s, 3H), 4.99 (s, 3H), 6.88-6.92 (m, 1H), 7.05 (d, *J*

= 8.4 Hz, 1H), 7.22-7.26 (m, 1H), 7.29-7.33 (m, 1H), 7.42-7.46 (m, 2H), 7.51 (d,  $J = 7.6$  Hz, 1H), 7.72 (d,  $J = 7.6$  Hz, 2H), 11.72 (br s, 1H);  $^{13}\text{C}$  NMR (DMSO- $d_6$ , 100 MHz)  $\delta$ : 14.1, 27.2, 34.6, 44.1, 56.3, 77.3, 78.9, 112.4, 118.9, 119.1, 121.1, 126.1, 129.3, 129.6, 130.8, 137.4, 158.0, 159.2, 170.1, 194.3, 205.8; HRMS (ESI-TOF)  $m/z$ : Calcd. for  $\text{C}_{24}\text{H}_{23}\text{N}_3\text{NaO}_3\text{S}_2$   $[\text{M}+\text{Na}]^+$ : 488.1073; Found: 488.1077.

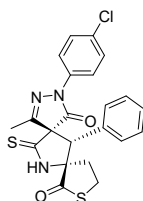

**3v**: Light yellow solid, m.p. 193.2-193.9 °C; yield 83%, 37.8 mg, 98% ee, >20:1 dr,  $[\alpha]_{\text{D}}^{20} = +83.8$  ( $c$  2.9,  $\text{CHCl}_3$ ); The ee was determined by HPLC analysis using a Chiralpak IC column (85/15 hexane/*i*-PrOH; flow rate: 1.0 mL/min;  $\lambda = 254$  nm;  $\tau_{\text{major}} = 9.61$  min;  $\tau_{\text{minor}} = 6.10$  min);  $^1\text{H}$  NMR (DMSO- $d_6$ , 400 MHz)  $\delta$ : 2.20 (s, 3 H), 2.73-2.79 (m, 2H), 2.87-2.94 (m, 1H), 3.39-3.42 (m, 1H), 4.30 (s, 1H), 7.33-7.39 (m, 5H), 7.50 (d,  $J = 8.8$  Hz, 2H), 7.76 (d,  $J = 8.8$  Hz, 2H), 11.88 (br s, 1H);  $^{13}\text{C}$  NMR (DMSO- $d_6$ , 100 MHz)  $\delta$ : 14.2, 27.6, 35.1, 53.5, 77.4, 79.3, 120.5, 129.0, 129.7, 129.8, 129.9, 130.0, 130.1, 130.9, 136.2, 159.6, 169.8, 194.1, 205.8; HRMS (ESI-TOF)  $m/z$ : Calcd. for  $\text{C}_{22}\text{H}_{18}\text{ClN}_3\text{NaO}_2\text{S}_2$   $[\text{M}+\text{Na}]^+$ : 478.0421; Found: 478.0418.

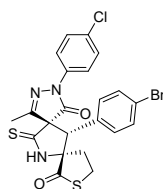

**3w**: Light yellow solid, m.p. 130.2-131.1 °C; yield 82%, 43.7 mg, 91% ee, 13:1 dr,  $[\alpha]_{\text{D}}^{20} = +94.9$  ( $c$  2.9,  $\text{CHCl}_3$ ); The ee was determined by HPLC analysis using a Chiralpak IC column (85/15 hexane/*i*-PrOH; flow rate: 1.0 mL/min;  $\lambda = 254$  nm;  $\tau_{\text{major}} = 9.83$  min;  $\tau_{\text{minor}} = 5.37$  min);  $^1\text{H}$  NMR (DMSO- $d_6$ , 400 MHz)  $\delta$ : 2.21 (s, 3H), 2.69-2.74 (m, 1H), 2.77-2.83 (m, 1H), 2.87-2.94 (m, 1H), 3.40-3.46 (m, 1H), 4.30 (s, 1H), 7.36 (d,  $J = 8.4$  Hz, 2H), 7.50 (d,  $J = 9.2$  Hz, 2H), 7.55 (d,  $J = 8.8$  Hz, 2H), 7.75 (d,  $J = 8.8$  Hz, 2H), 11.90 (br s, 1H);  $^{13}\text{C}$  NMR (DMSO- $d_6$ , 100 MHz)  $\delta$ : 14.2, 27.7, 35.0, 52.6, 77.3, 79.2, 120.7, 123.4, 129.7, 130.1, 130.3, 132.3, 132.7, 136.0, 159.6, 169.6, 193.8, 205.5; HRMS (ESI-TOF)  $m/z$ : Calcd. for  $\text{C}_{22}\text{H}_{17}\text{BrClN}_3\text{NaO}_2\text{S}_2$   $[\text{M}+\text{Na}]^+$ : 555.9526; Found: 555.9522.

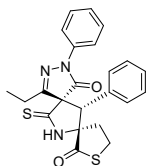

**3x:** Light yellow solid, m.p. 178.9-179.5 °C; yield 87%, 37.8 mg, 86% ee, >20:1 dr; The ee was determined by HPLC analysis using a Chiralpak IC column (85/15 hexane/*i*-PrOH; flow rate: 1.0 mL/min;  $\lambda = 254$  nm;  $\tau_{major} = 7.69$  min;  $\tau_{minor} = 5.74$  min);  $^1\text{H NMR}$  (DMSO- $d_6$ , 400 MHz)  $\delta$ : 1.18-1.22 (m, 3H), 2.48-2.64 (m, 2H), 2.70-2.78 (m, 2H), 2.88-2.95 (m, 1H), 3.42-3.44 (m, 1H), 4.32 (s, 1H), 7.22-7.25 (m, 1H), 7.33-7.46 (m, 7H), 7.75 (d,  $J = 8.0$  Hz, 2H), 11.85 (br s, 1H);  $^{13}\text{C NMR}$  (DMSO- $d_6$ , 100 MHz)  $\delta$ : 9.6, 21.6, 27.6, 35.1, 53.5, 77.5, 79.3, 119.1, 126.2, 129.6, 129.7, 130.1, 131.1, 137.5, 162.6, 169.9, 194.7, 206.0; HRMS (ESI-TOF)  $m/z$ : Calcd. for  $\text{C}_{23}\text{H}_{21}\text{N}_3\text{NaO}_2\text{S}_2$   $[\text{M}+\text{Na}]^+$ : 458.0967; Found: 458.0962.

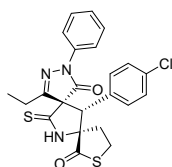

**3y:** Light yellow solid, m.p. 184.3-184.6 °C; yield 90%, 42.2 mg, 98% ee, >20:1 dr; The ee was determined by HPLC analysis using a Chiralpak IC column (85/15 hexane/*i*-PrOH; flow rate: 1.0 mL/min;  $\lambda = 254$  nm;  $\tau_{major} = 7.42$  min;  $\tau_{minor} = 4.95$  min);  $^1\text{H NMR}$  (DMSO- $d_6$ , 400 MHz)  $\delta$ : 1.18-1.22 (m, 3H), 2.47-2.54 (m, 1H), 2.59-2.65 (m, 1H), 2.67-2.73 (m, 1H), 2.76-2.82 (m, 1H), 2.91-2.94 (m, 1H), 3.41-3.43 (m, 1H), 4.33 (s, 1H), 7.22-7.25 (m, 1H), 7.42 (s, 6H), 7.74 (d,  $J = 7.2$  Hz, 2H), 11.88 (br s, 1H);  $^{13}\text{C NMR}$  (DMSO- $d_6$ , 100 MHz)  $\delta$ : 9.6, 21.6, 27.7, 35.0, 52.6, 77.5, 79.2, 119.3, 126.2, 129.6, 129.7, 130.1, 132.1, 134.7, 137.4, 162.6, 169.7, 194.4, 205.7; HRMS (ESI-TOF)  $m/z$ : Calcd. for  $\text{C}_{23}\text{H}_{20}\text{ClN}_3\text{NaO}_2\text{S}_2$   $[\text{M}+\text{Na}]^+$ : 492.0578; Found: 492.0582.

## 6. Preparative scale synthesis of the product 3a

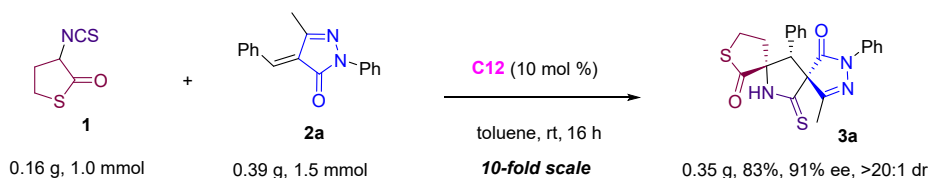

In a sealed tube equipped with a magnetic stirring bar, to the mixture of 3-isothiocyanatothiobutyl lactone **1** (0.16 g, 1.0 mmol), and squaramide catalyst **C12** (10 mol %) in 15 mL of

freshly distilled toluene was added alkylidene pyrazolone **2** (0.39 g, 1.5 mmol). The reaction mixture was stirred at room temperature for 16 h and was directly loaded onto a silica gel and purified by flash chromatography (hexane/EtOAc, 10/1, v/v) to give the desired product **3a** (0.35 g, 83%, 91% ee, >20:1 dr).

## 7. Further investigation of transformation of **3q**

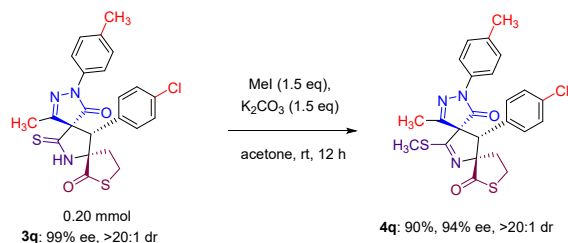

To a stirred solution of **3q** (93.8 mg, 0.20 mmol) in acetone (1.0 mL) was added K<sub>2</sub>CO<sub>3</sub> (41 mg, 0.30 mmol) at 0 °C. Then iodomethane (43 mg, 0.30 mmol) in 2.0 mL acetone was added dropwise into the stirred reaction mixture. The reaction mixture was allowed to stir at room temperature for another 12 h, and was directly loaded onto a silica gel and purified by flash chromatography (hexane/EtOAc, 10/1, v/v) to give the desired product **4q** (90%, 94% ee, >20:1 dr).

**4q**: Light yellow solid, m.p. 174.3-175.5 °C; yield 90%, 43.7 mg, 94% ee, >20:1 dr; The ee was determined by HPLC analysis using a Chiralpak IC column (90/10 hexane/*i*-PrOH; flow rate: 1.0 mL/min;  $\lambda$  = 254 nm;  $\tau_{major}$  = 7.69 min;  $\tau_{minor}$  = 10.47 min); <sup>1</sup>H NMR (CDCl<sub>3</sub>, 400 MHz)  $\delta$ : 2.24 (s, 3H), 2.28 (s, 3H), 2.48 (s, 3H), 2.84-2.88 (m, 1H), 3.25-3.28 (m, 1H), 3.37-3.38 (m, 1H), 3.53-3.60 (m, 1H), 4.45 (s, 1H), 7.21-7.23 (m, 2H), 7.32-7.39 (m, 4H), 7.55-7.57 (m, 2H); <sup>13</sup>C NMR (CDCl<sub>3</sub>, 100 MHz)  $\delta$ : 13.8, 14.2, 20.9, 28.7, 37.5, 54.1, 77.1, 89.3, 119.3, 129.5, 130.0, 131.1, 132.3, 134.1, 134.8, 135.8, 157.9, 168.3, 168.5, 206.5; HRMS (ESI-TOF) *m/z*: Calcd. for C<sub>24</sub>H<sub>22</sub>ClN<sub>3</sub>NaO<sub>2</sub>S<sub>2</sub> [M+Na]<sup>+</sup>: 506.0734; Found: 506.0737.

## 8. X-ray crystal data for compound 3k

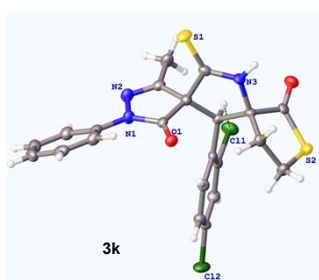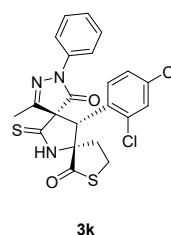

**Table S1 Crystal data and structure refinement for 3k**

|                                             |                                                                                              |
|---------------------------------------------|----------------------------------------------------------------------------------------------|
| Identification code                         | <b>3k</b>                                                                                    |
| Empirical formula                           | C <sub>22</sub> H <sub>17</sub> Cl <sub>2</sub> N <sub>3</sub> O <sub>2</sub> S <sub>2</sub> |
| Formula weight                              | 490.40                                                                                       |
| Temperature/K                               | 169.99(10)                                                                                   |
| Crystal system                              | monoclinic                                                                                   |
| Space group                                 | P2 <sub>1</sub>                                                                              |
| a/Å, b/Å, c/Å                               | 9.0271(6), 10.9083(6), 11.1404(8)                                                            |
| α/°, β/°, γ/°                               | 90, 105.790(7), 90.                                                                          |
| Volume/Å <sup>3</sup>                       | 1055.60(12)                                                                                  |
| Z                                           | 2                                                                                            |
| ρ <sub>calc</sub> /cm <sup>3</sup>          | 1.543                                                                                        |
| μ/mm <sup>-1</sup>                          | 0.532                                                                                        |
| F(000)                                      | 504.0                                                                                        |
| Radiation                                   | Mo Kα (λ = 0.71073)                                                                          |
| Crystal size/mm <sup>3</sup>                | 0.15 × 0.12 × 0.11                                                                           |
| 2θ range for data collection/°              | 4.69 to 58.856                                                                               |
| Index ranges                                | -10 ≤ h ≤ 11, -14 ≤ k ≤ 14, -11 ≤ l ≤ 15                                                     |
| Reflections collected                       | 5127                                                                                         |
| Independent reflections                     | 3901 [R <sub>int</sub> = 0.0231, R <sub>sigma</sub> = 0.0540]                                |
| Data/restraints/parameters                  | 3901/1/281                                                                                   |
| Goodness-of-fit on F <sup>2</sup>           | 0.978                                                                                        |
| Final R indexes [I ≥ 2σ (I)]                | R <sub>1</sub> = 0.0359, wR <sub>2</sub> = 0.0685                                            |
| Final R indexes [all data]                  | R <sub>1</sub> = 0.0416, wR <sub>2</sub> = 0.0709                                            |
| Largest diff. peak/hole / e Å <sup>-3</sup> | 0.26/-0.23                                                                                   |
| Flack/Hoof parameter                        | -0.01(4)/0.00(5)                                                                             |

**Crystal Data** for C<sub>22</sub>H<sub>17</sub>Cl<sub>2</sub>N<sub>3</sub>O<sub>2</sub>S<sub>2</sub> (*M* = 490.40 g/mol): monoclinic, space group P2<sub>1</sub> (no. 4), *a* = 9.0271(6) Å, *b* = 10.9083(6) Å, *c* = 11.1404(8) Å, β = 105.790(7)°, *V* = 1055.60(12) Å<sup>3</sup>, *Z* = 2, *T* = 169.99(10) K, μ(Mo Kα) = 0.532 mm<sup>-1</sup>, *D*<sub>calc</sub> = 1.543 g/cm<sup>3</sup>, 5127 reflections measured (4.69° ≤ 2θ ≤ 58.856°), 3901 unique (*R*<sub>int</sub> = 0.0231, *R*<sub>sigma</sub> = 0.0540) which were used in all calculations. The final *R*<sub>1</sub> was 0.0359 (*I* > 2σ(*I*)) and *wR*<sub>2</sub> was 0.0709 (all data).

## 9. The Copies of $^1\text{H}$ NMR, $^{13}\text{C}$ NMR and HPLC Spectra for Compounds 1, 3 and 4

### $^1\text{H}$ and $^{13}\text{C}$ NMR of 1

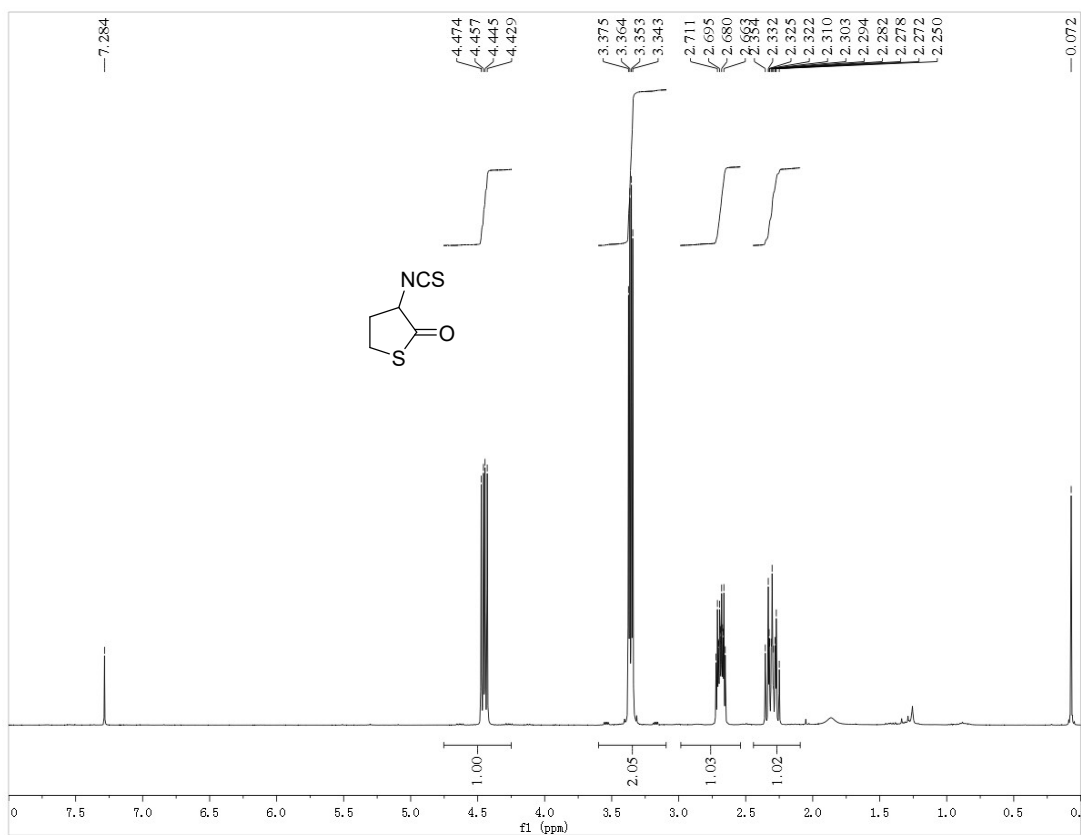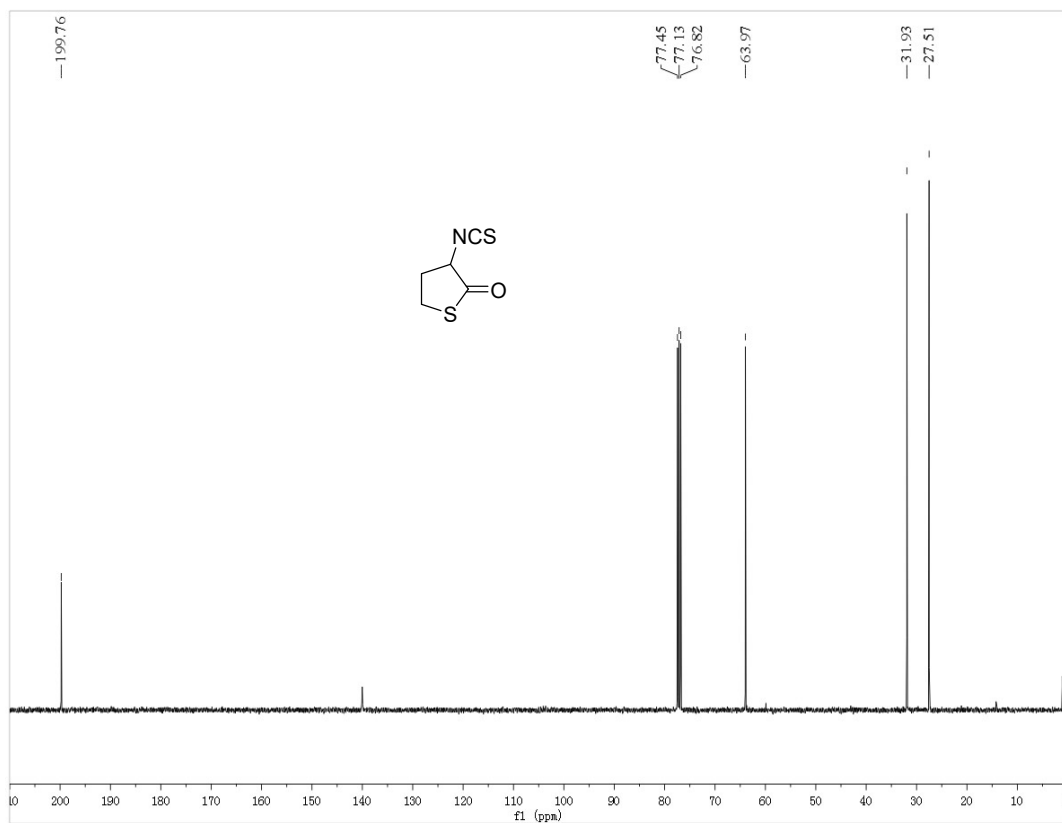



### $^1\text{H}$ and $^{13}\text{C}$ NMR of 3a

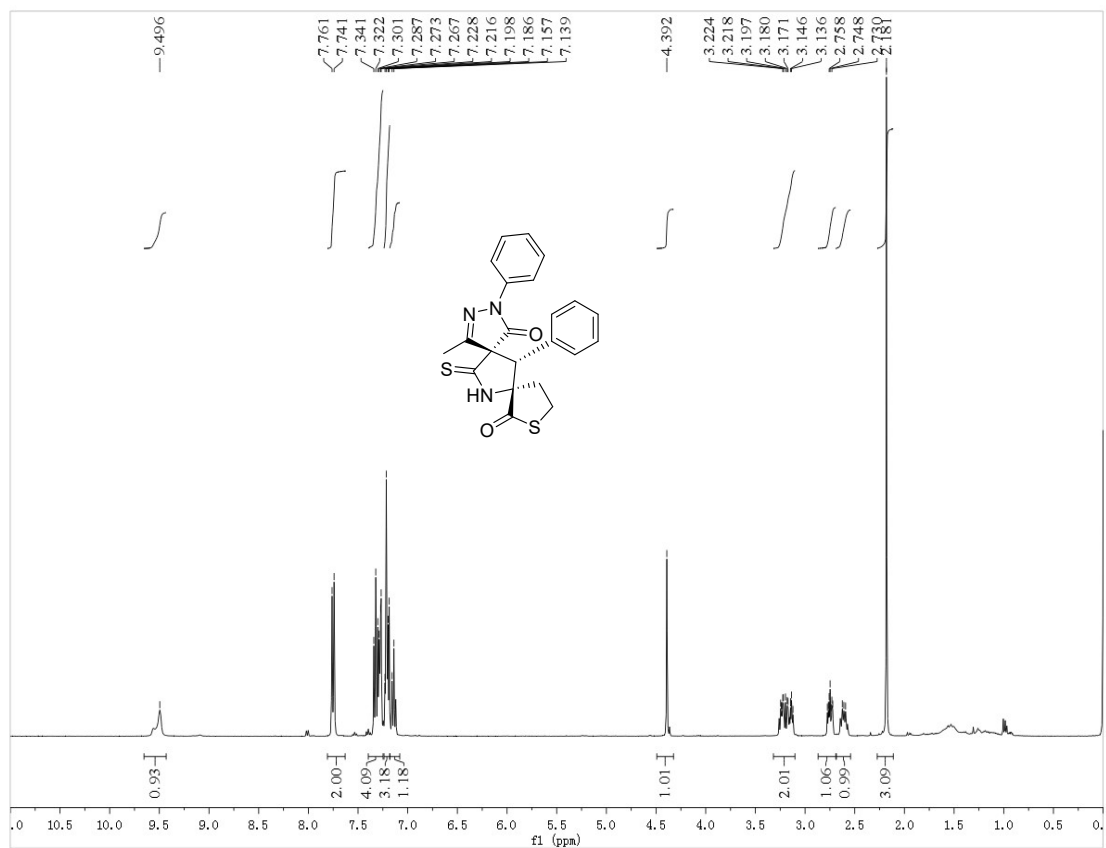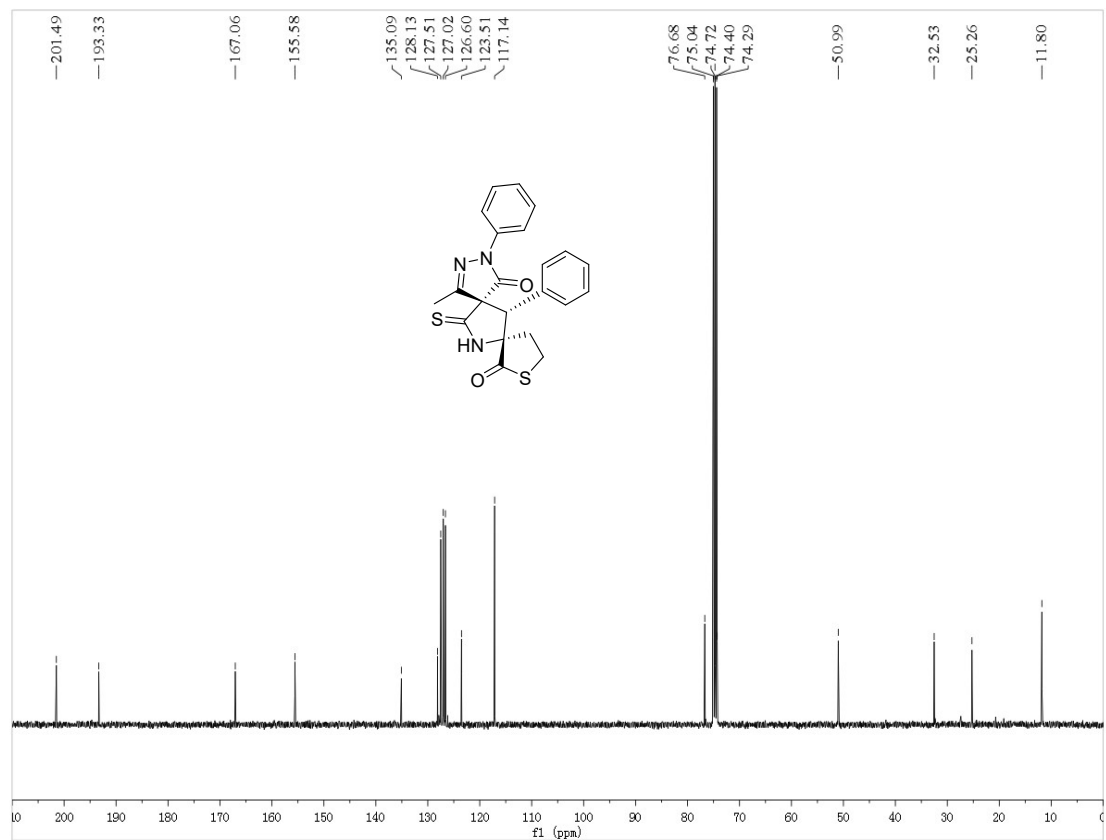

### HPLC of 3a

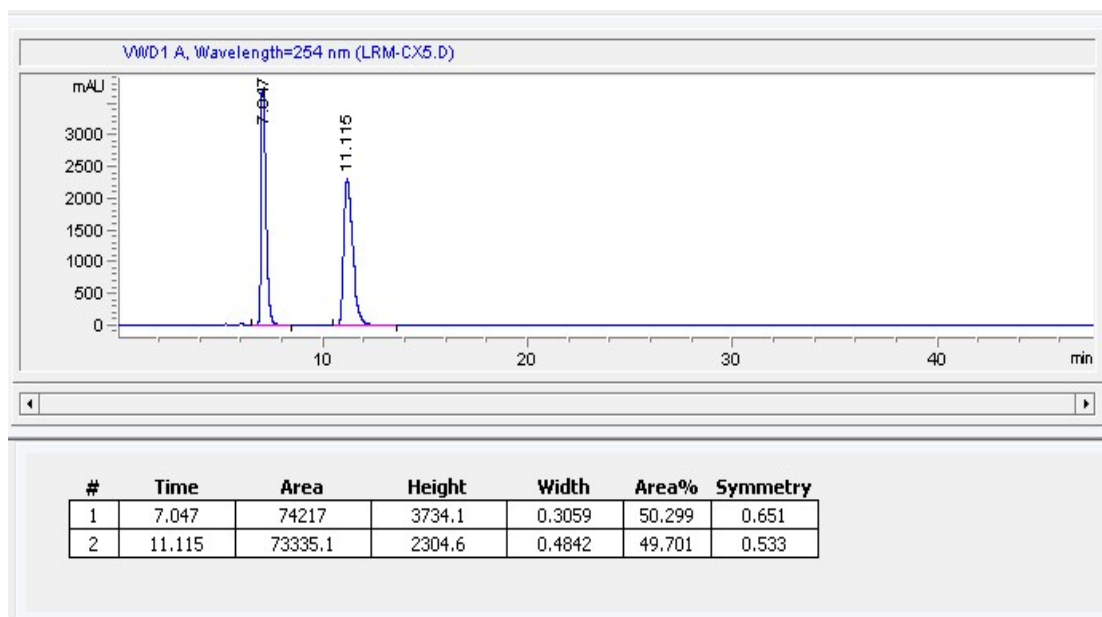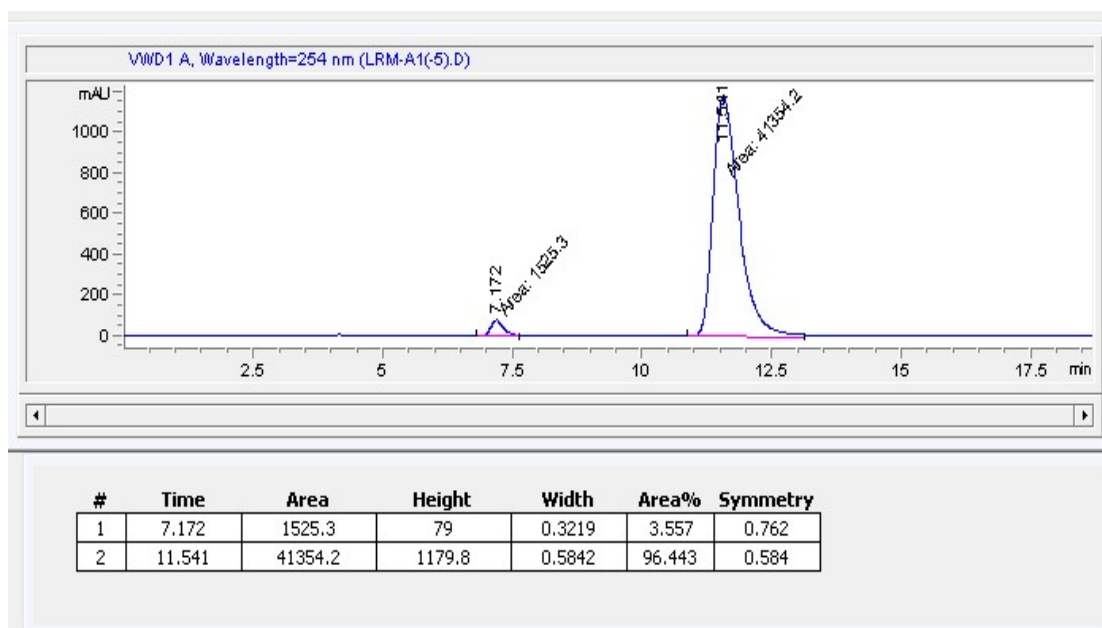

# <sup>1</sup>H and <sup>13</sup>C NMR of 3b

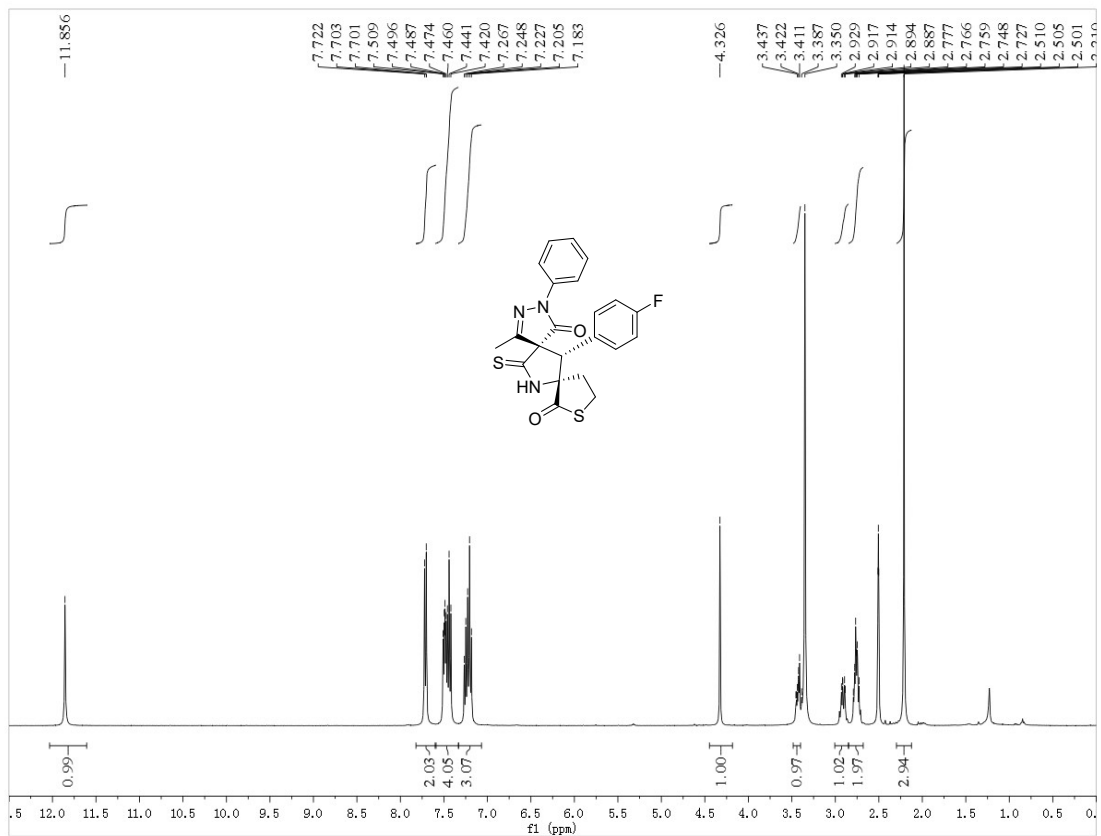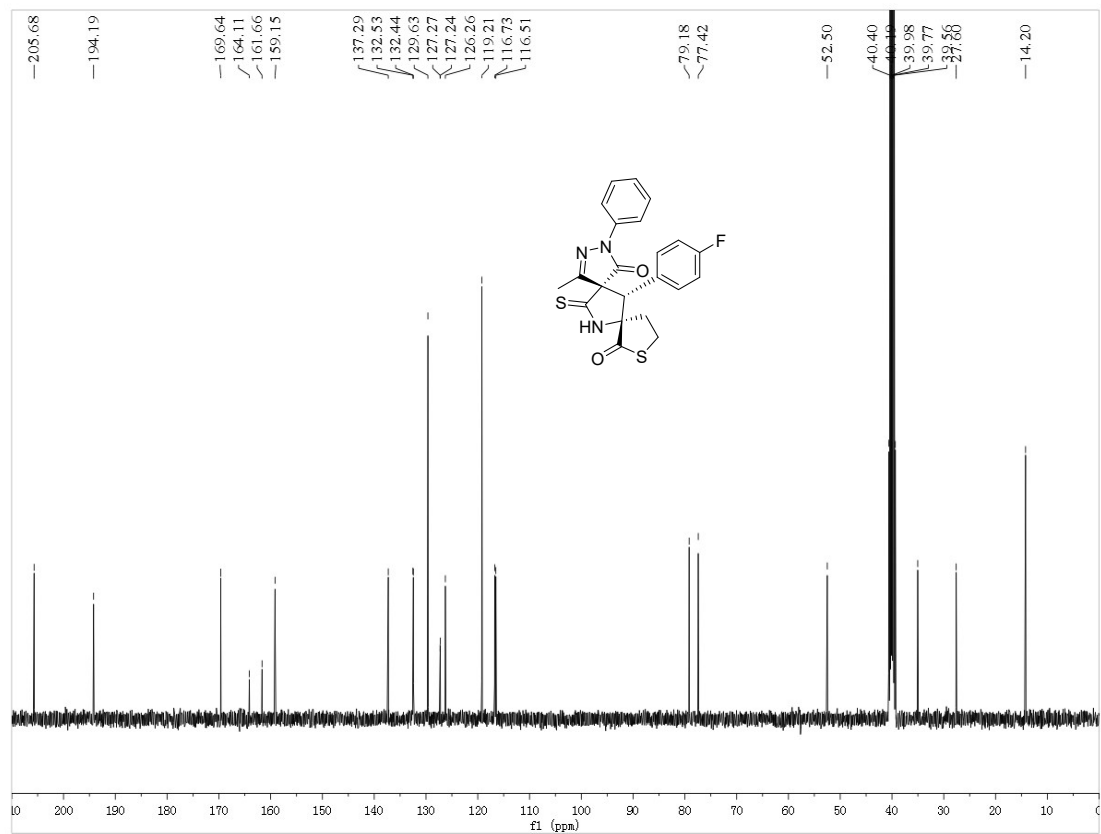

**<sup>19</sup>F NMR of 3b**

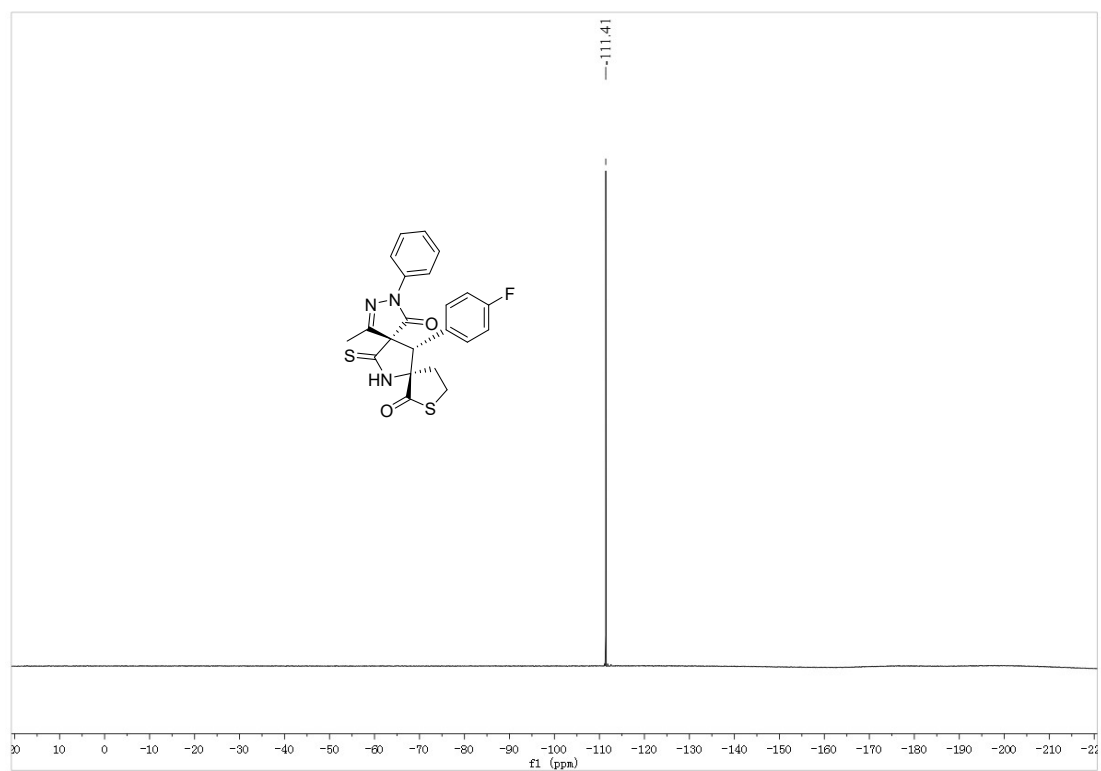

### HPLC of 3b

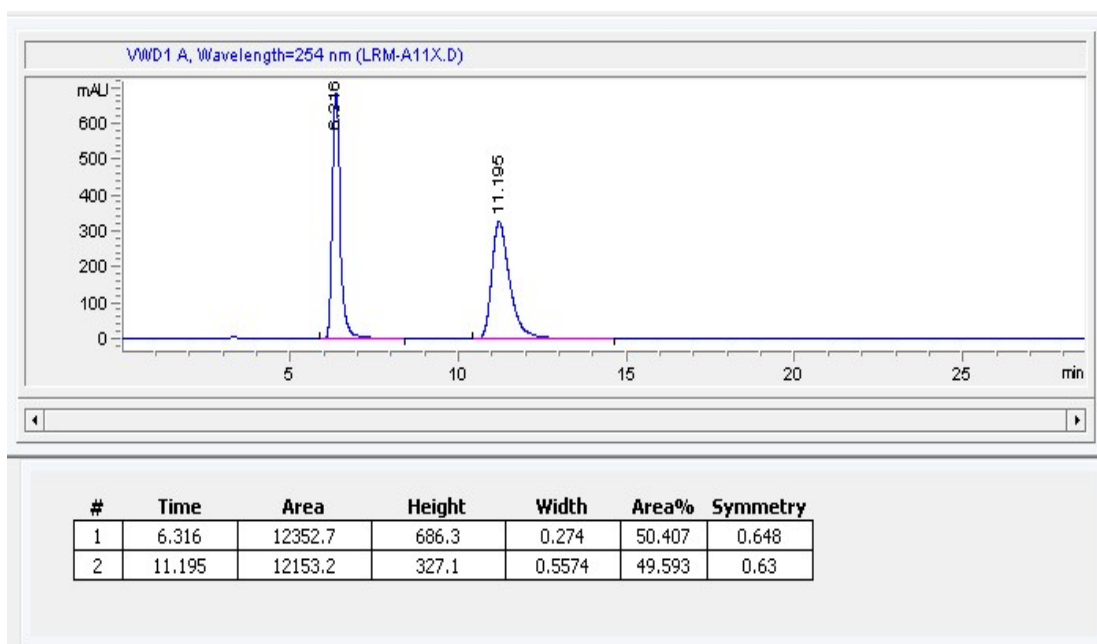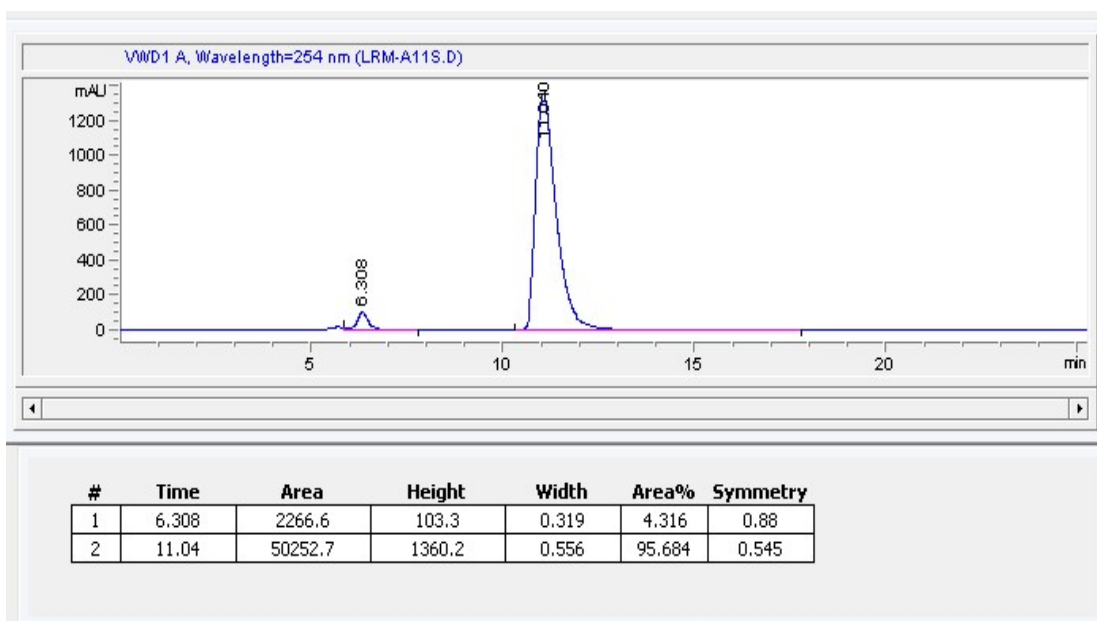

# <sup>1</sup>H and <sup>13</sup>C NMR of 3c

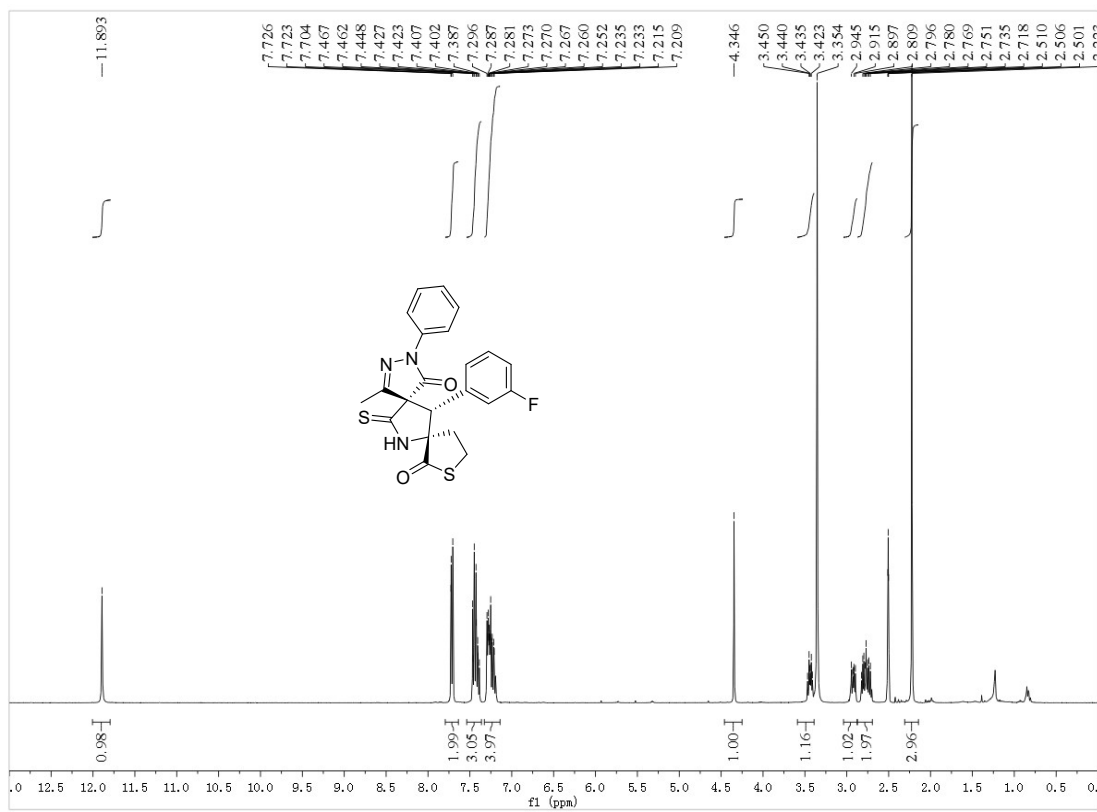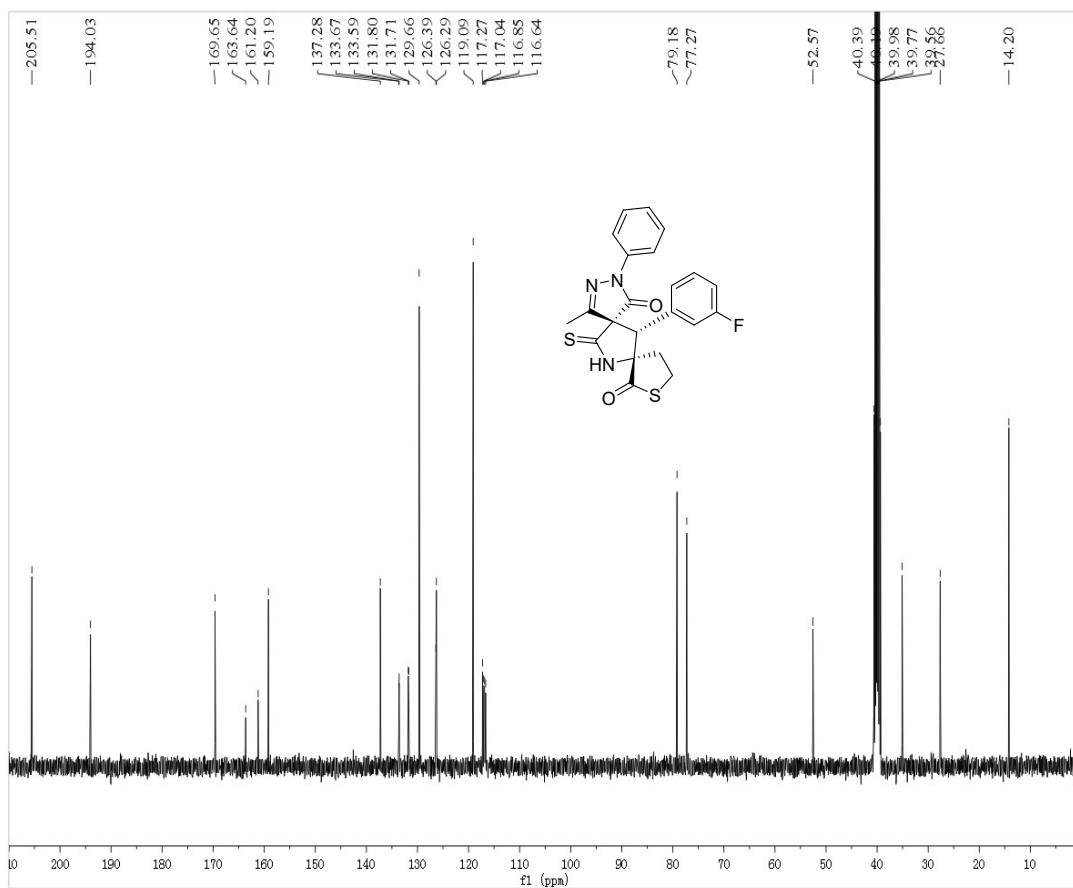

**<sup>19</sup>F NMR of 3c**

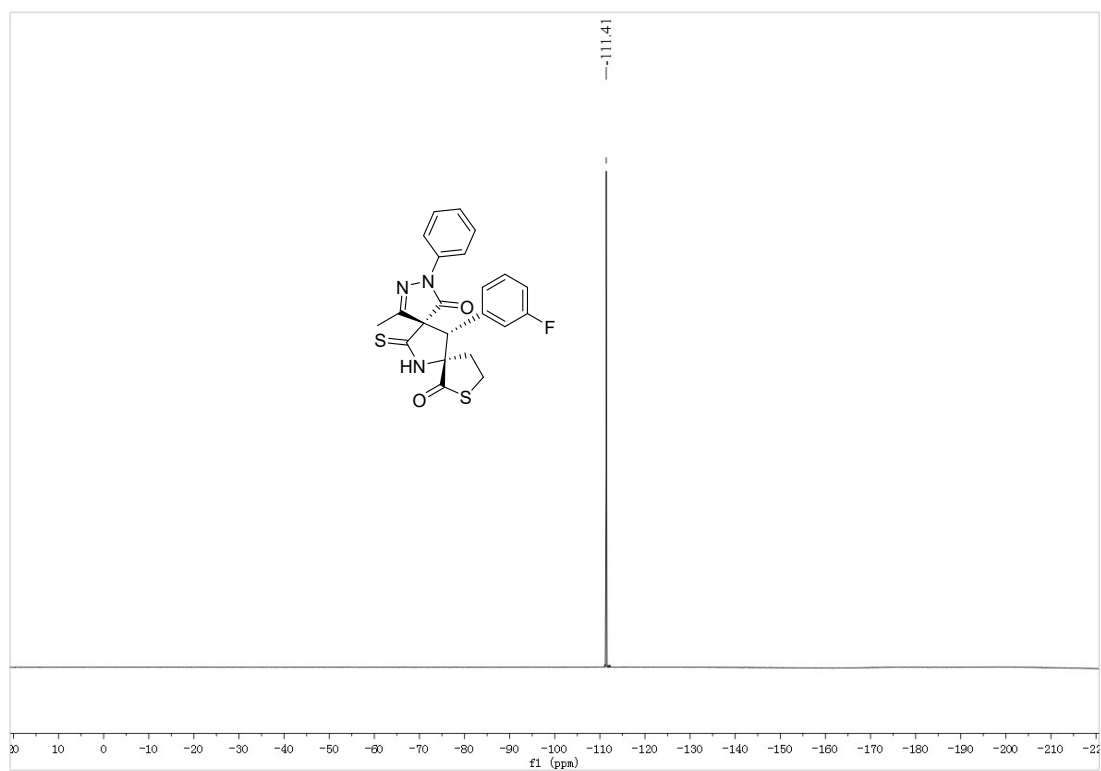

### HPLC of 3c

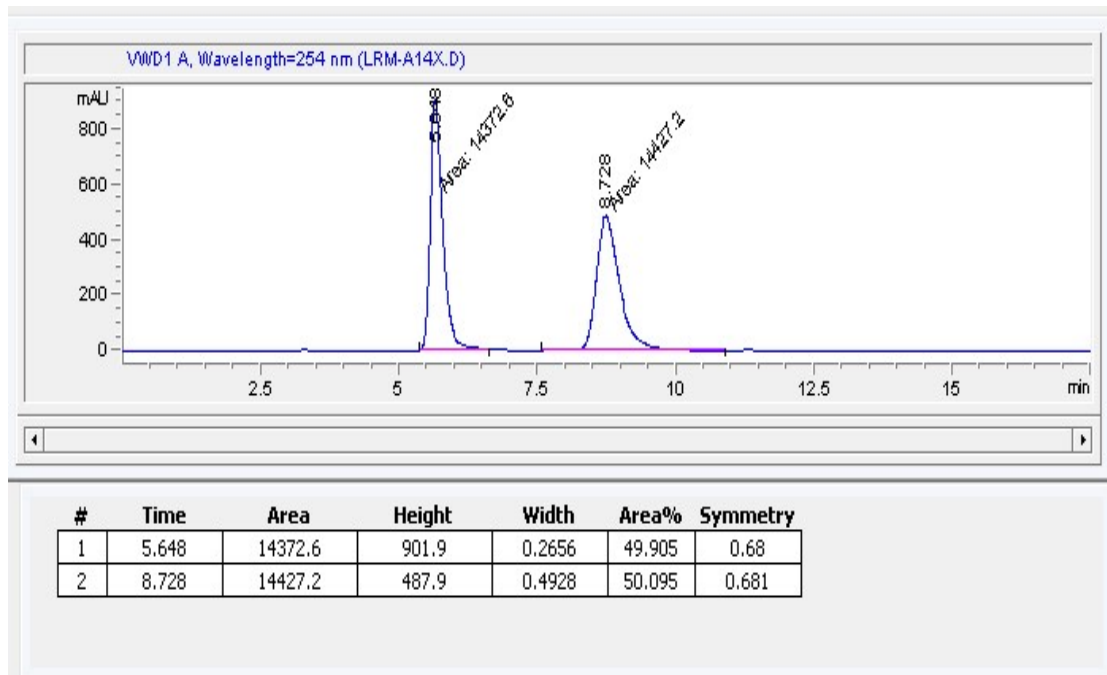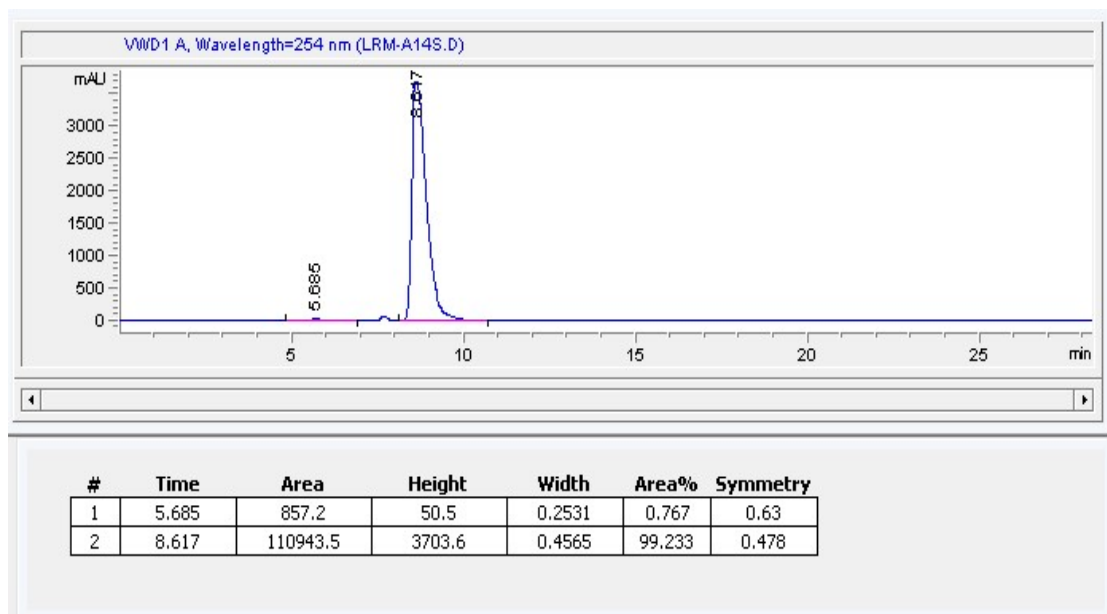



### <sup>1</sup>H and <sup>13</sup>C NMR of 3d

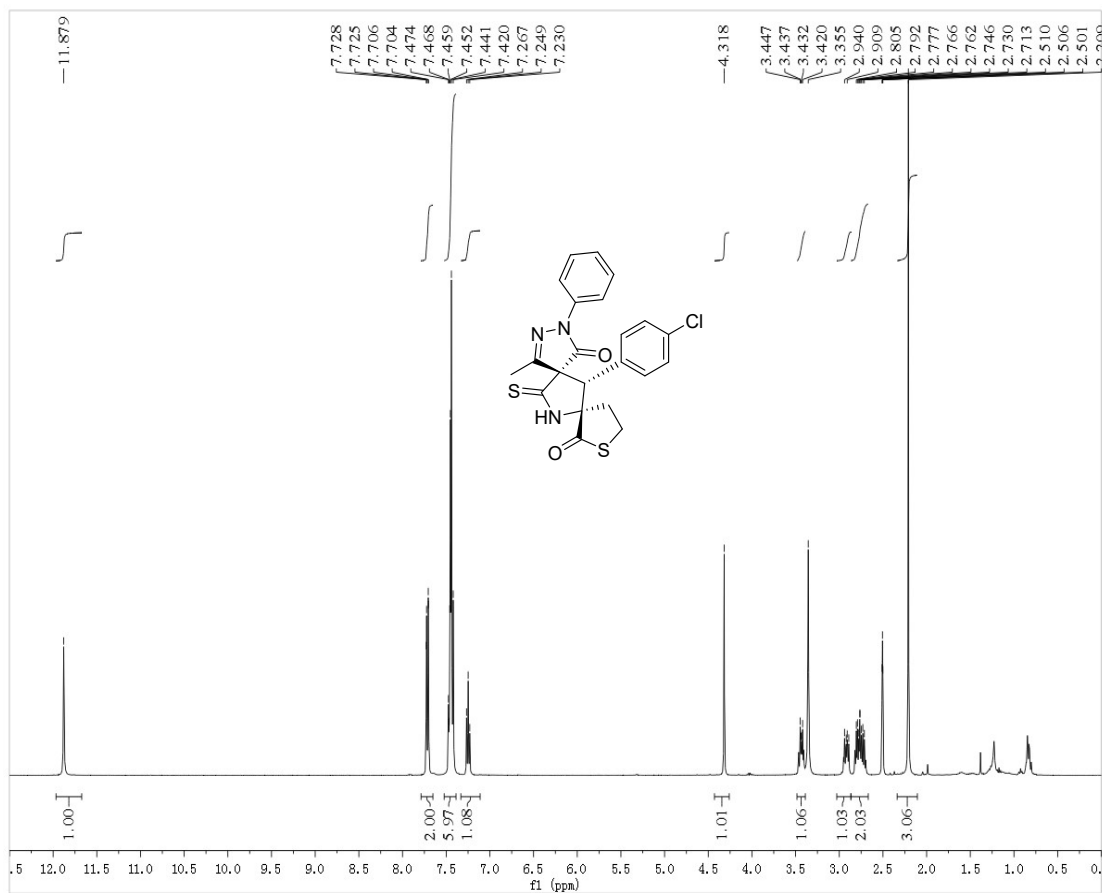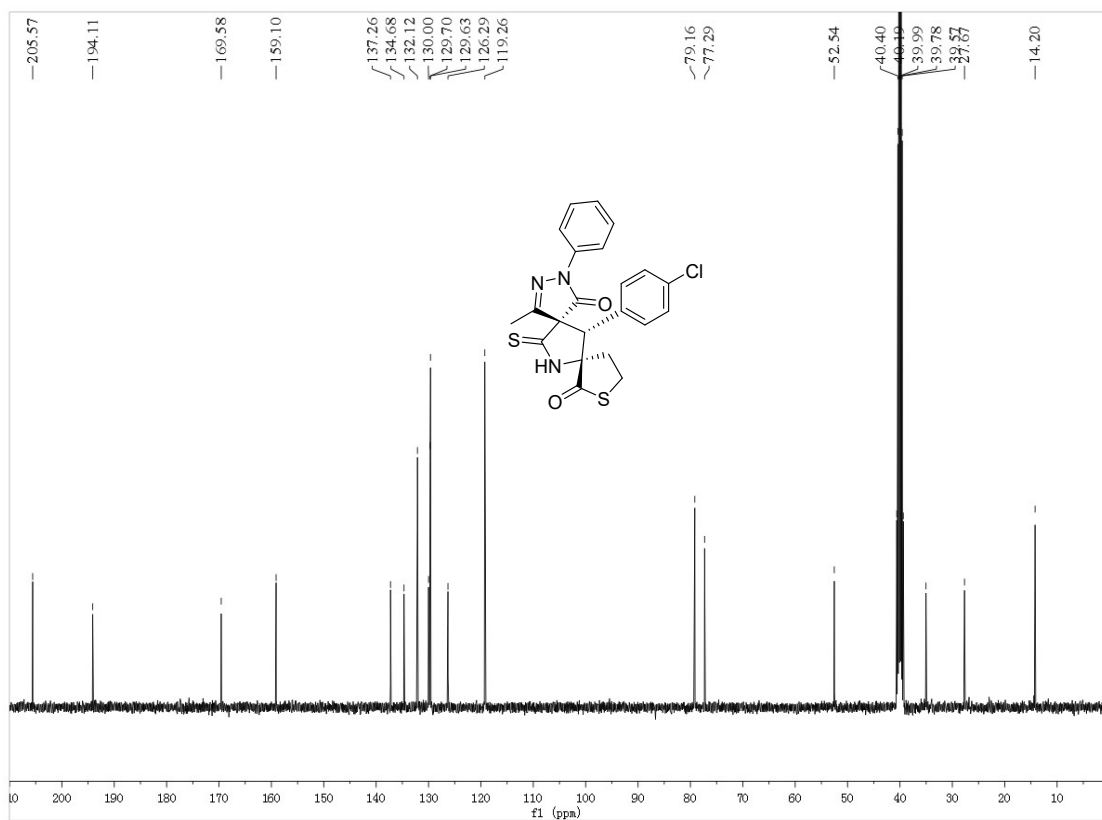

### HPLC of 3d

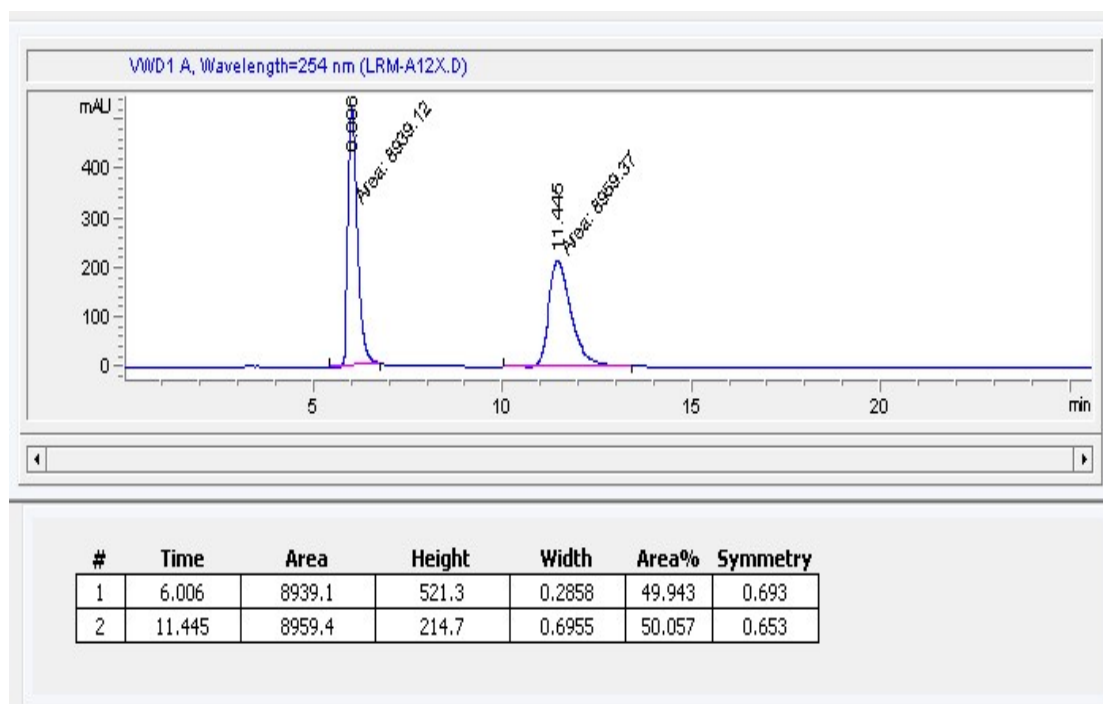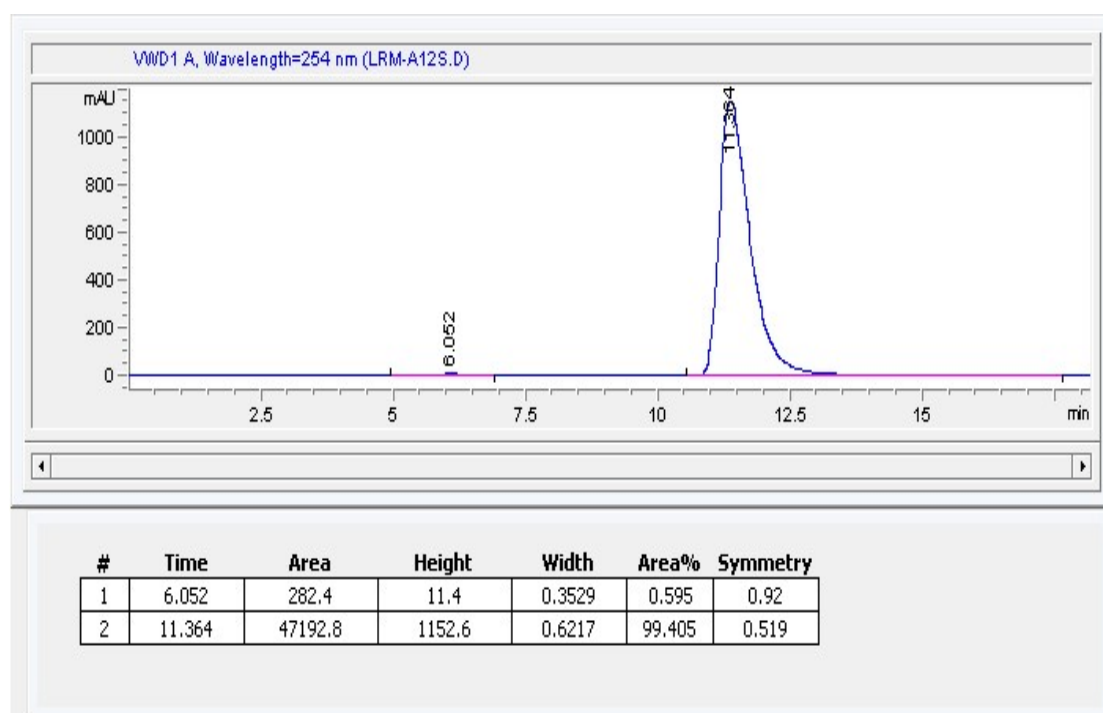

# <sup>1</sup>H and <sup>13</sup>C NMR of 3e

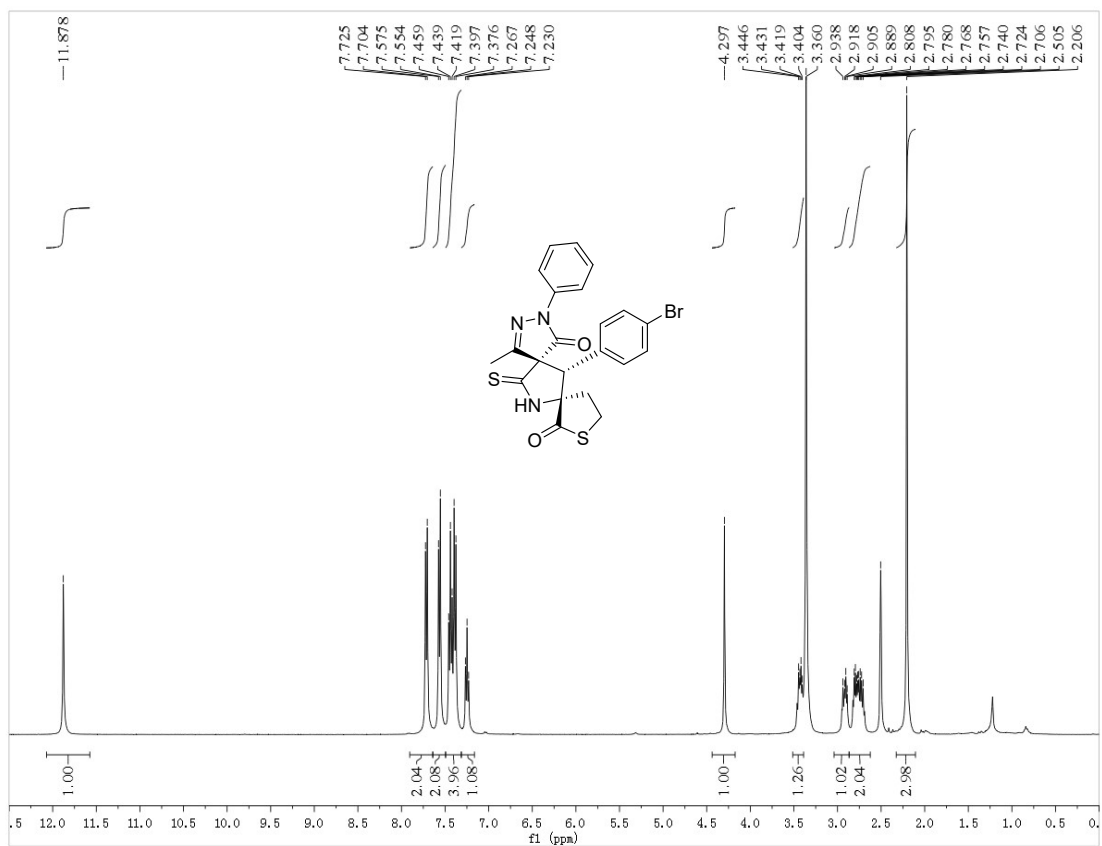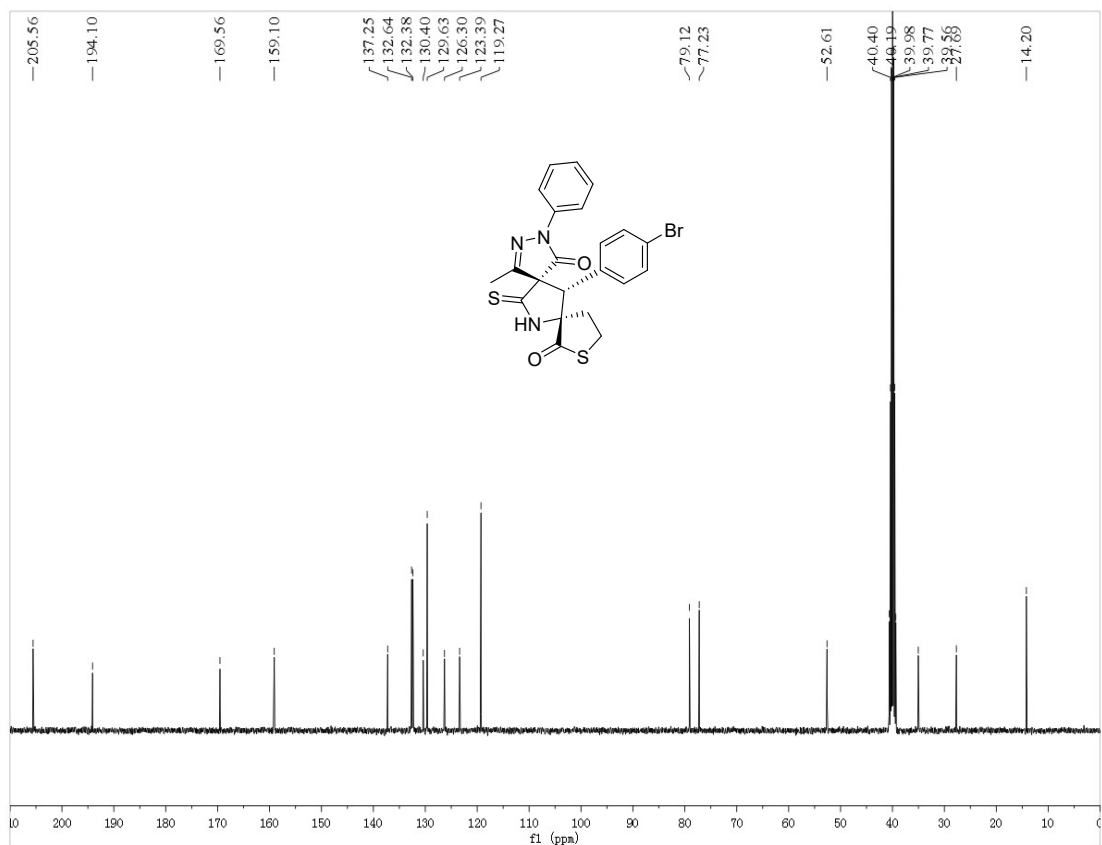

### HPLC of 3e

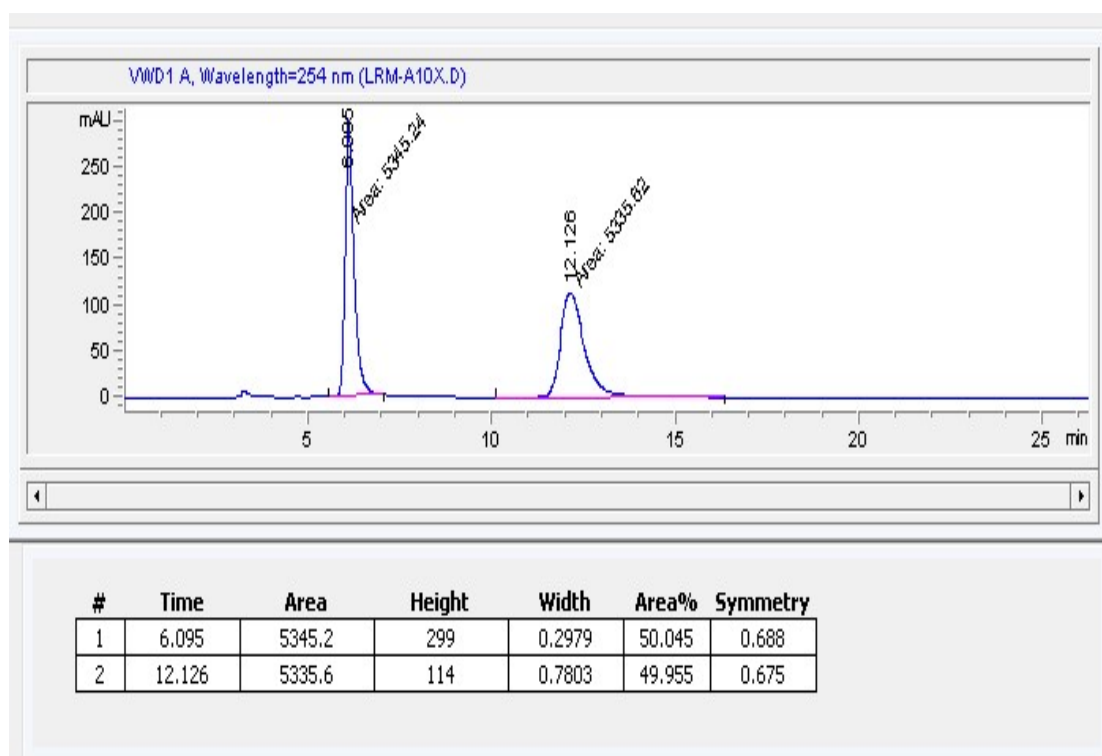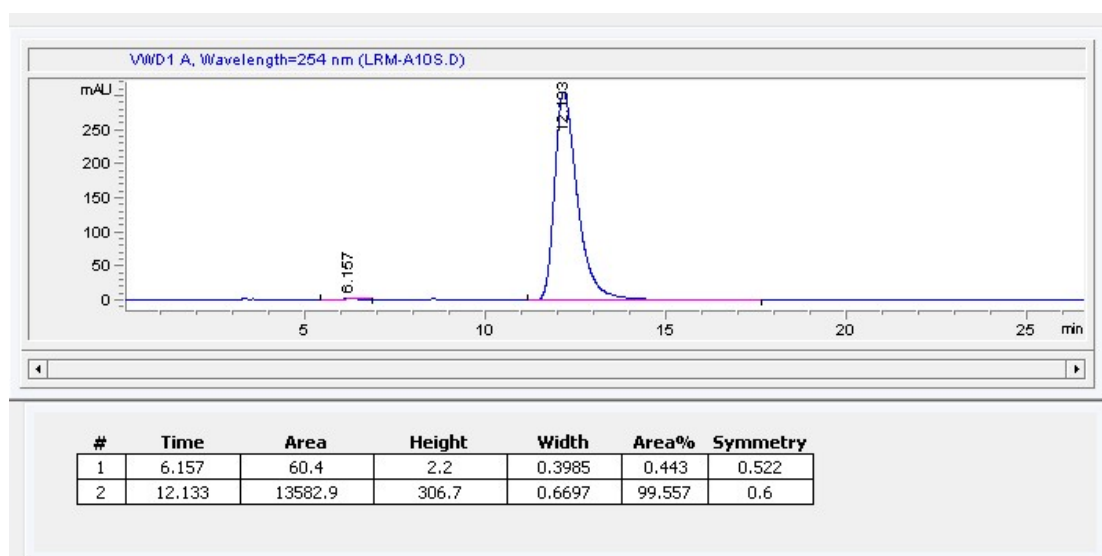

# <sup>1</sup>H and <sup>13</sup>C NMR of 3f

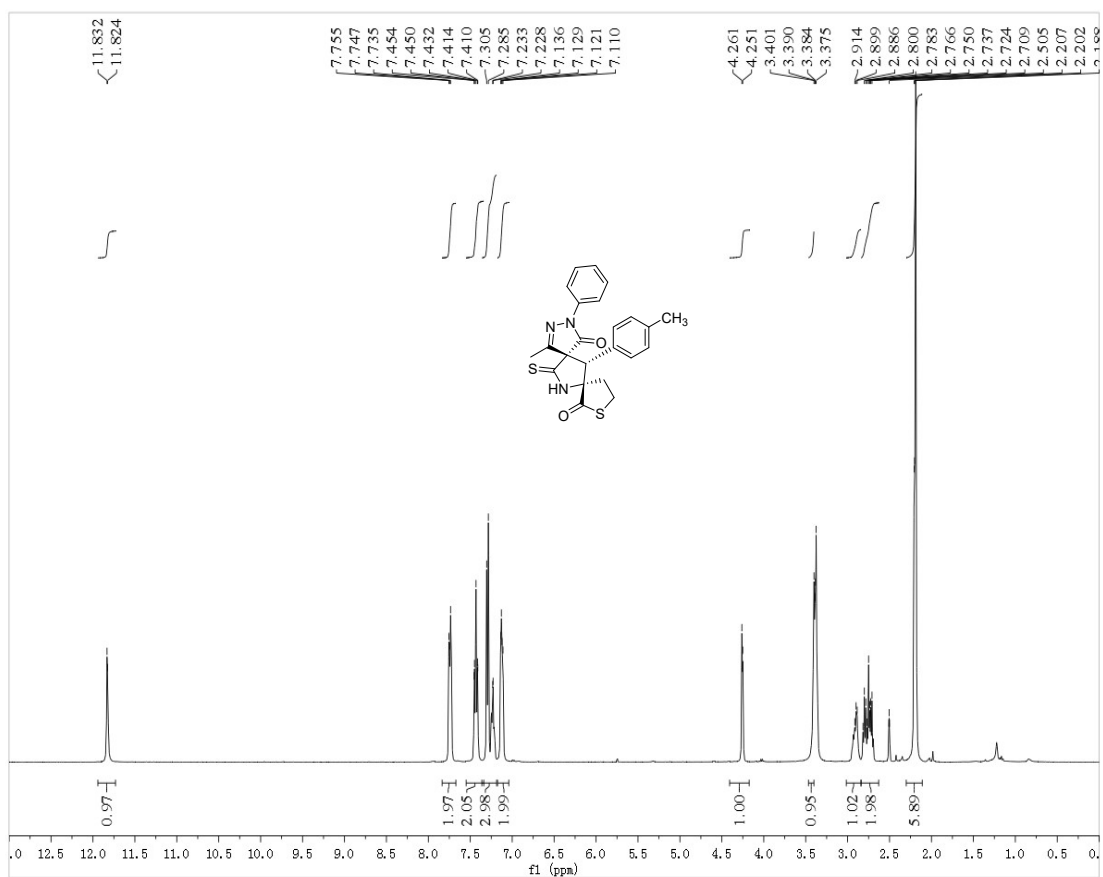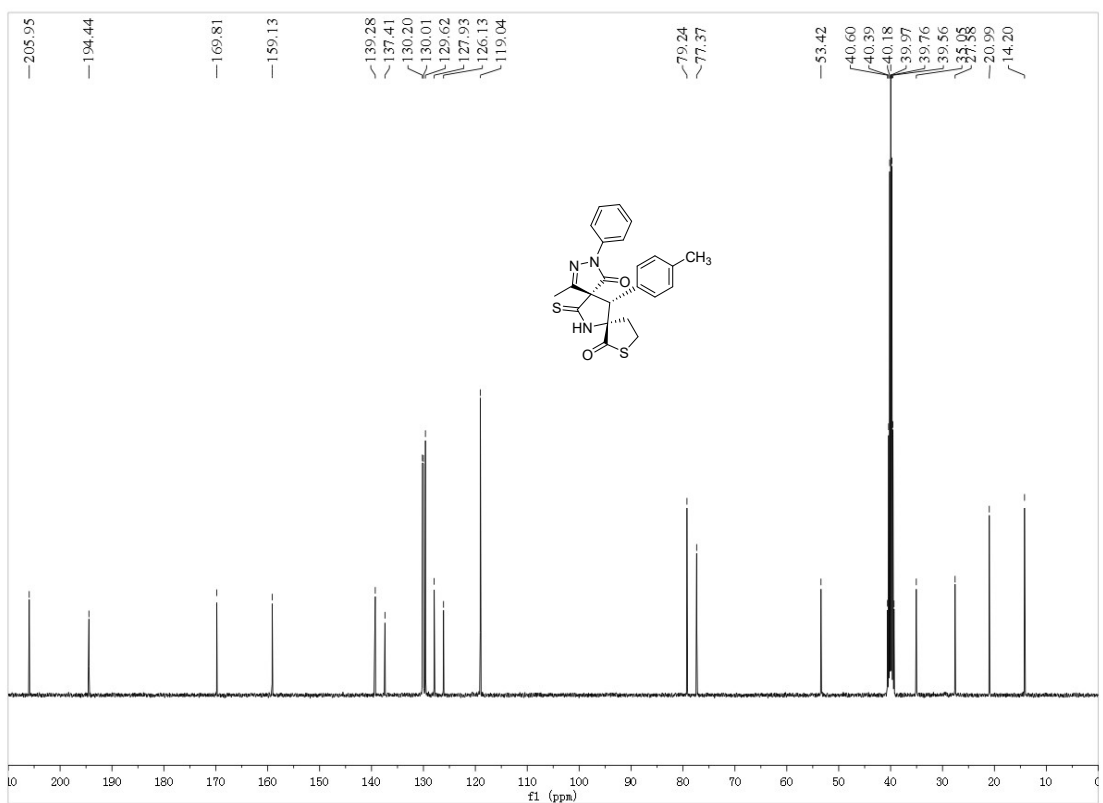

### HPLC of 3f

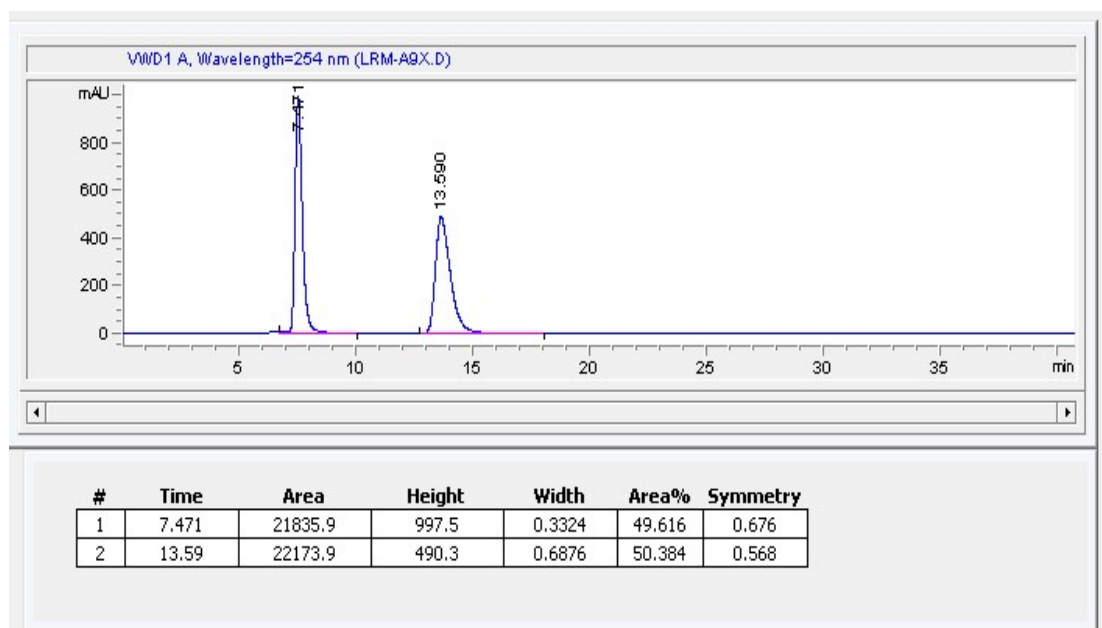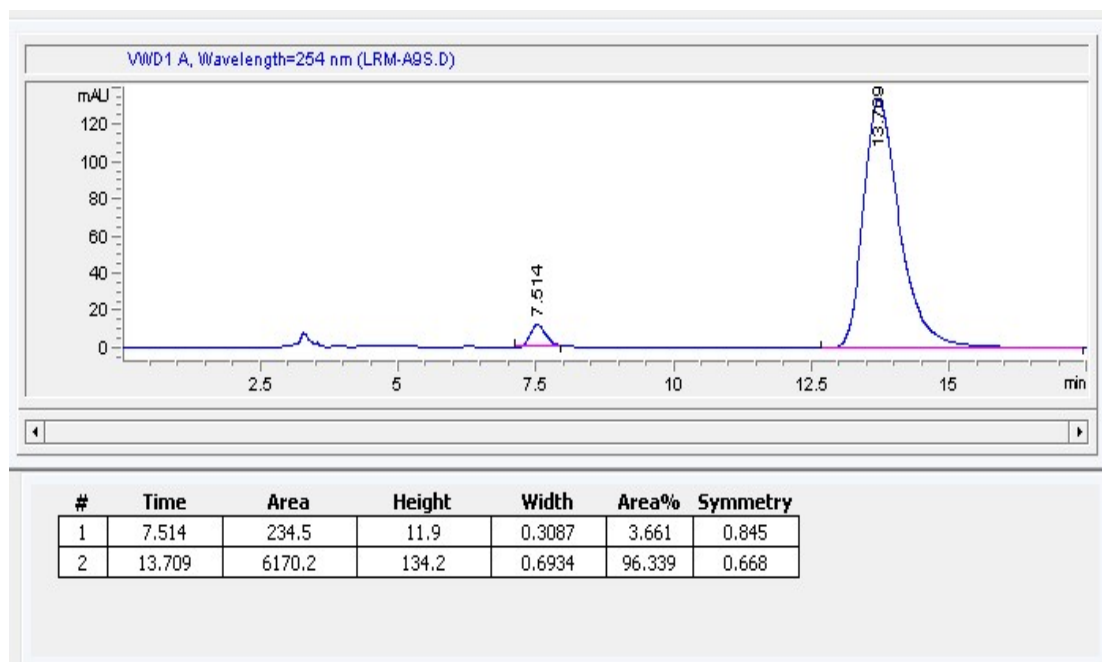

**<sup>1</sup>H and <sup>13</sup>C NMR of 3g**

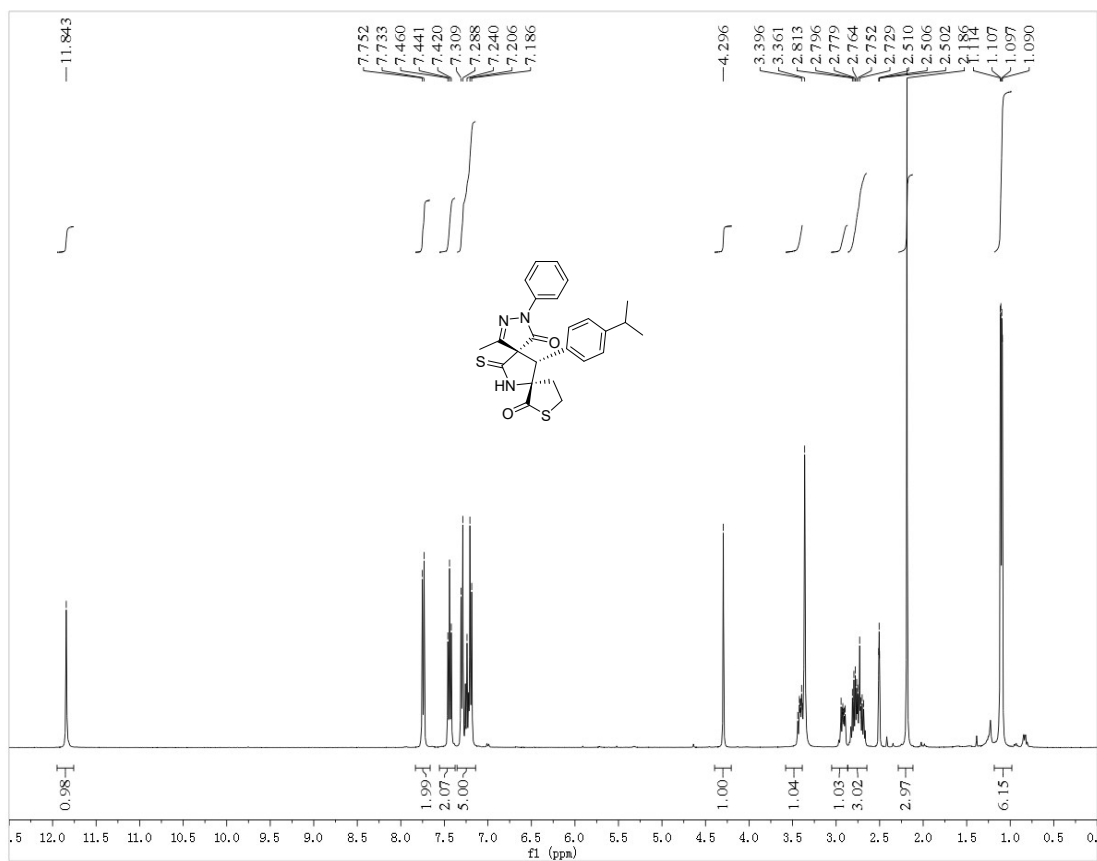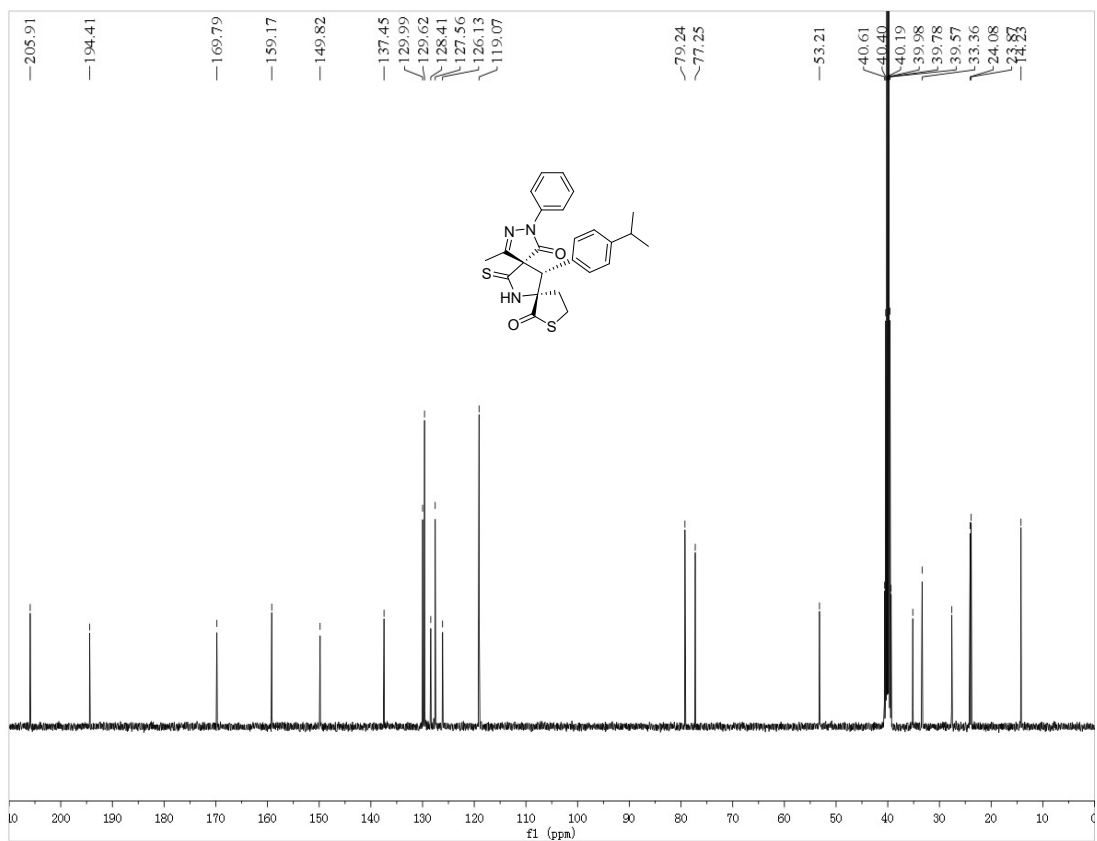

### HPLC of 3g

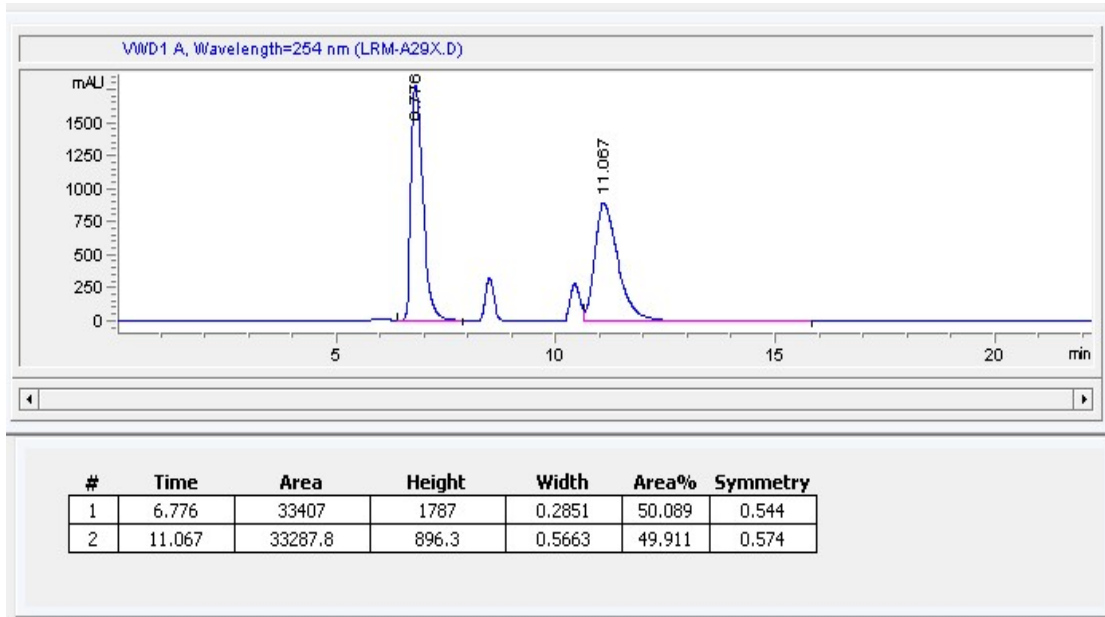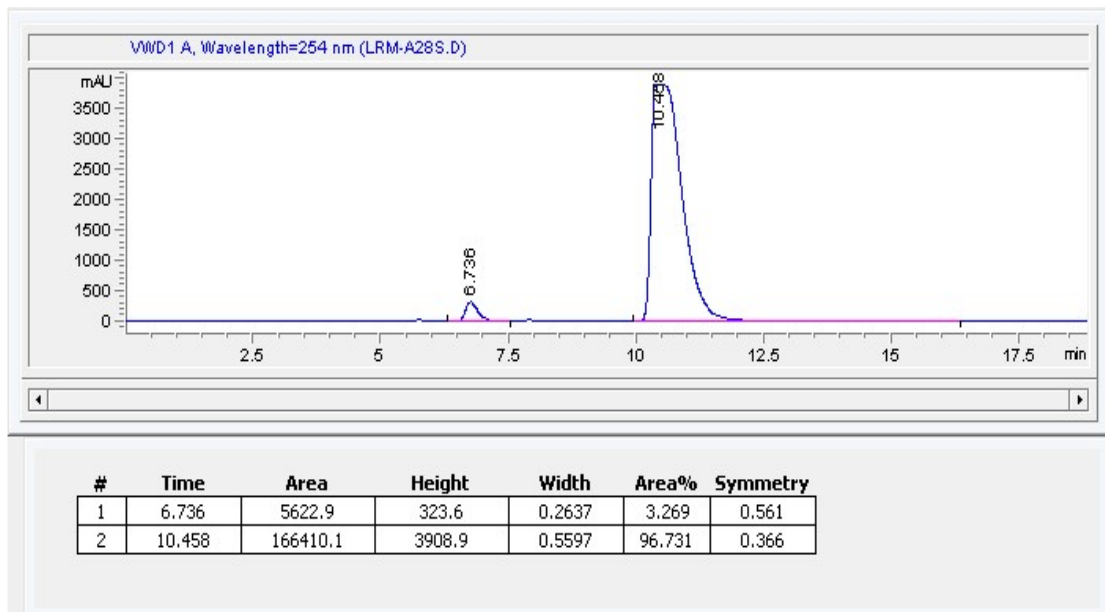



### <sup>1</sup>H and <sup>13</sup>C NMR of 3h

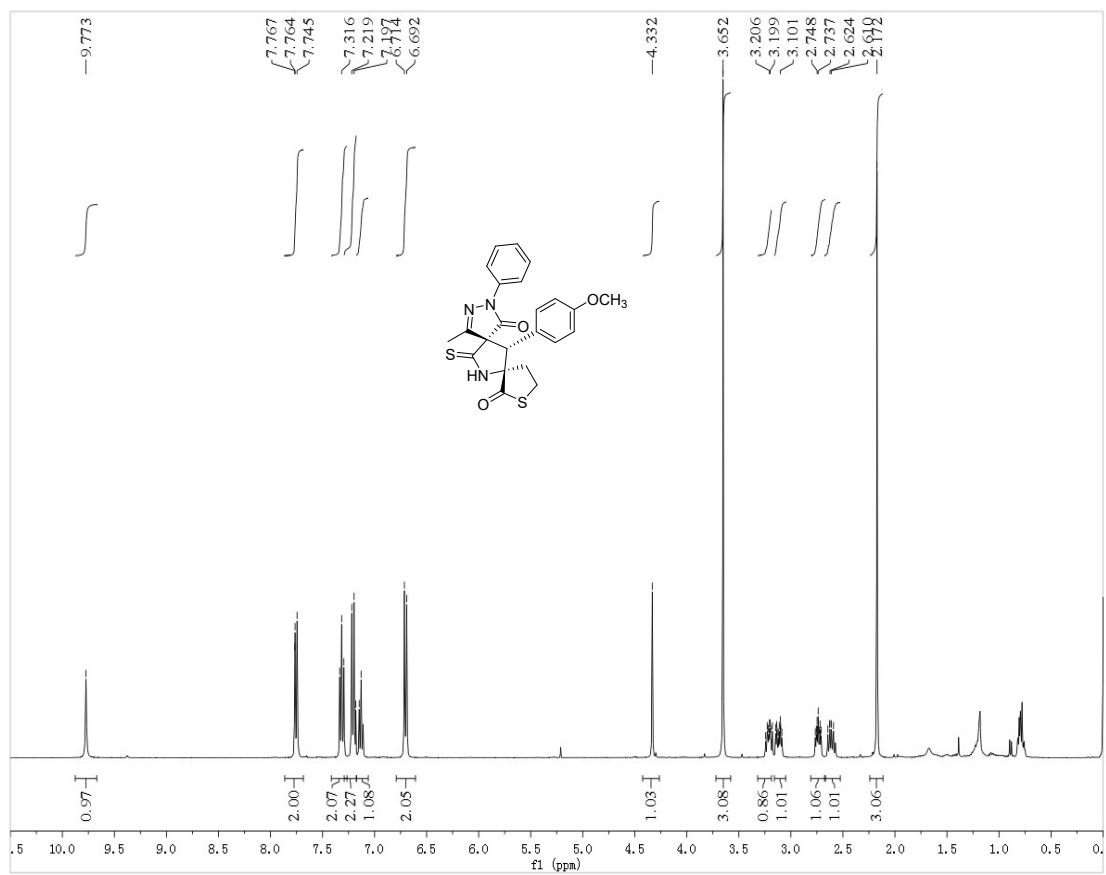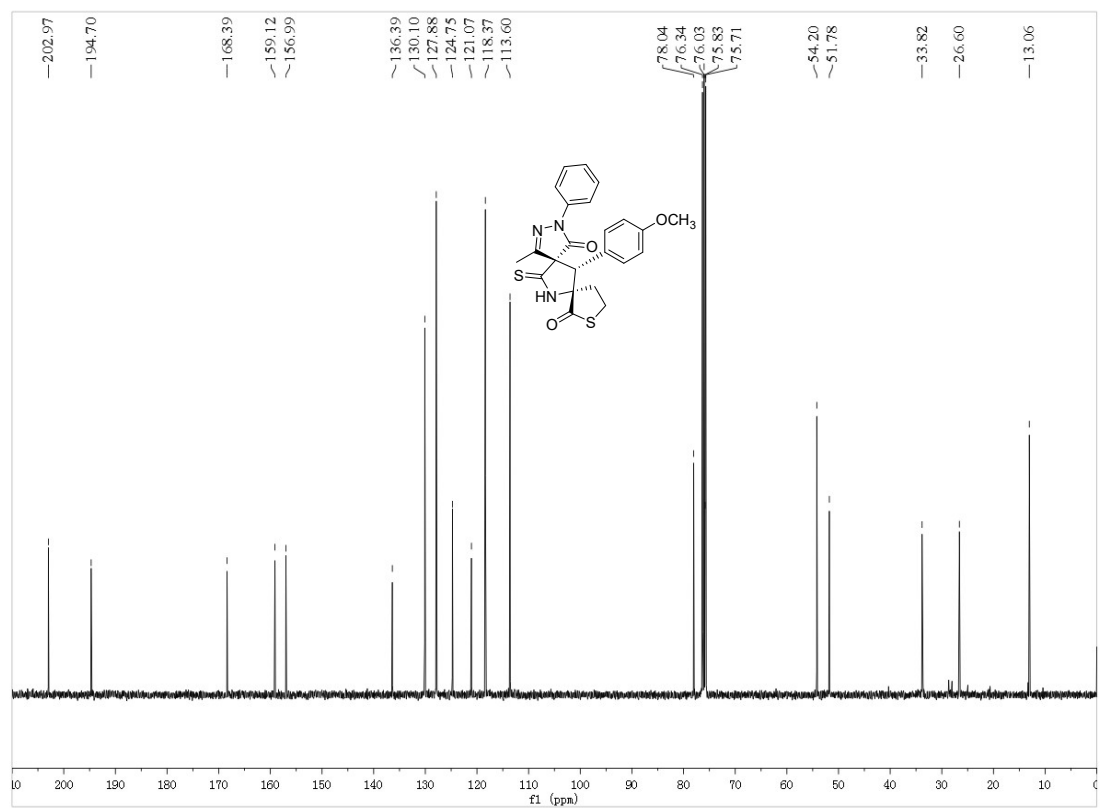

### HPLC of 3h

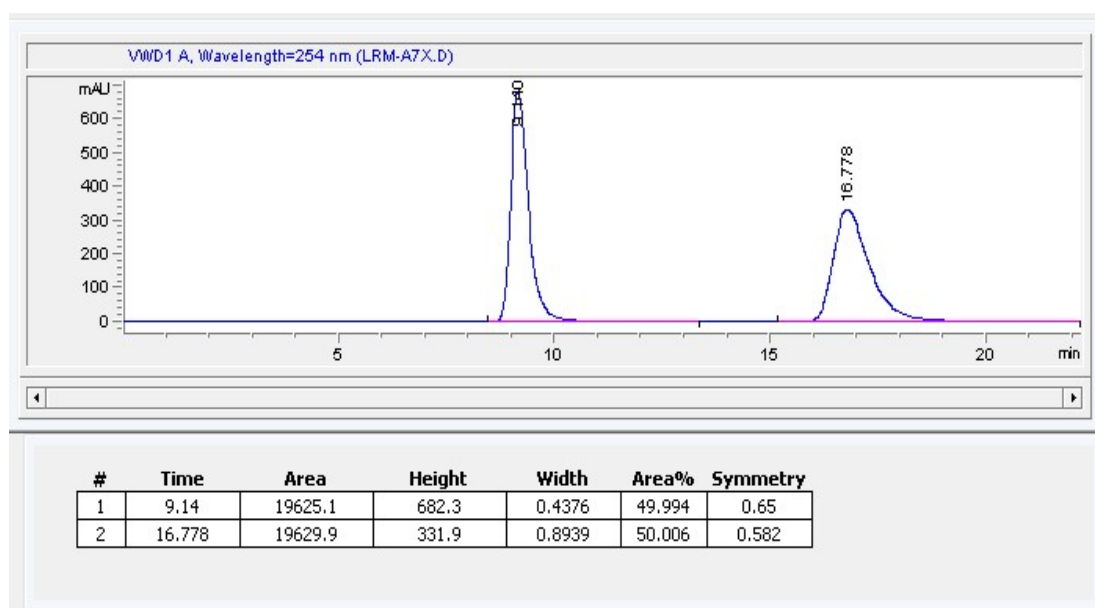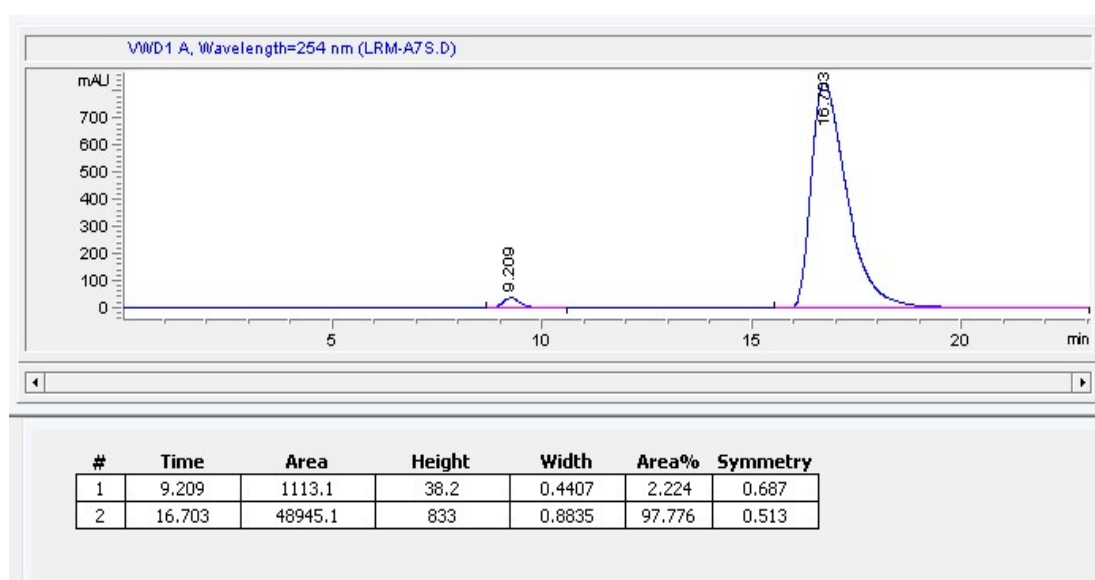

### $^1\text{H}$ and $^{13}\text{C}$ NMR of 3i

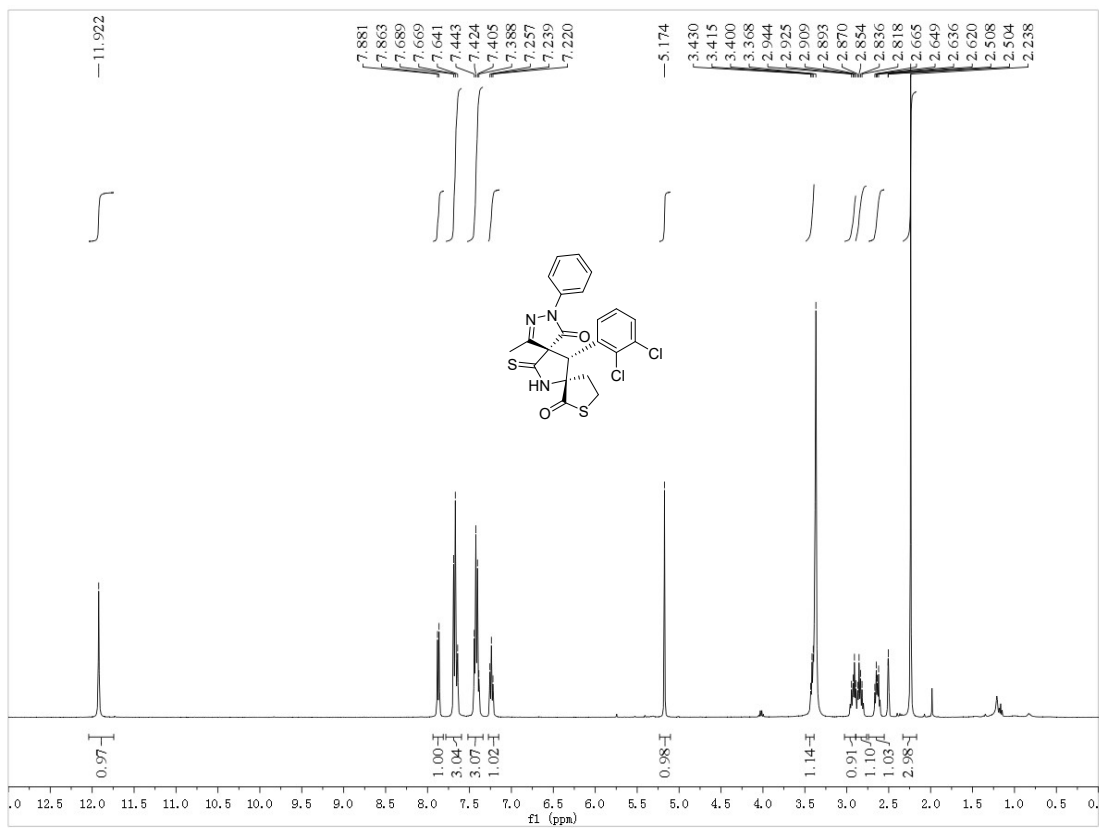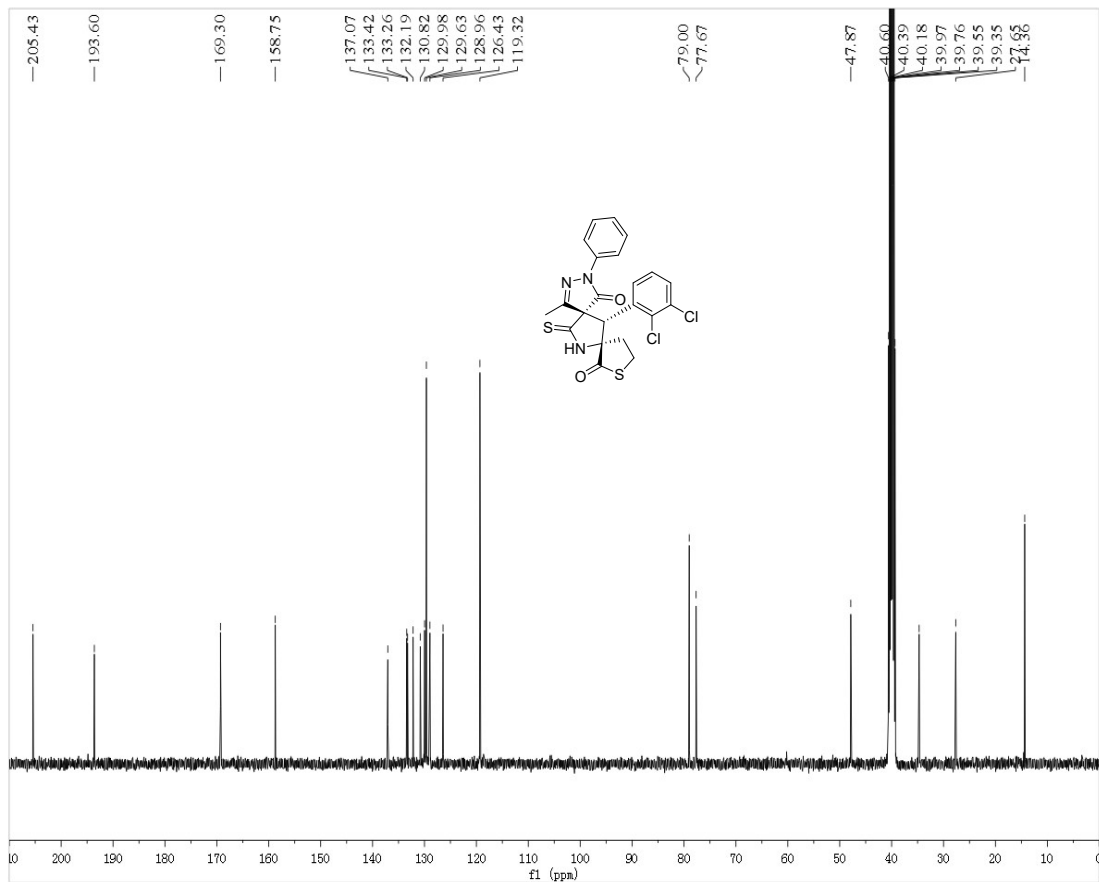

### HPLC of 3i

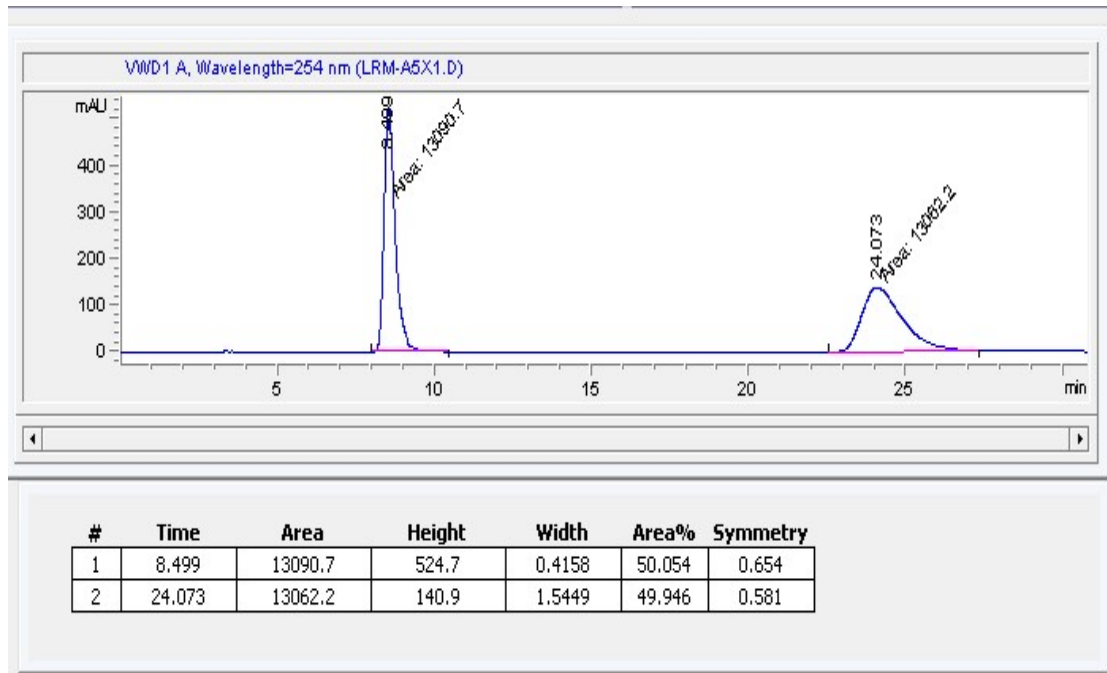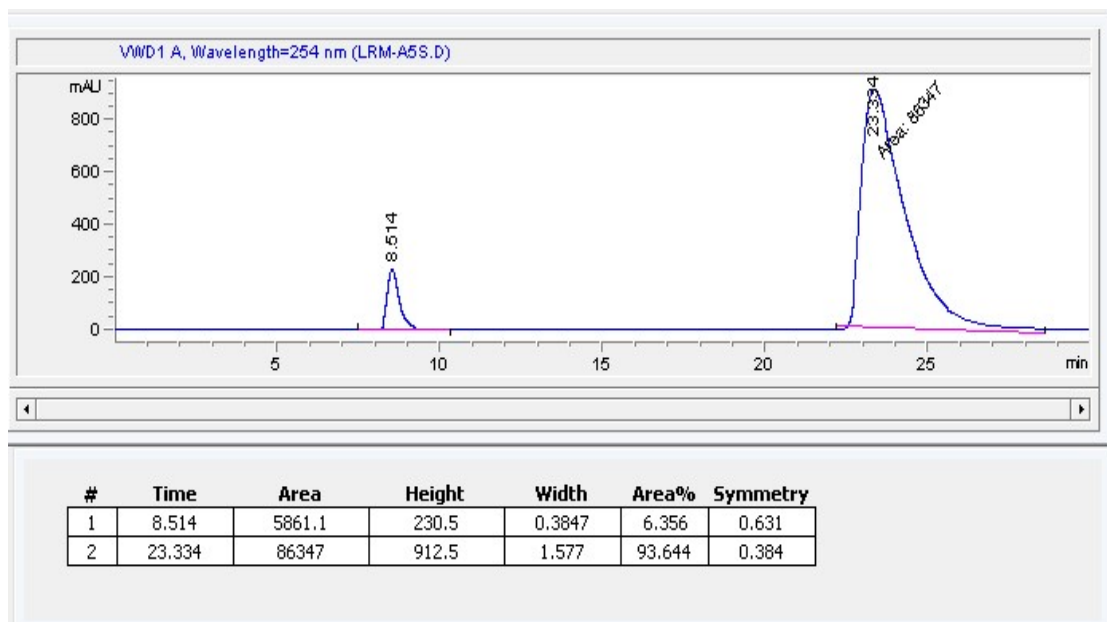

# <sup>1</sup>H and <sup>13</sup>C NMR of 3j

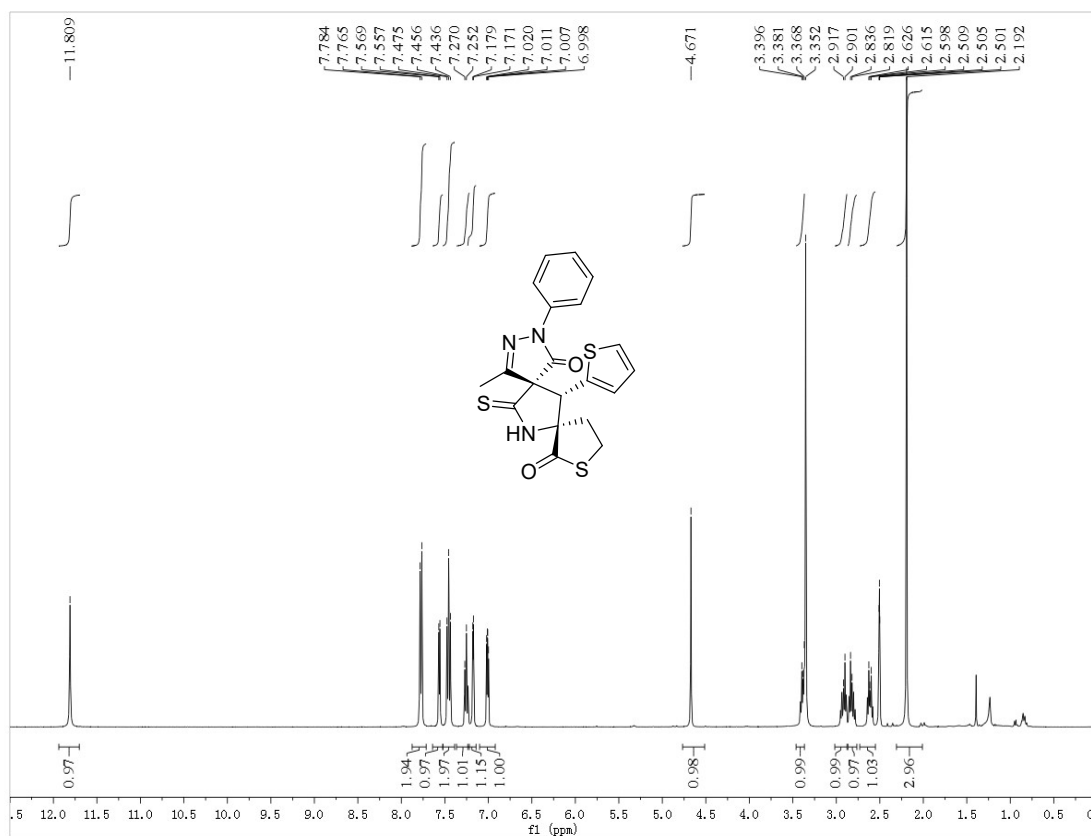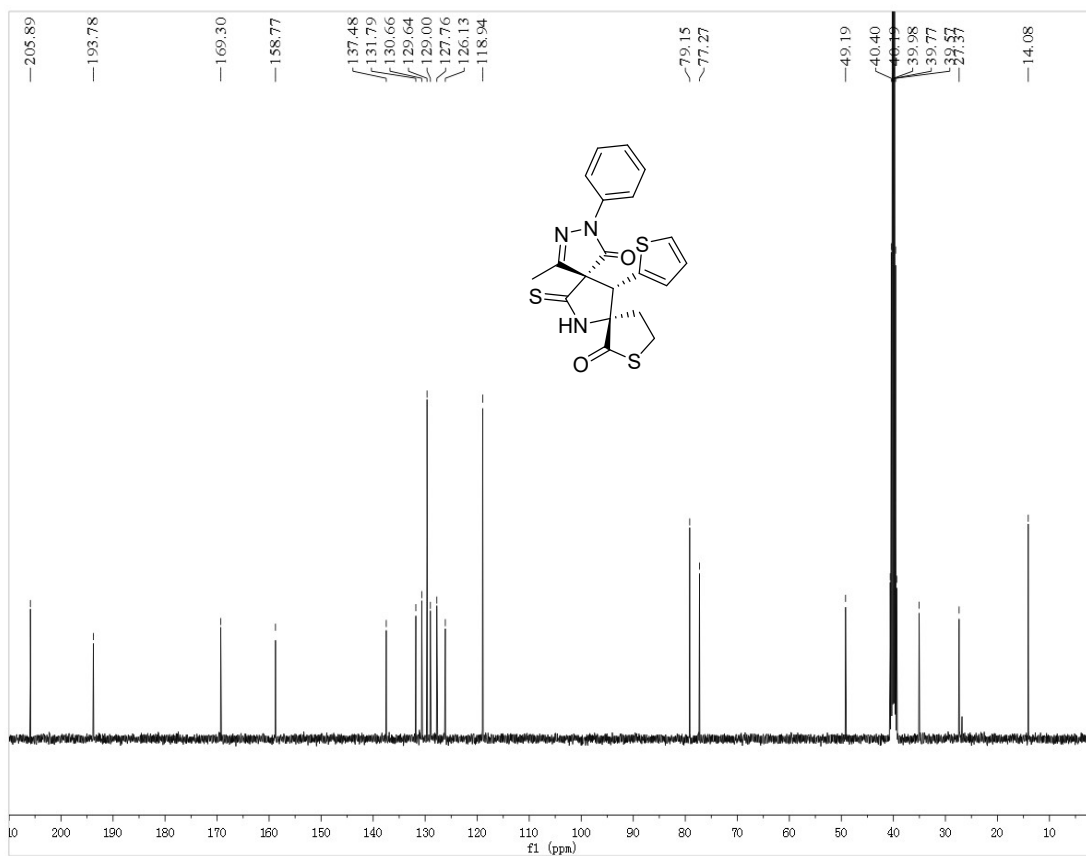

### HPLC of 3j

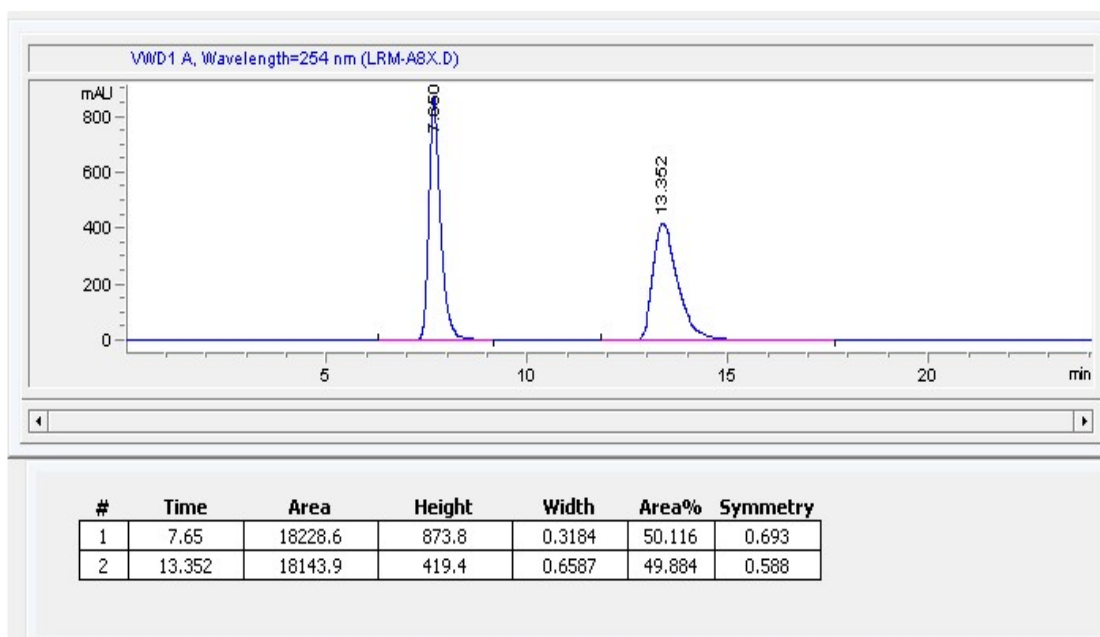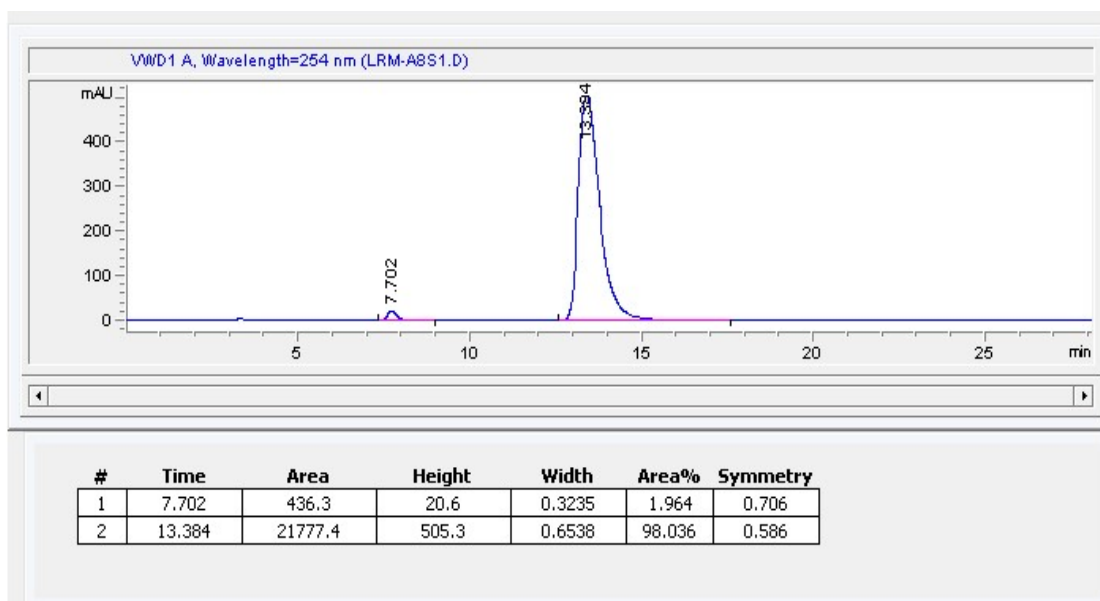

### <sup>1</sup>H and <sup>13</sup>C NMR of 3k

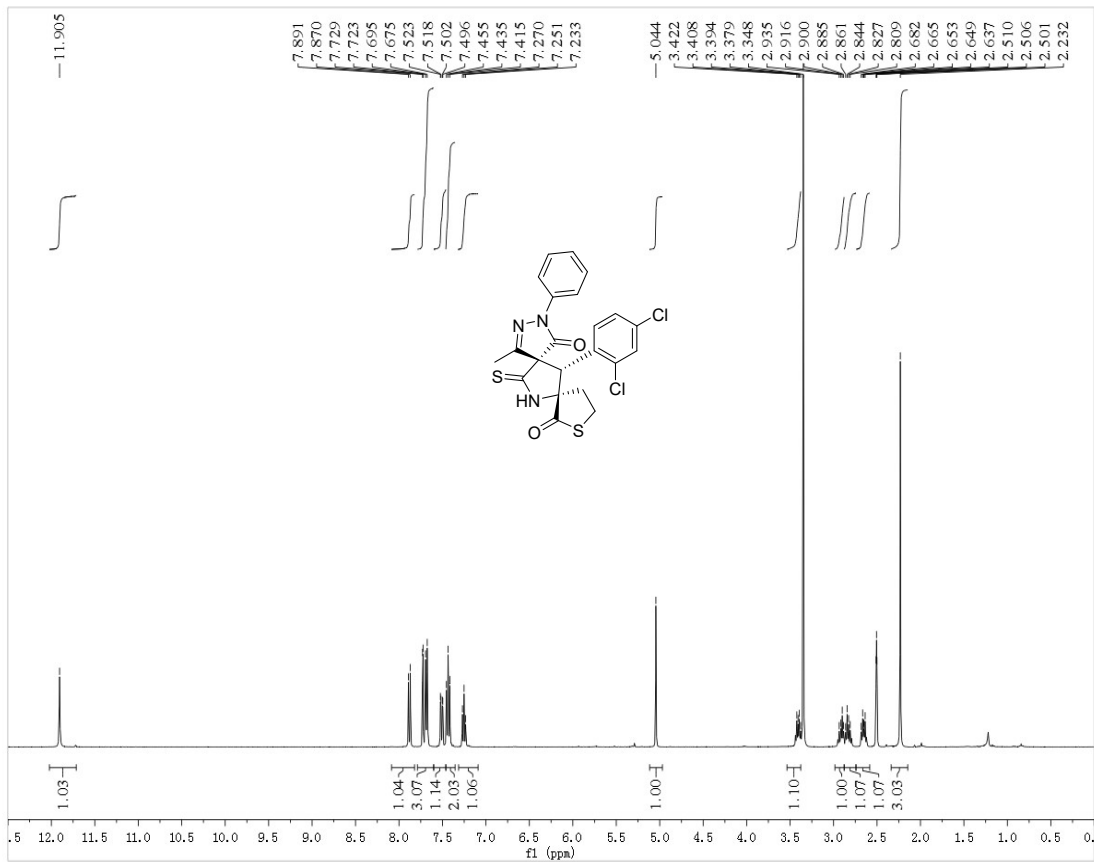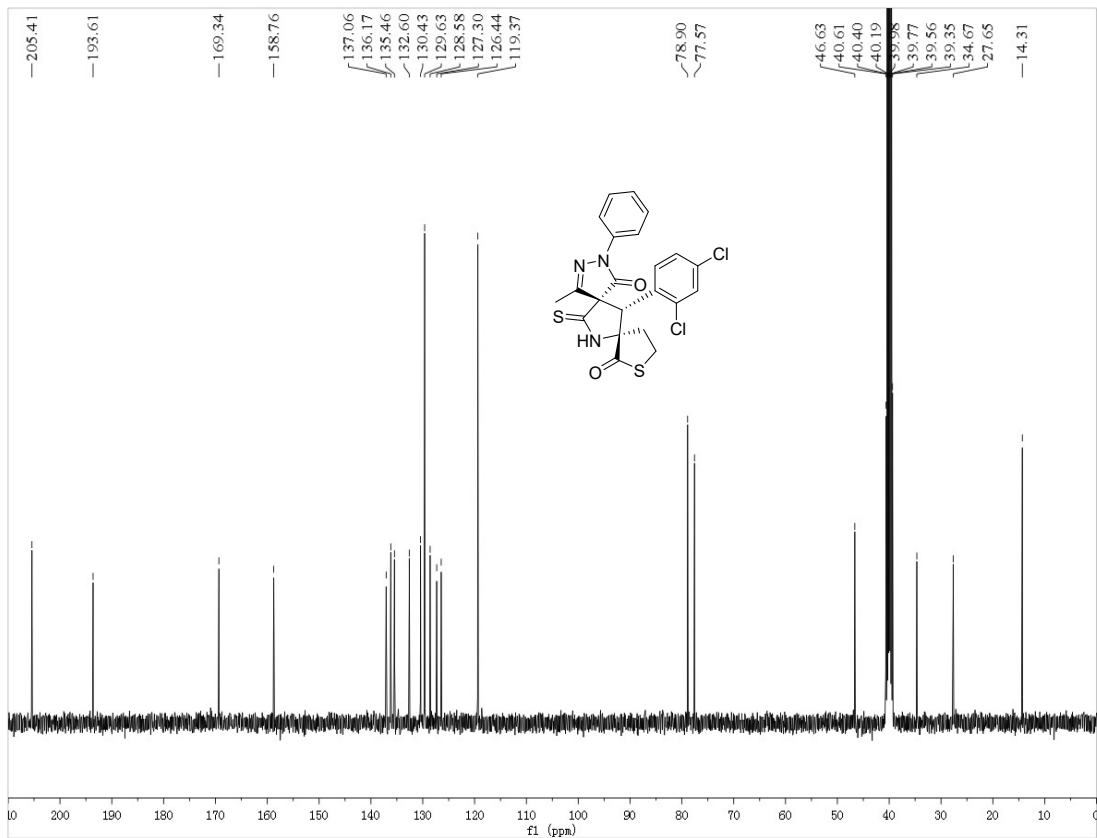

### HPLC of 3k

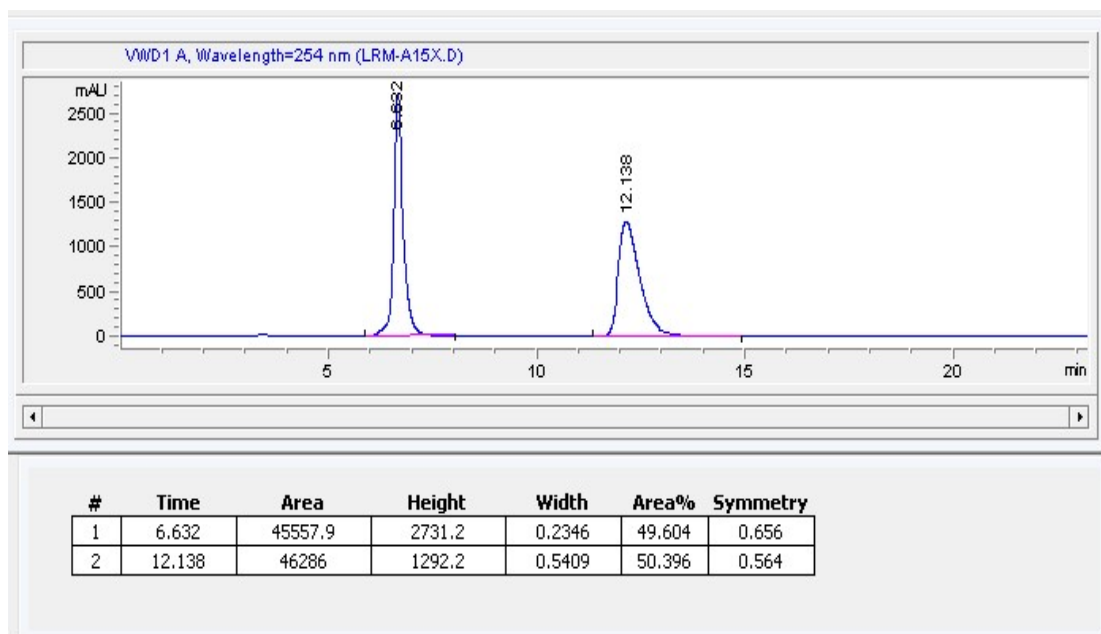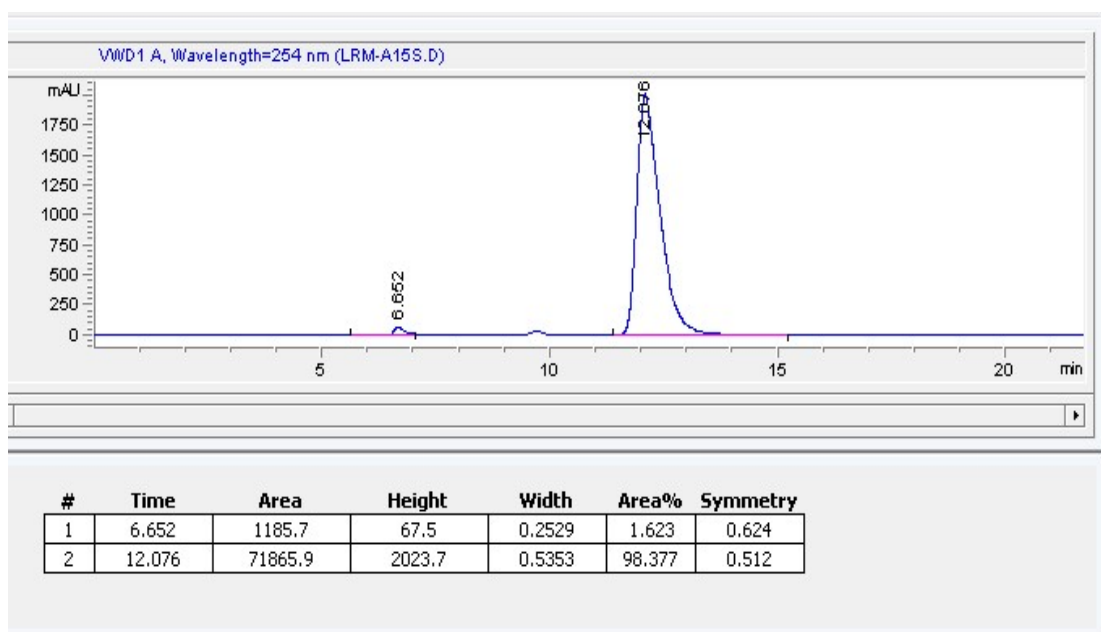



# $^1\text{H}$ and $^{13}\text{C}$ NMR of 3l

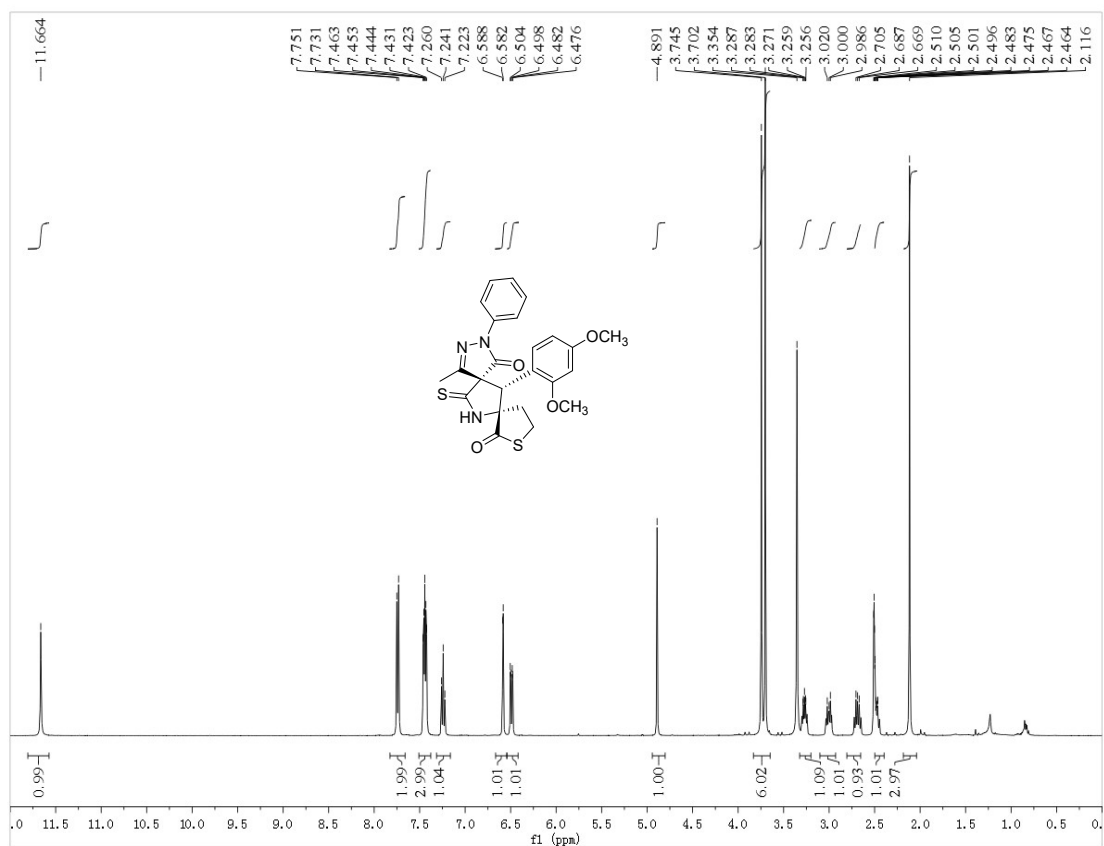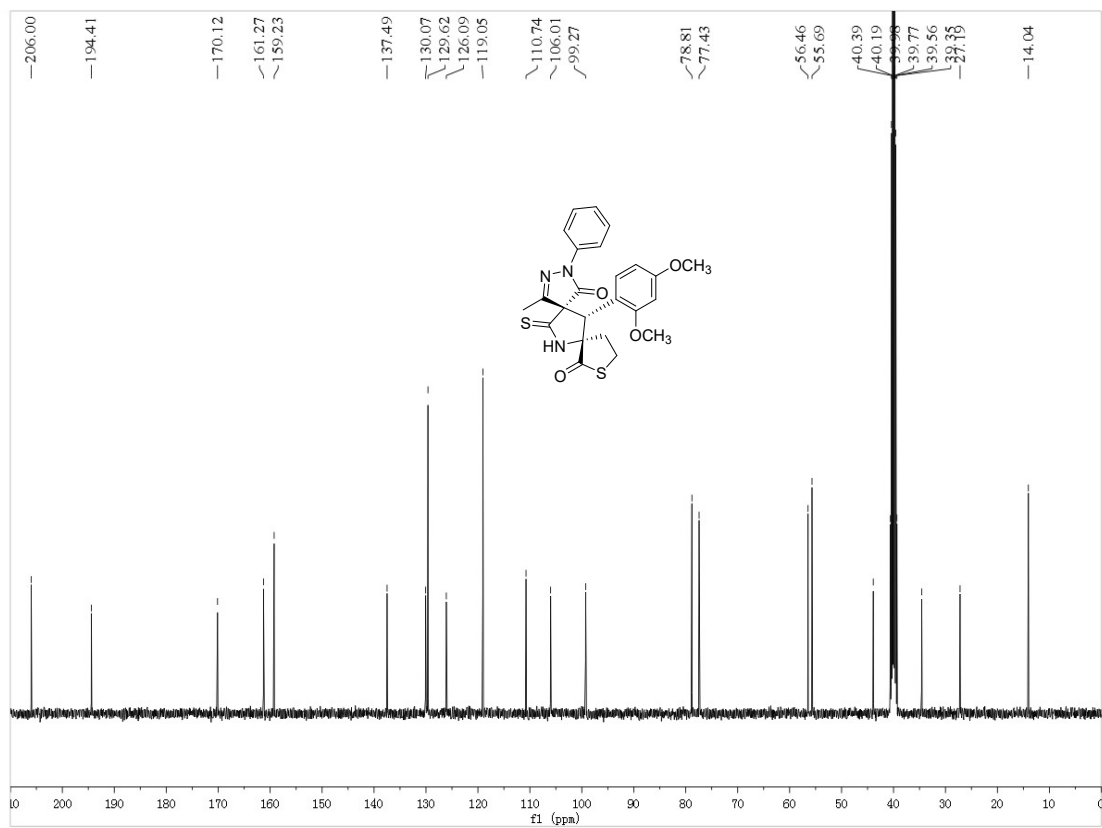

### HPLC of 31

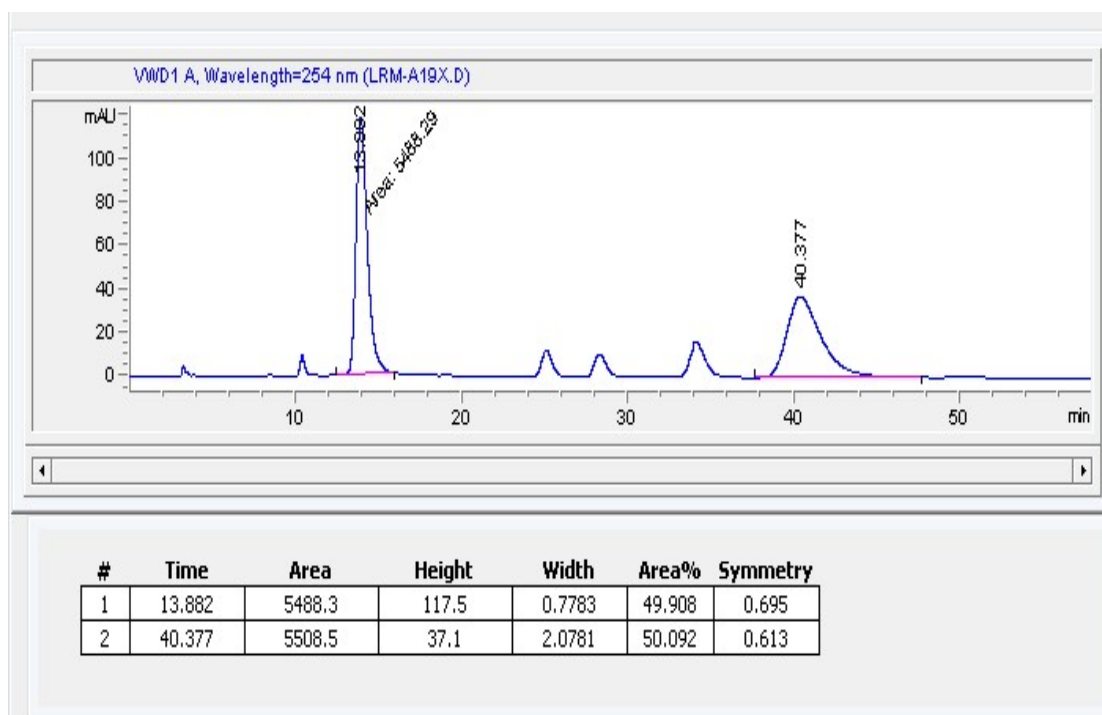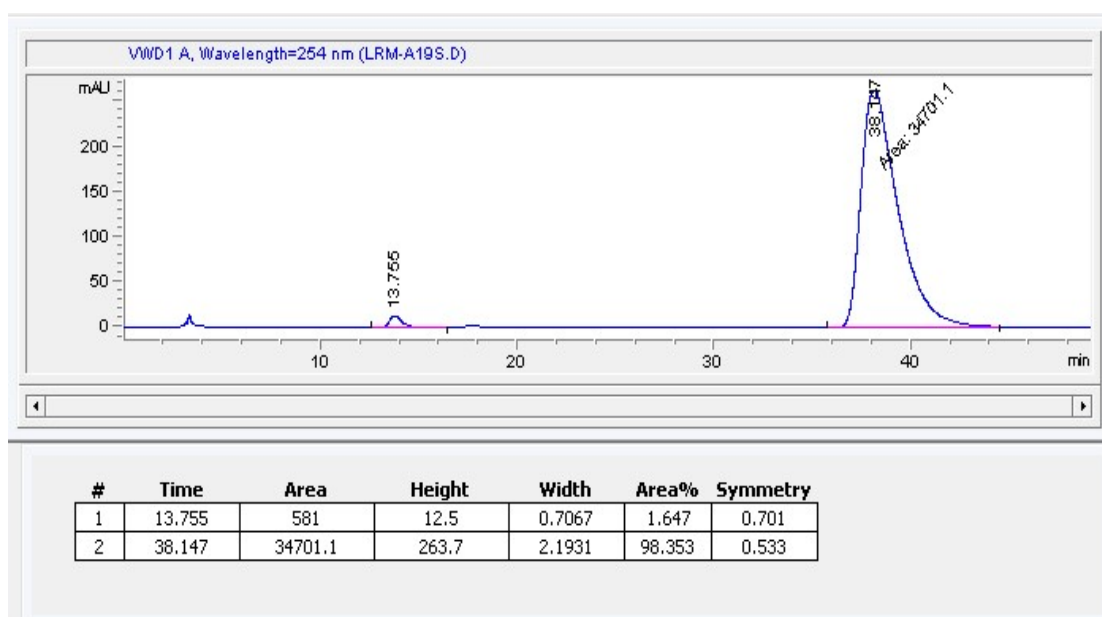

# <sup>1</sup>H and <sup>13</sup>C NMR of 3m

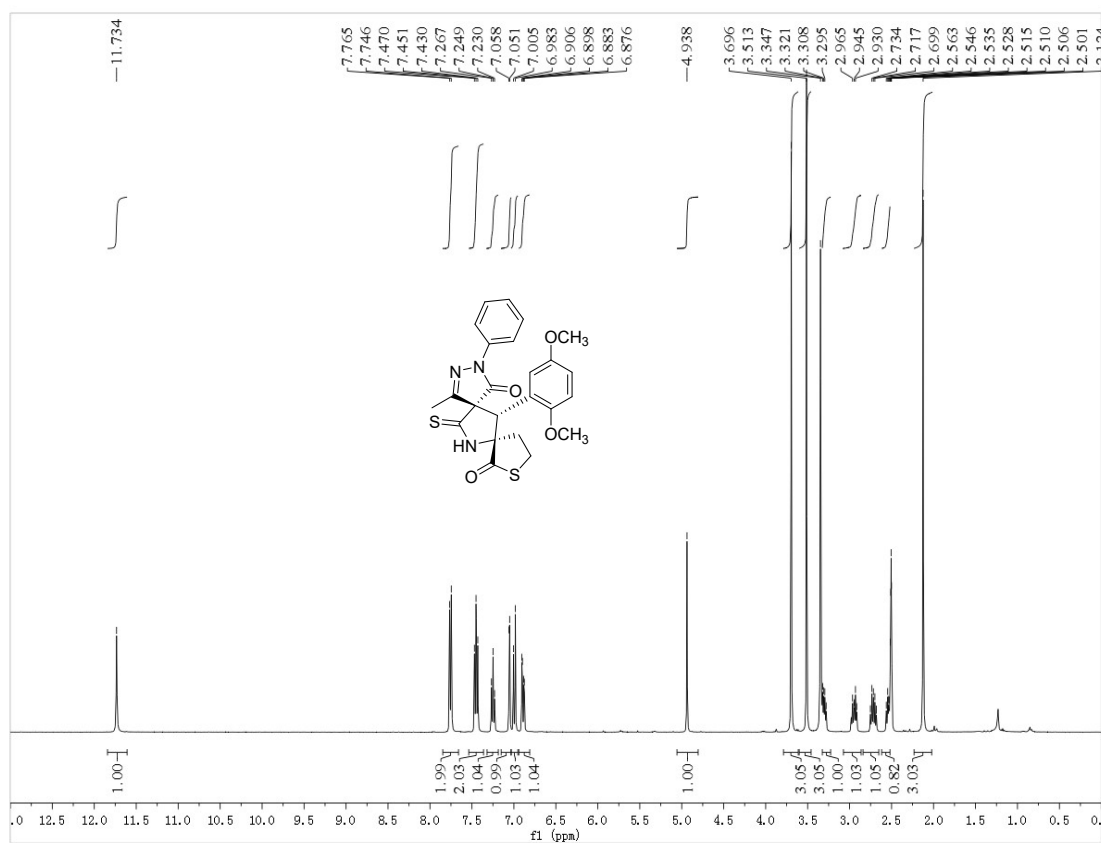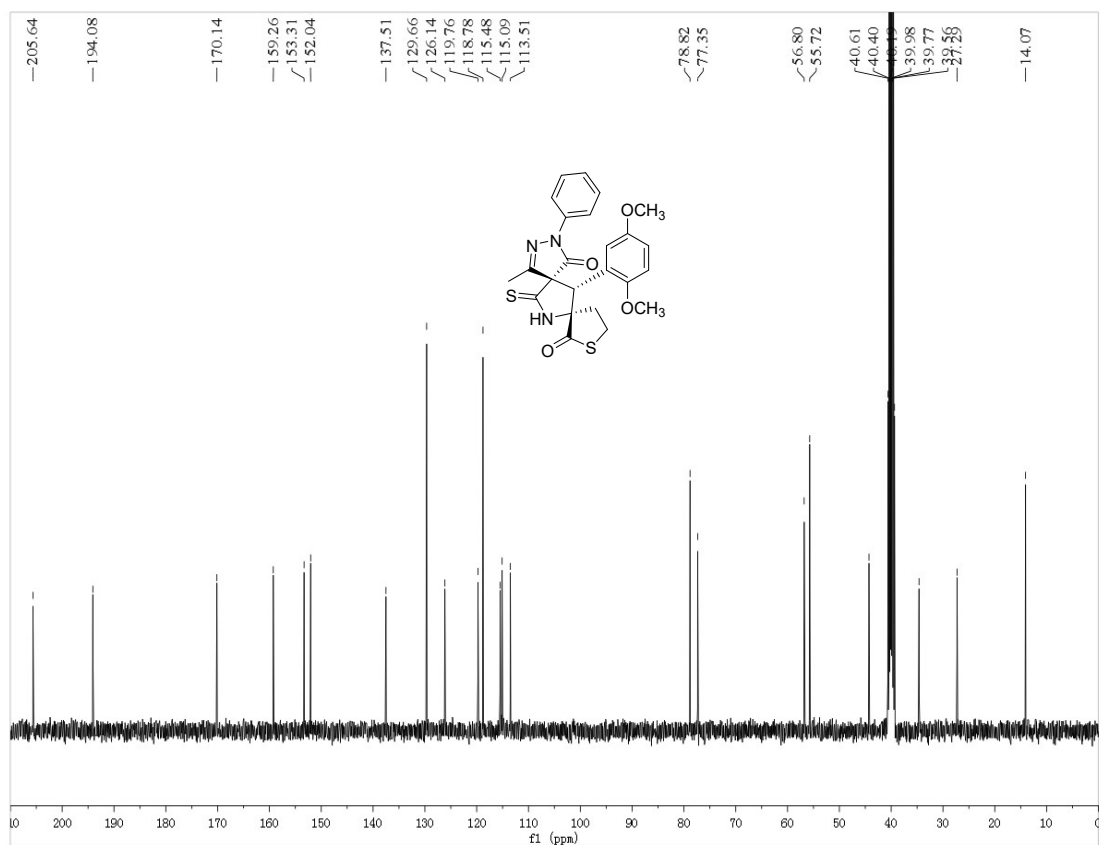

### HPLC of 3m

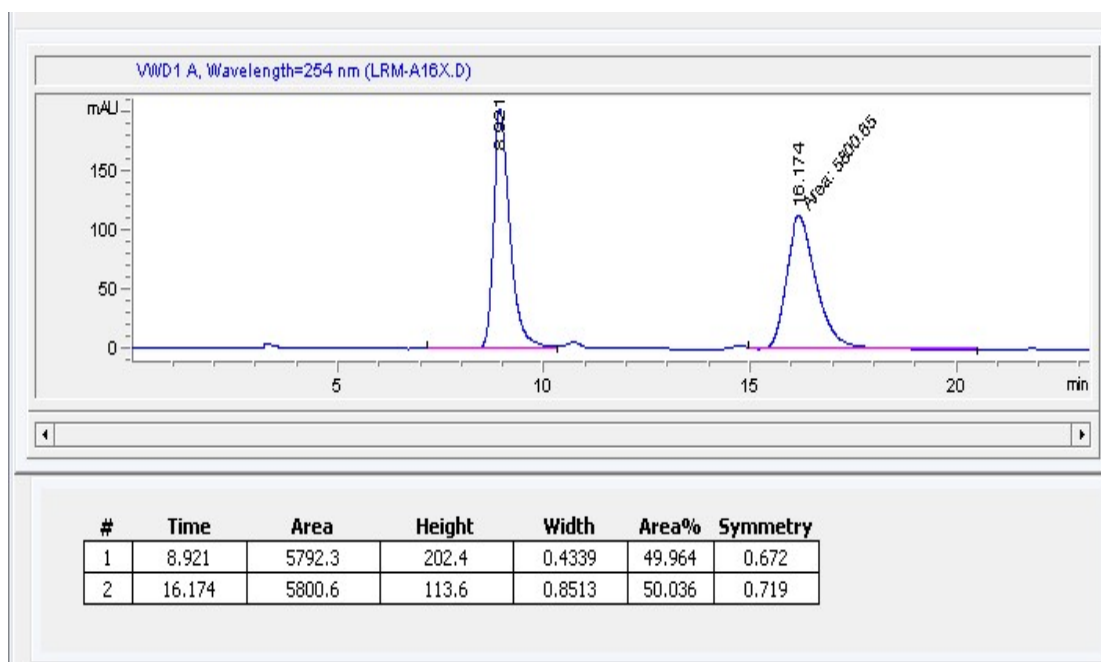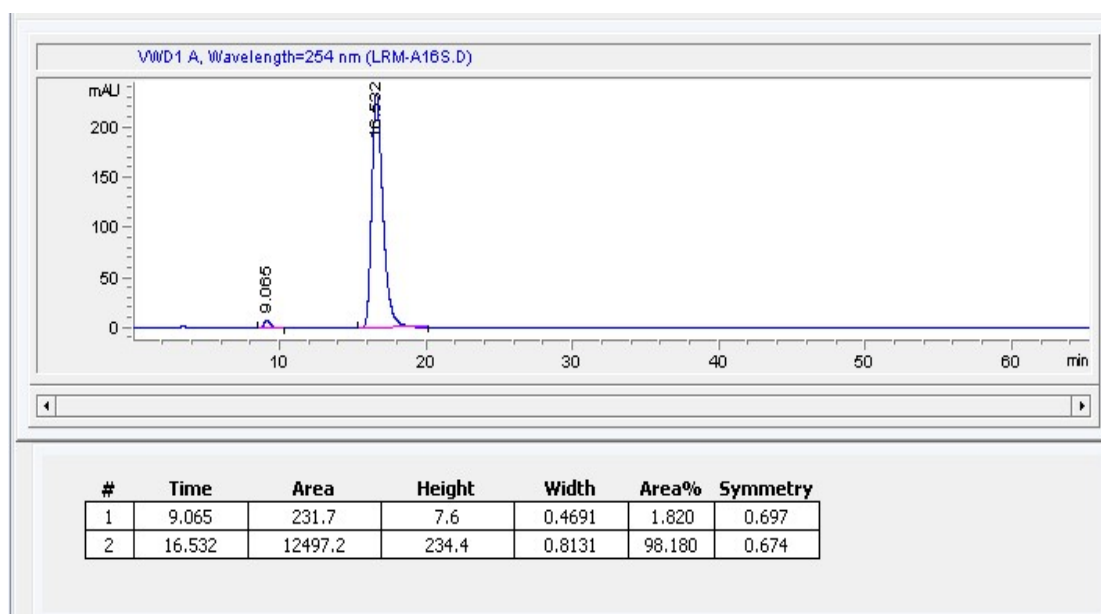

### <sup>1</sup>H and <sup>13</sup>C NMR of 3n

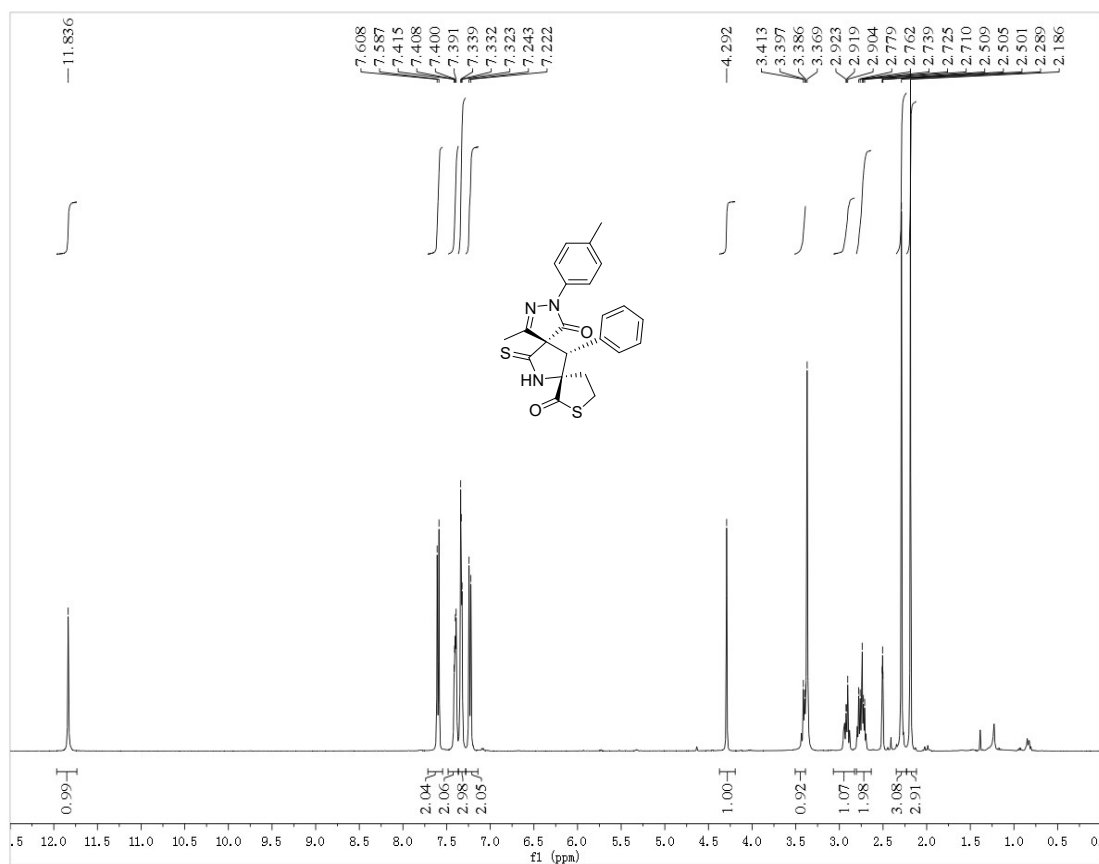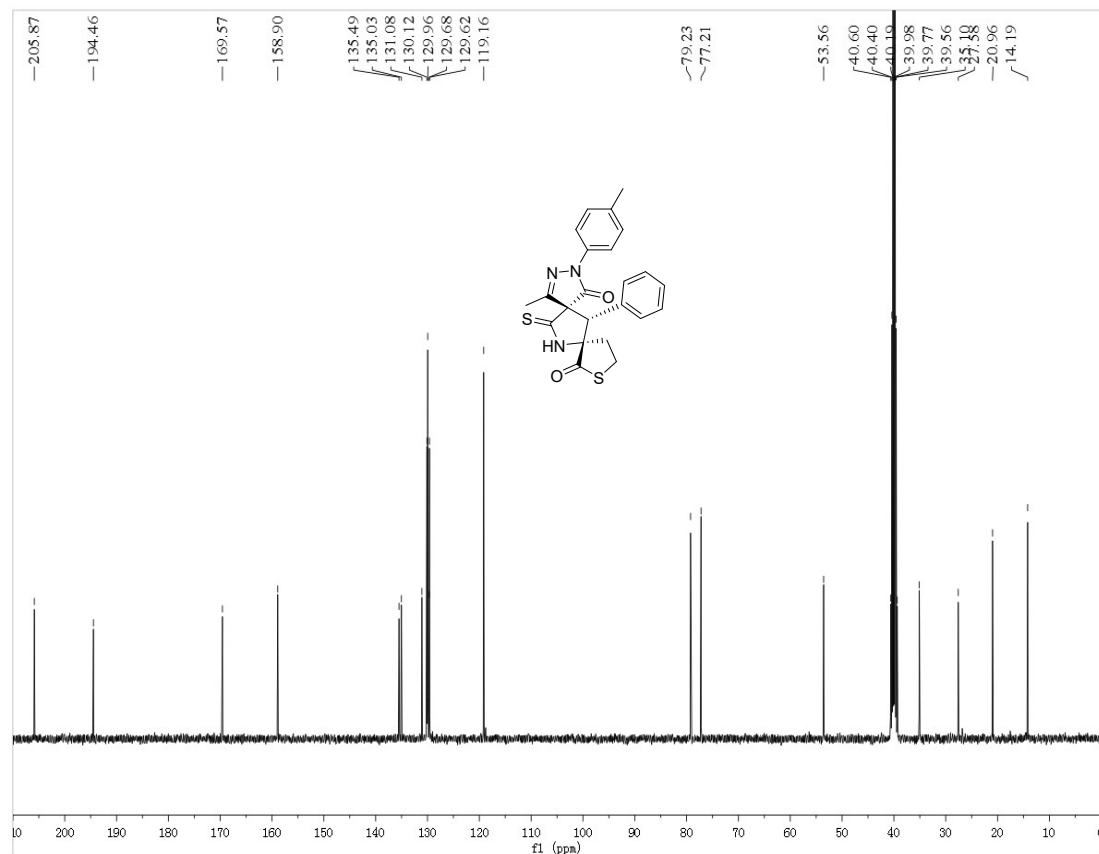

### HPLC of 3n

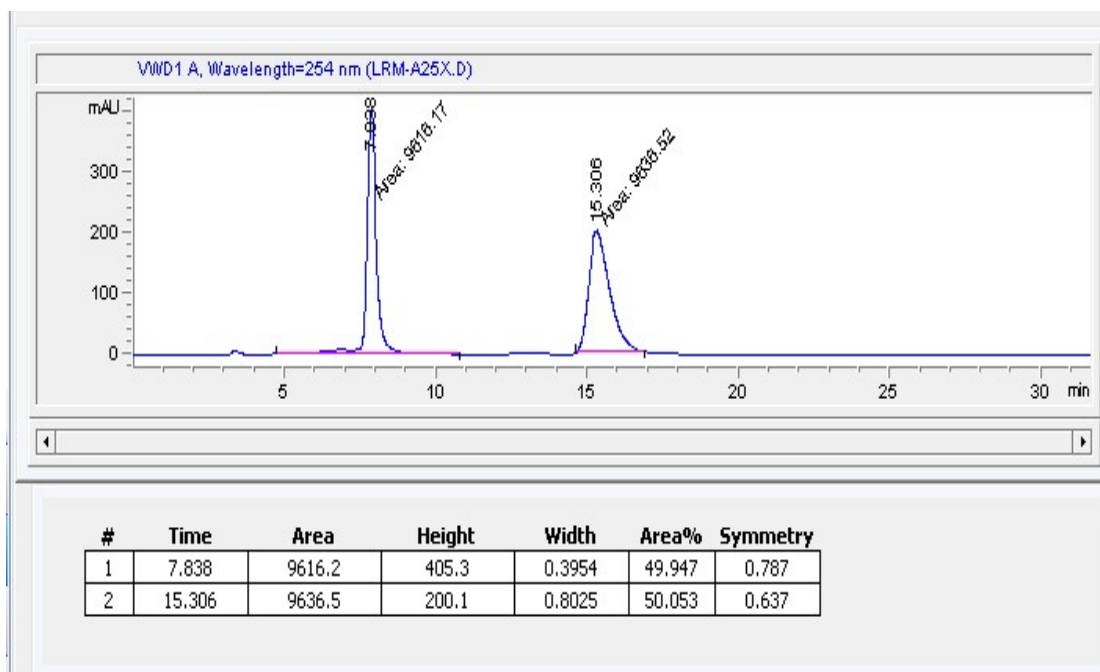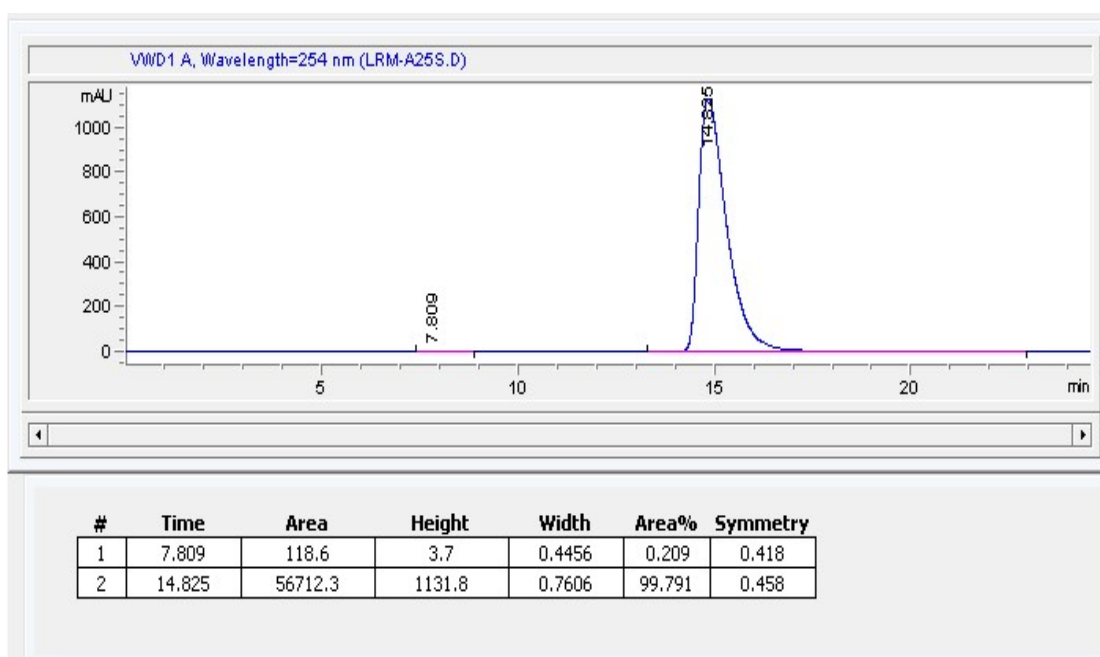

# <sup>1</sup>H and <sup>13</sup>C NMR of 3o

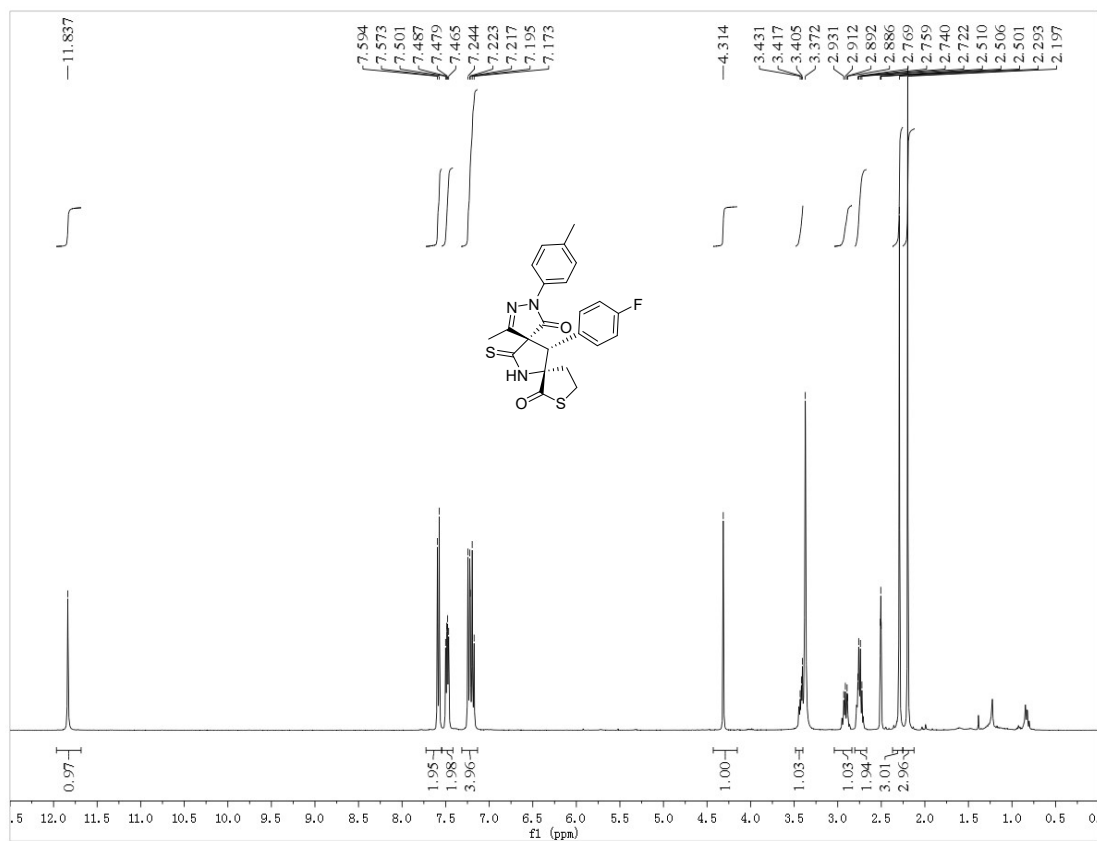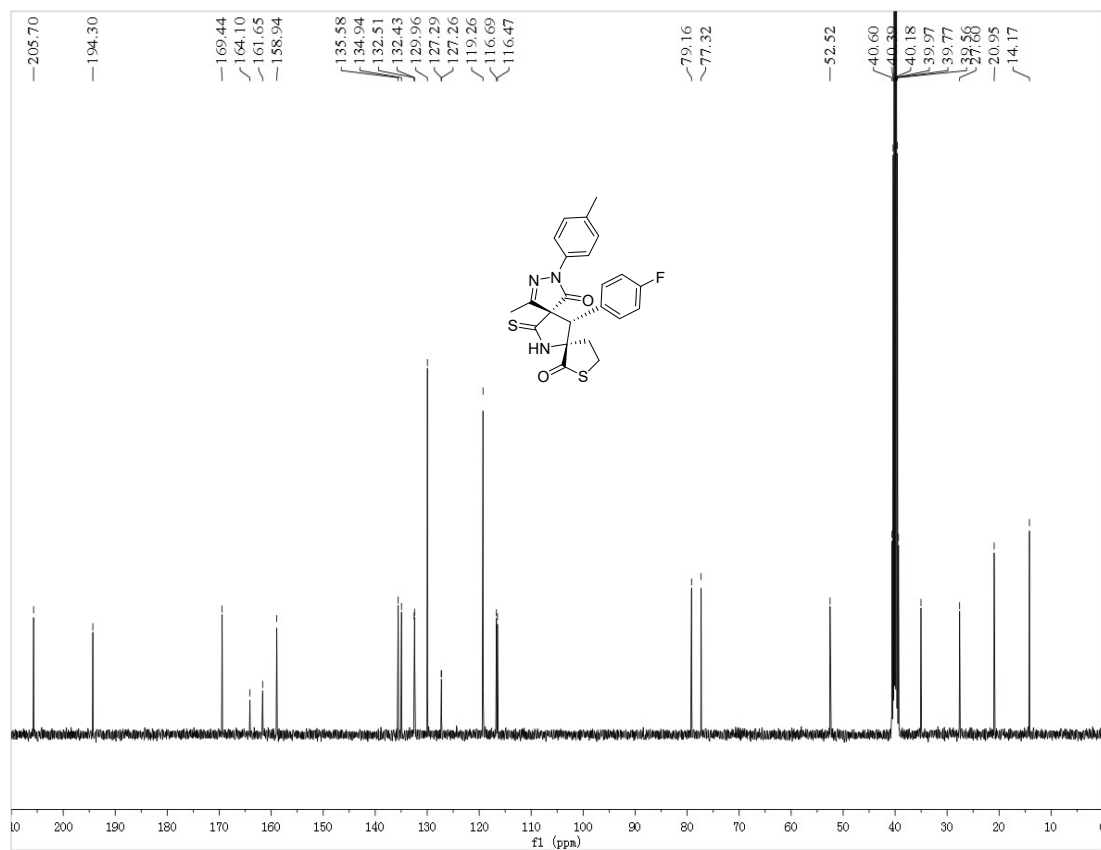

**<sup>19</sup>F NMR of 3o**

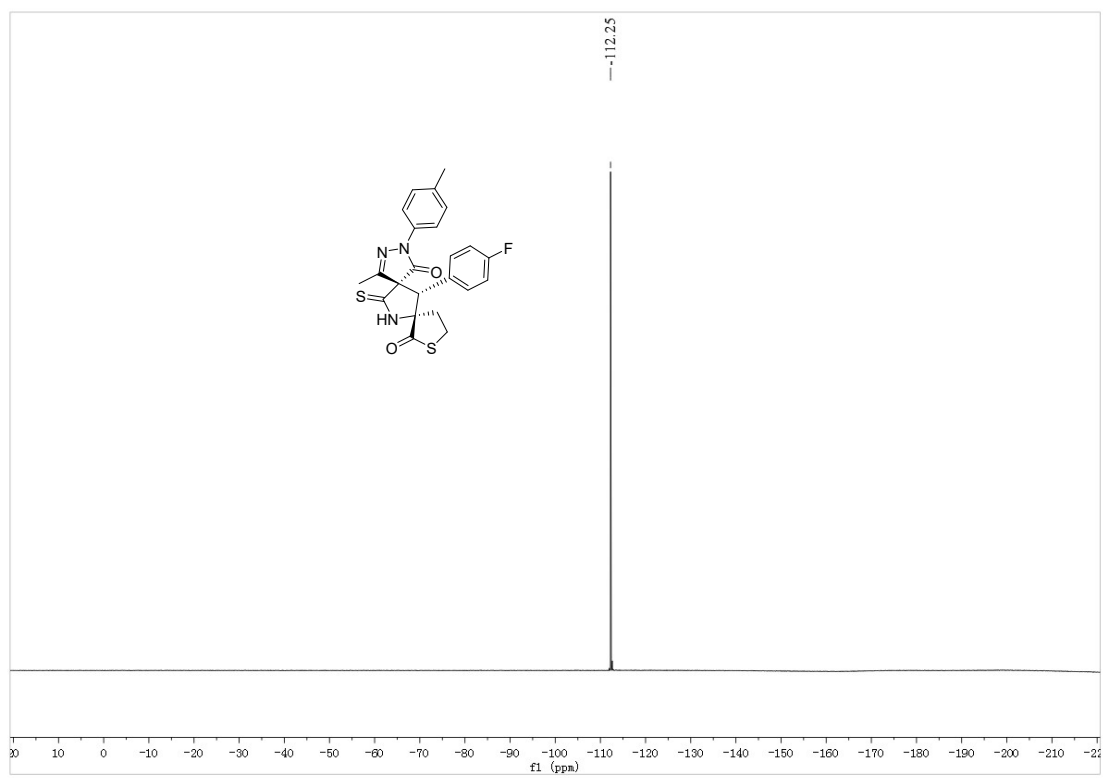



### HPLC of 3o

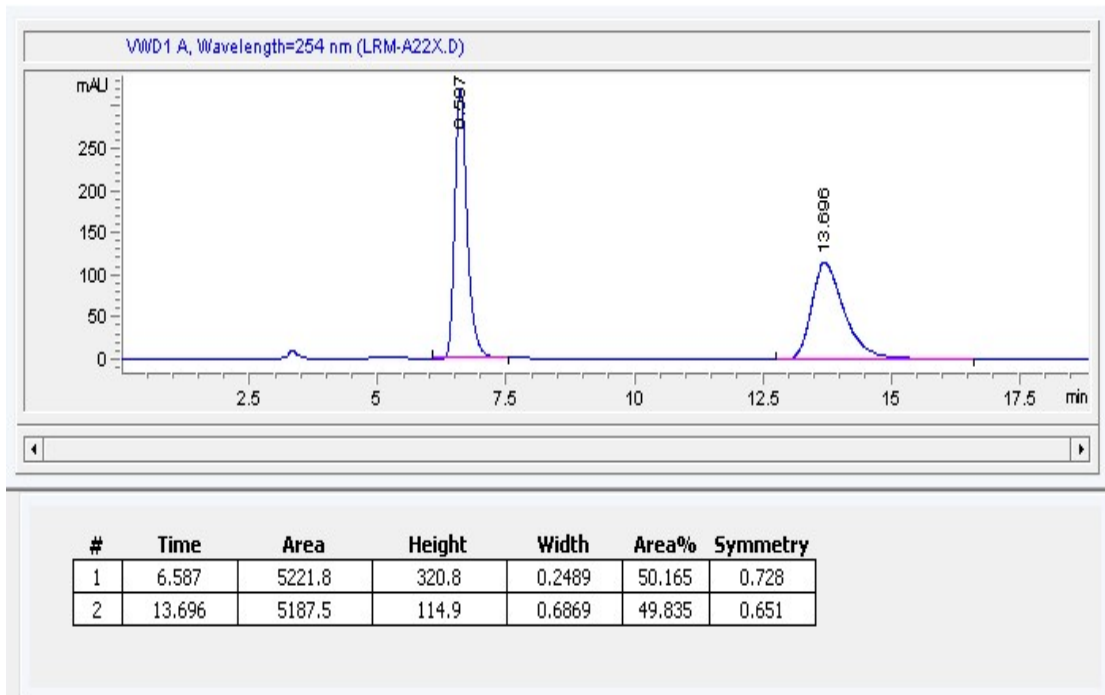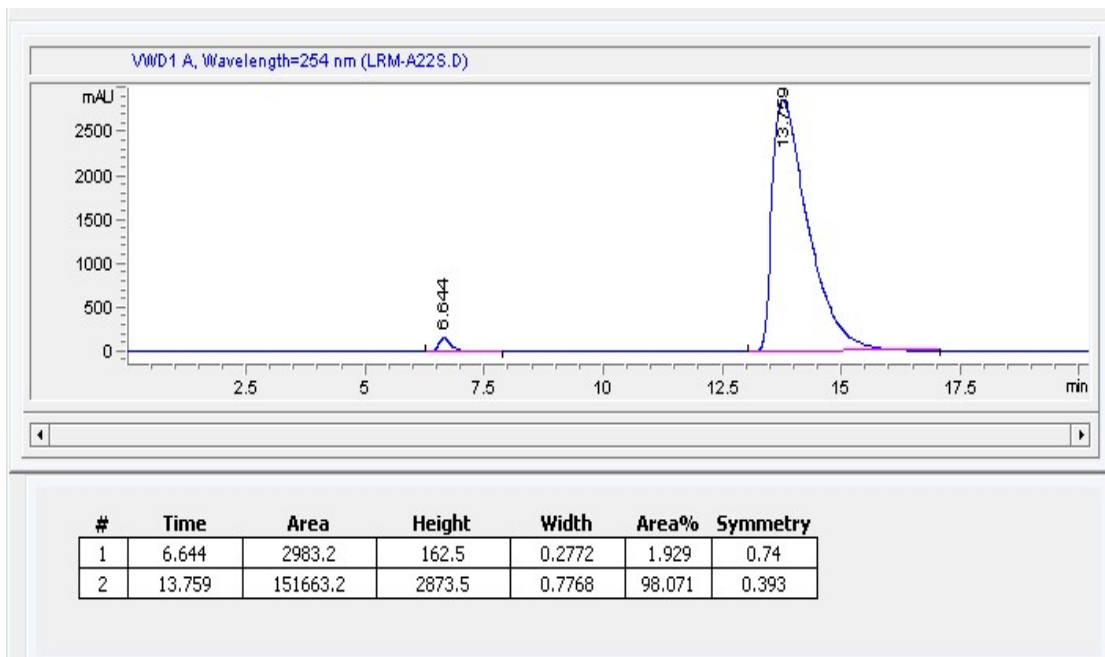

# <sup>1</sup>H and <sup>13</sup>C NMR of 3p

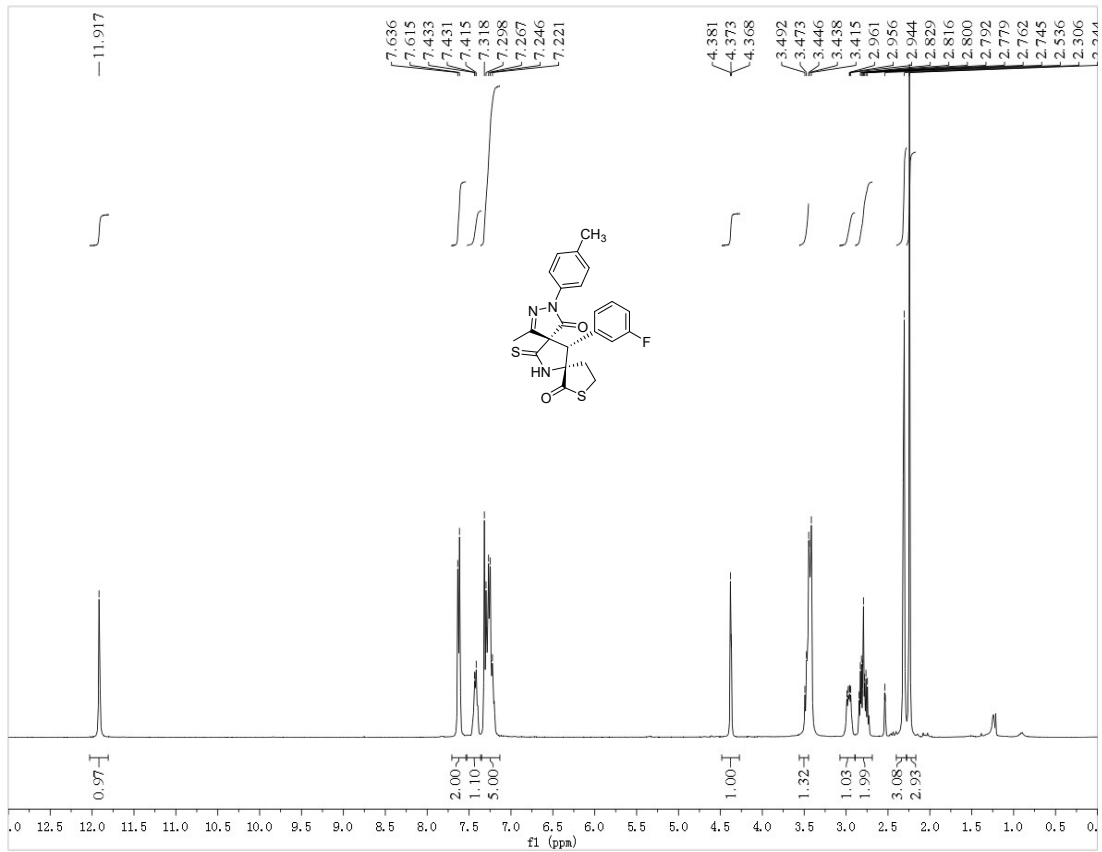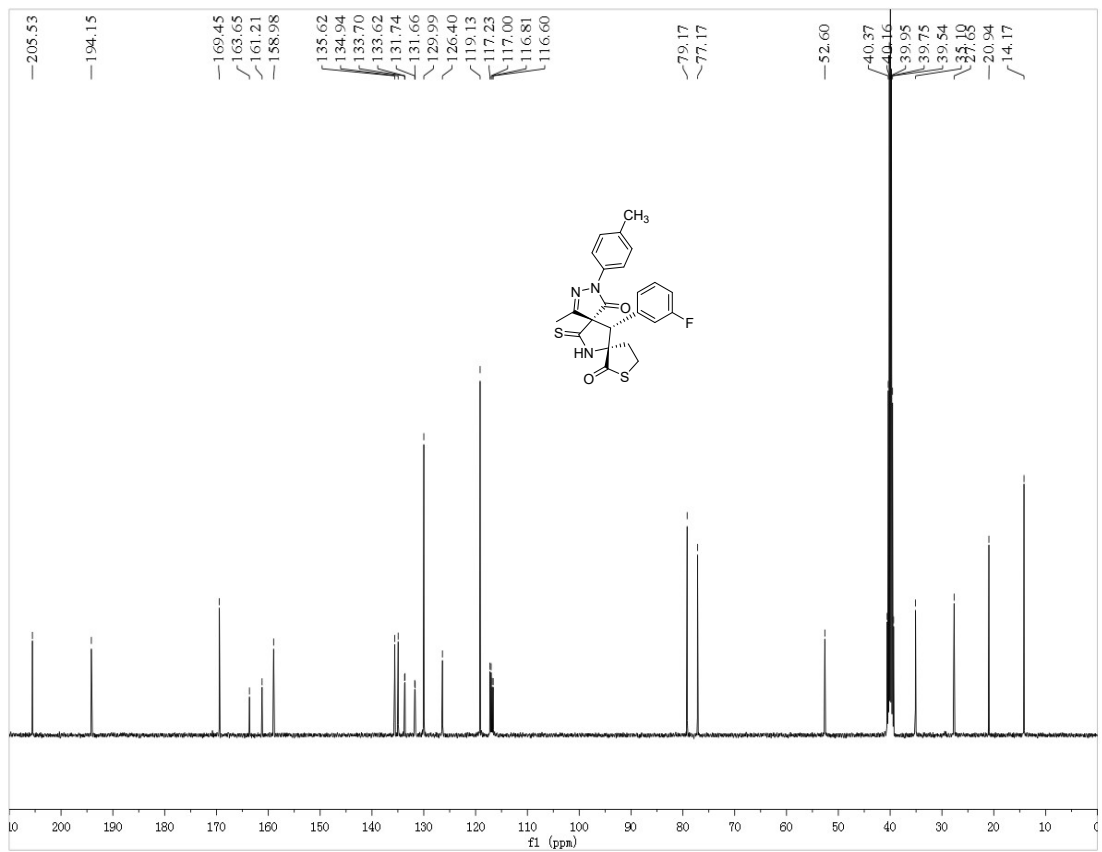

# <sup>19</sup>F NMR of 3p

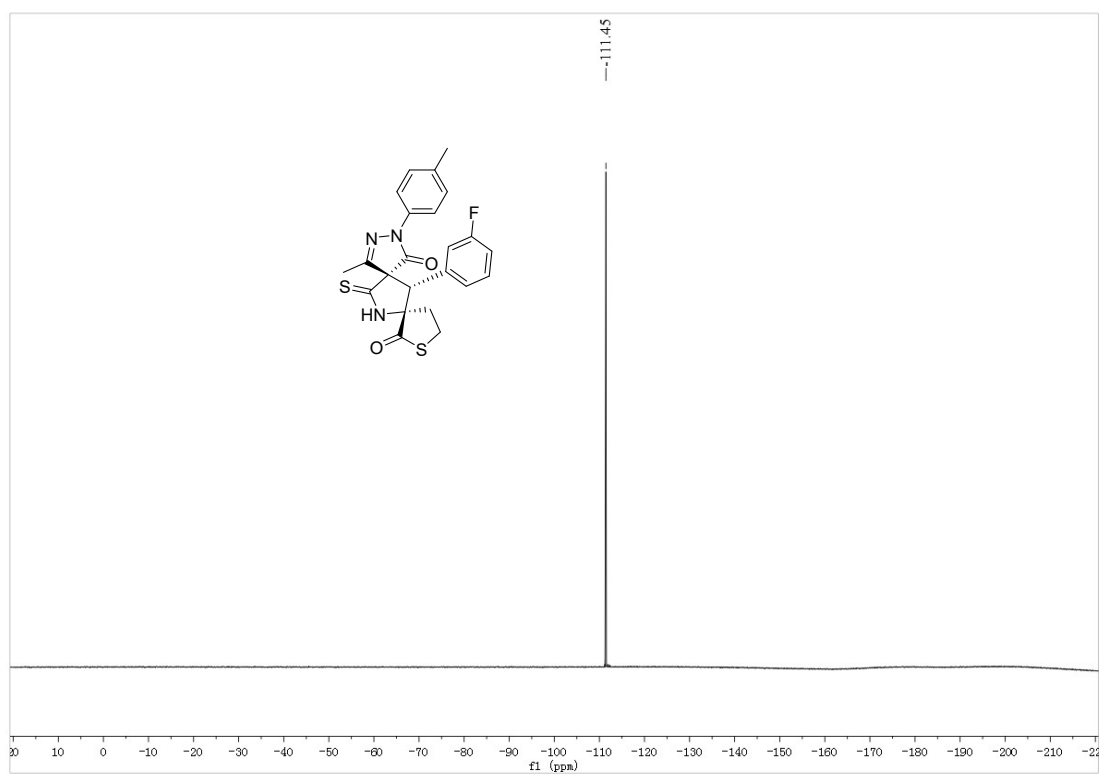

### HPLC of 3p

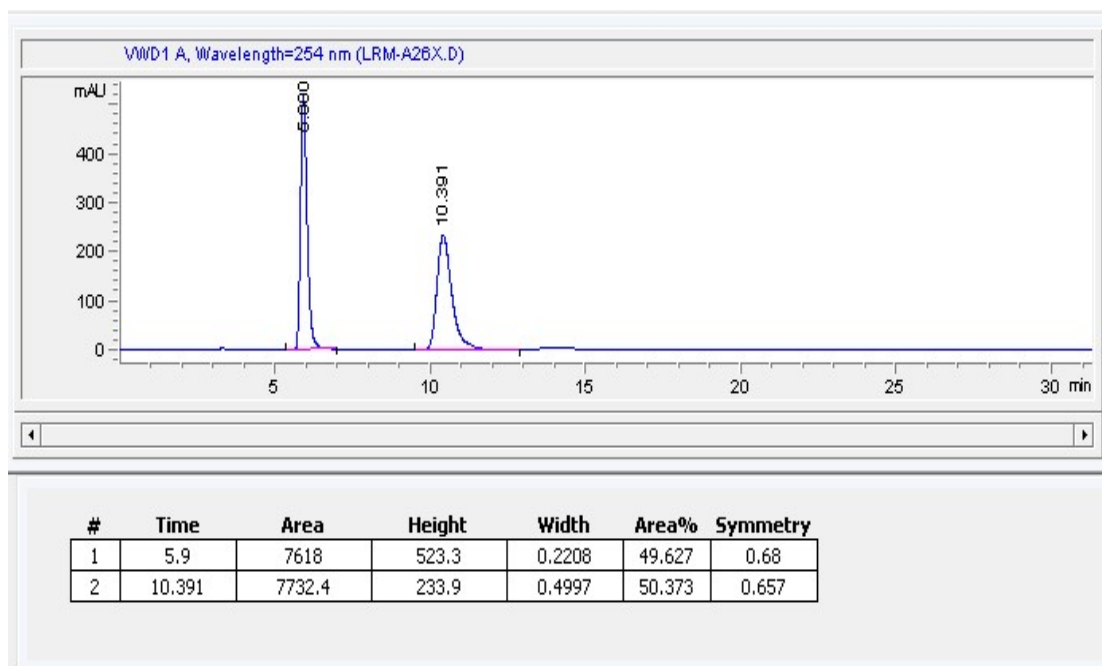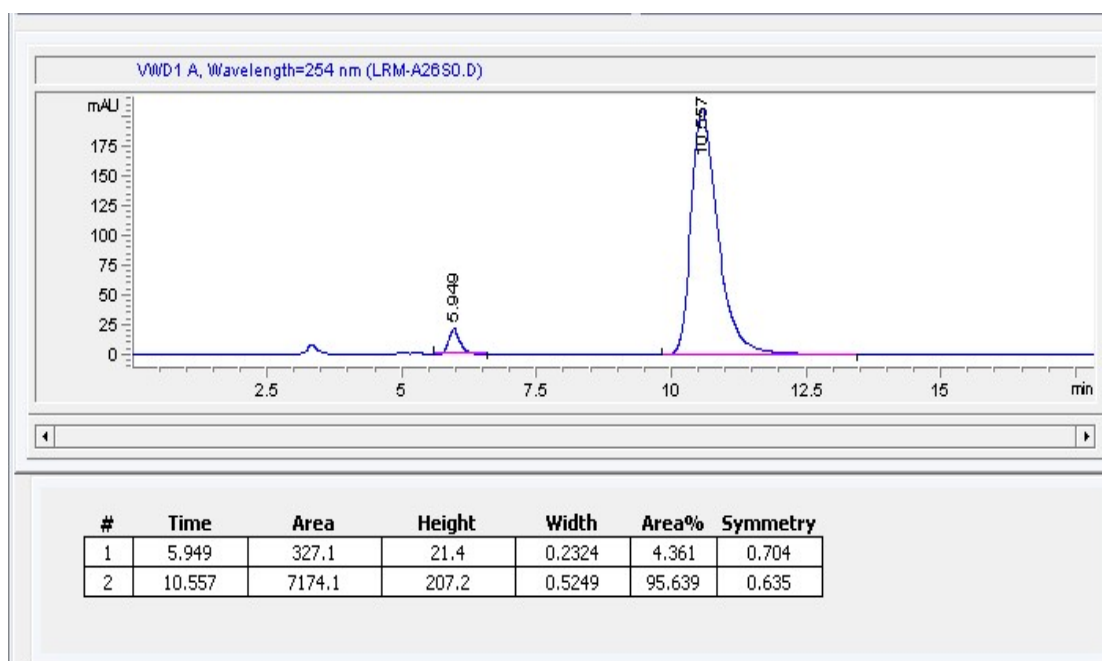

# <sup>1</sup>H and <sup>13</sup>C NMR of 3q

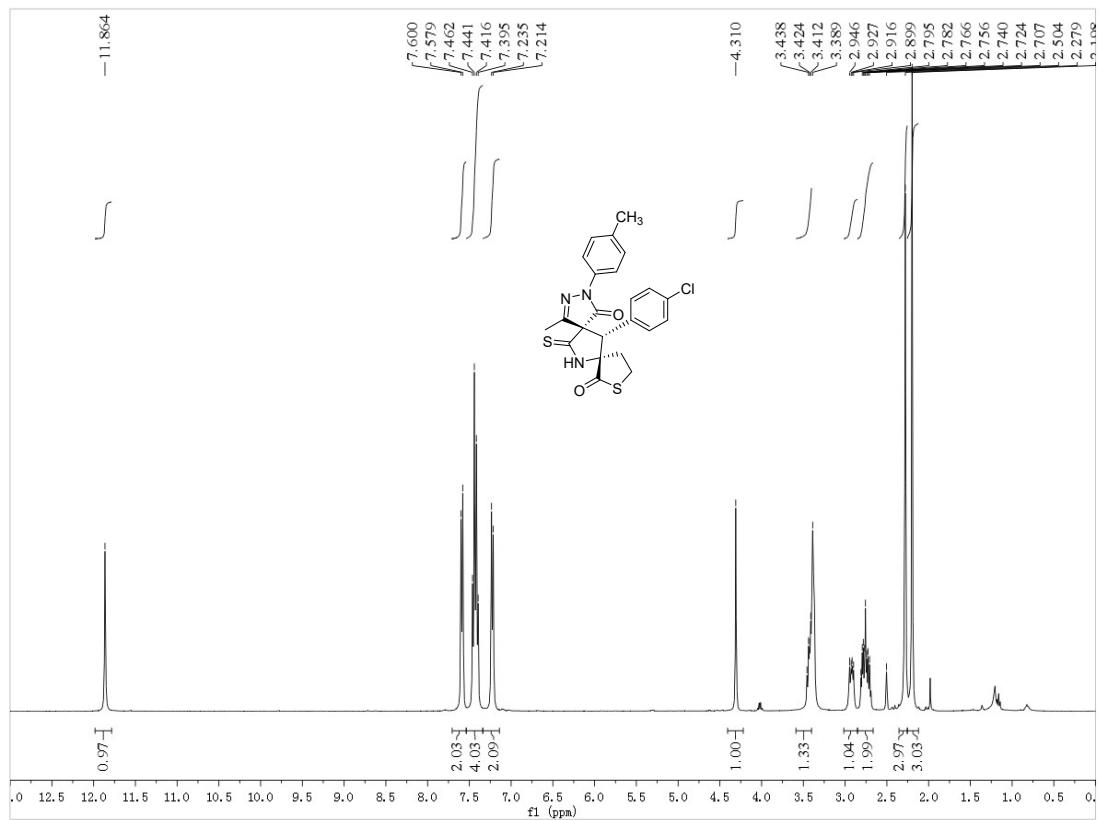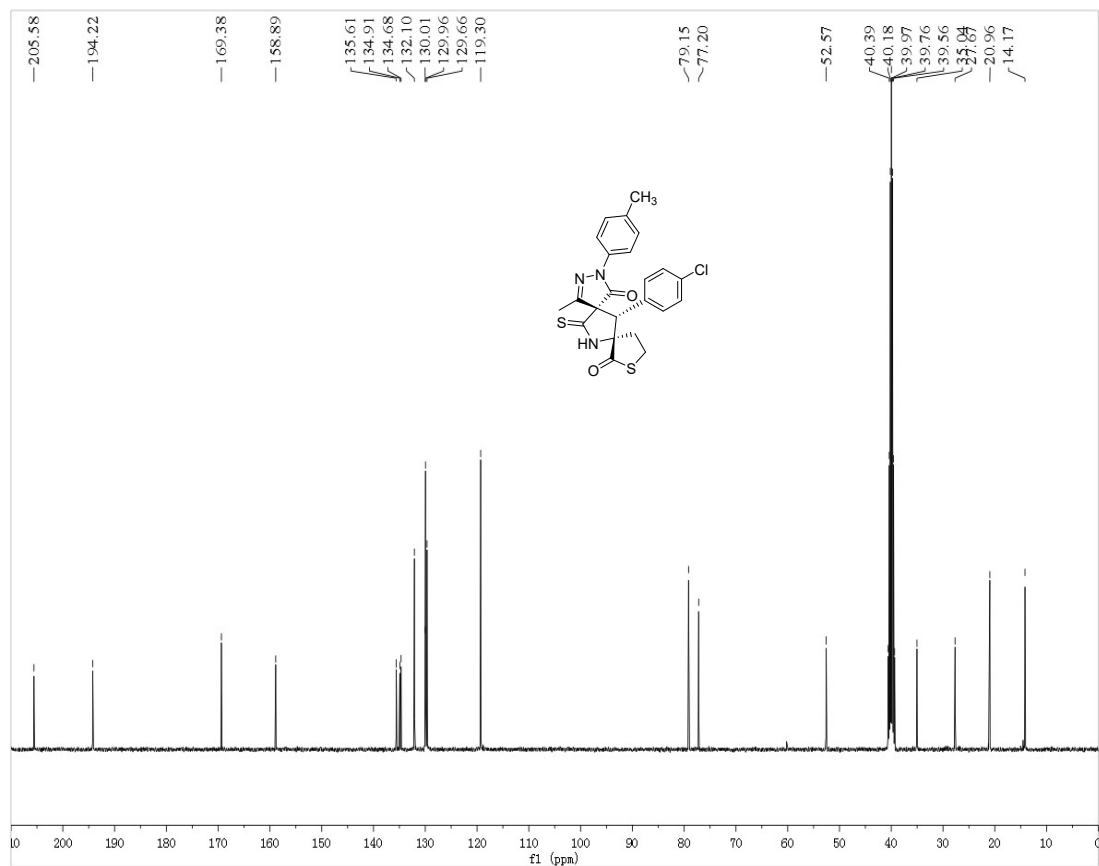

### HPLC of 3q

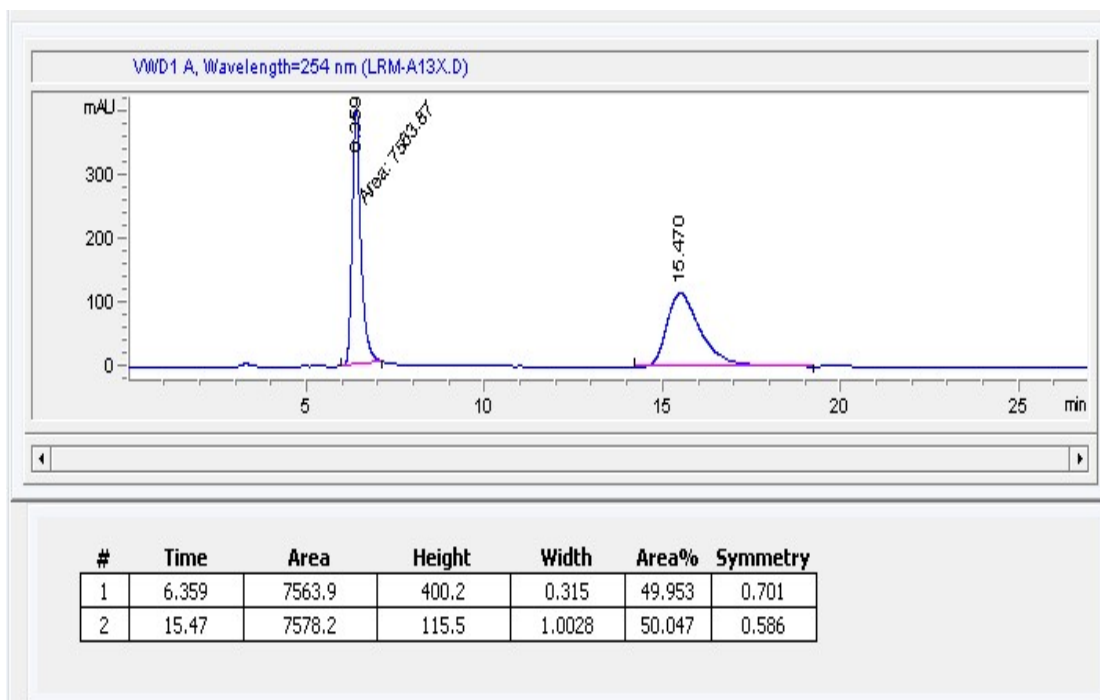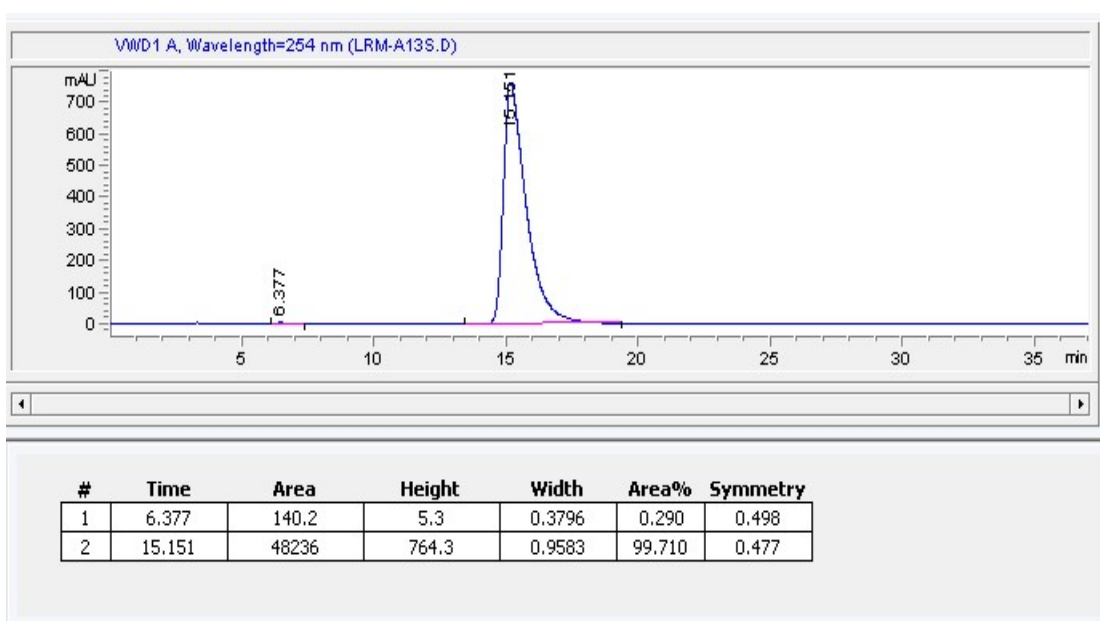

# <sup>1</sup>H and <sup>13</sup>C NMR of 3r

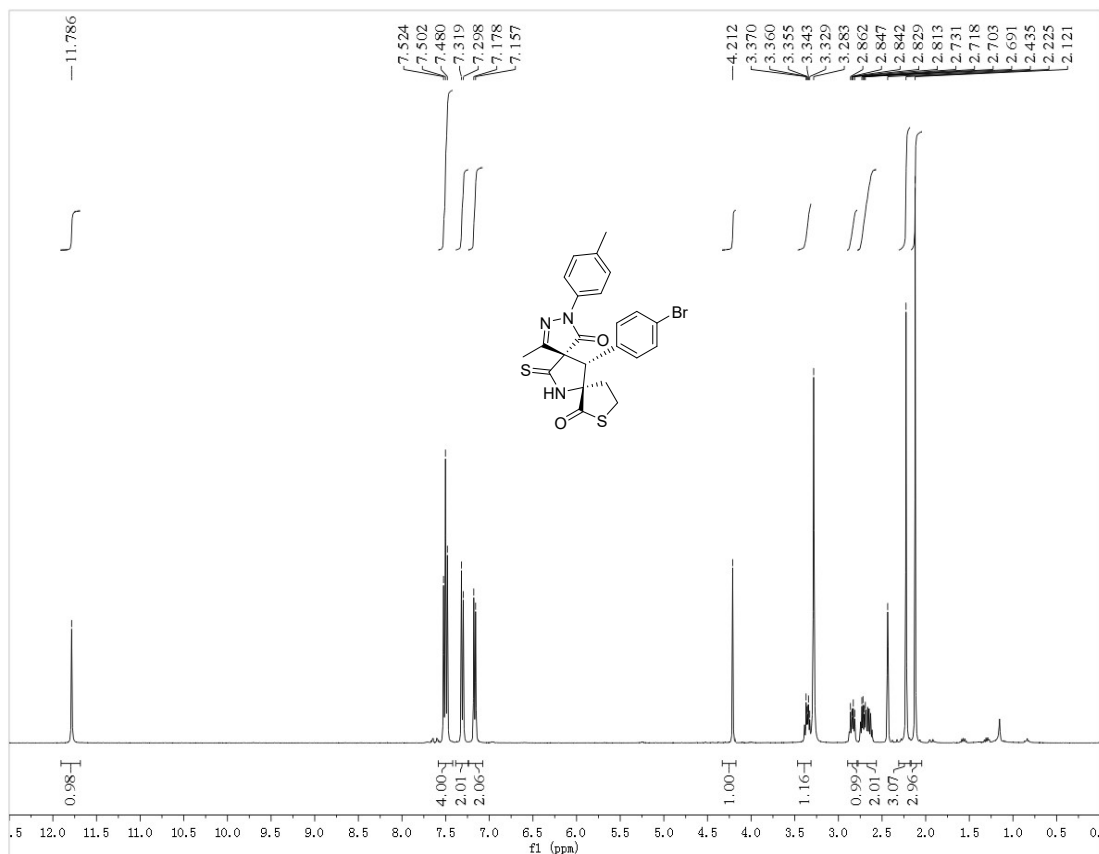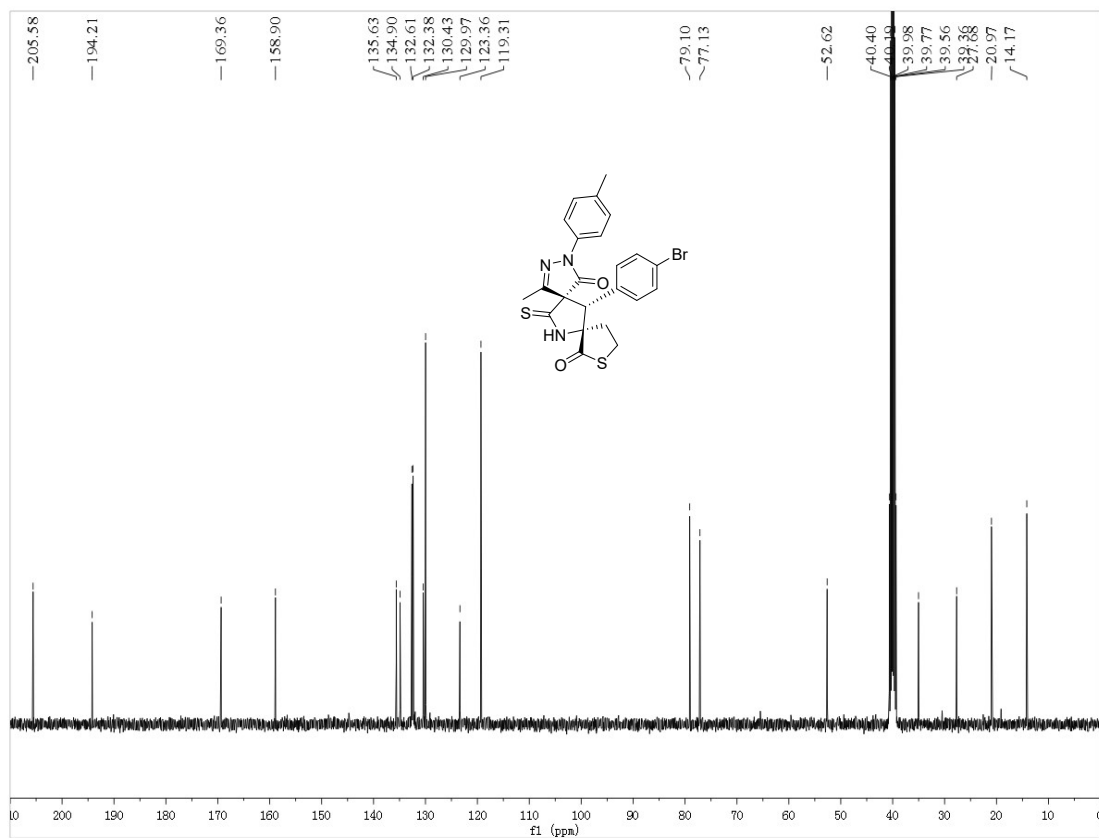

### HPLC of 3r

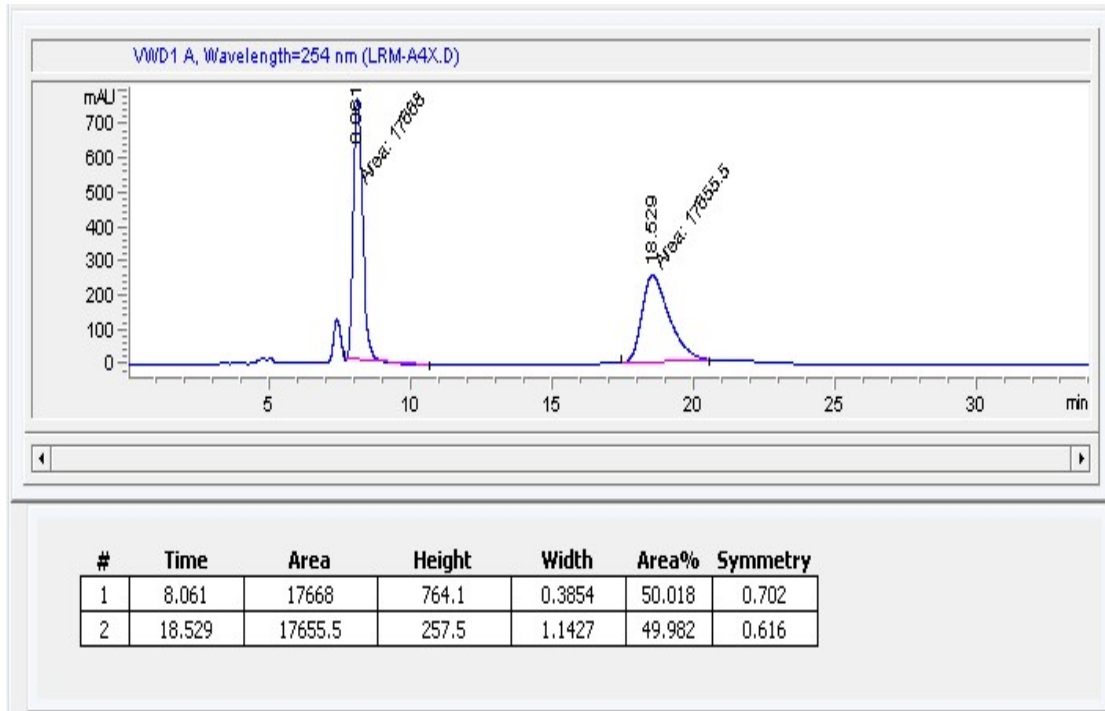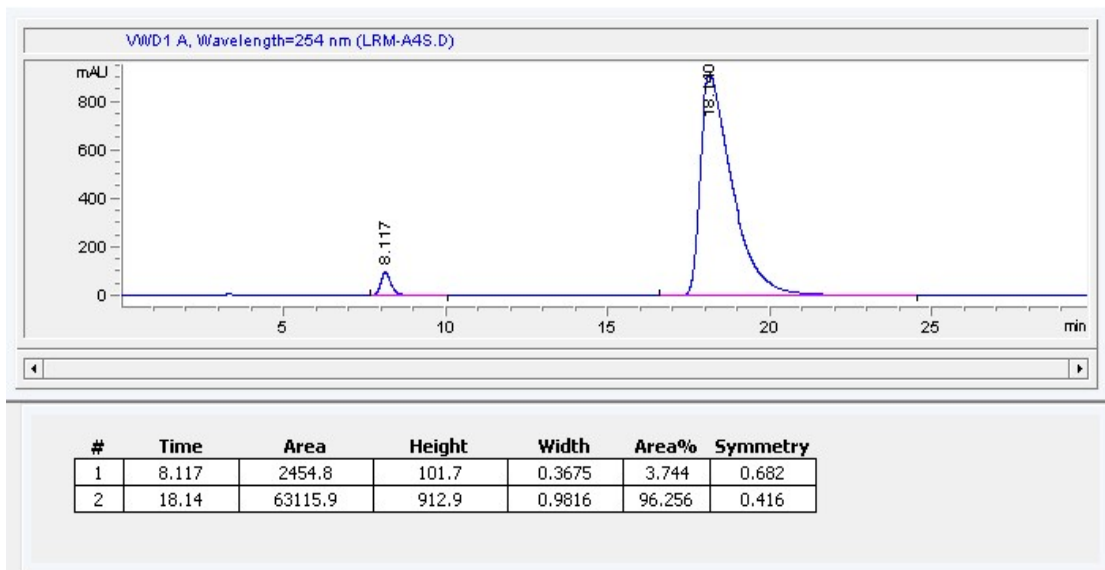



# <sup>1</sup>H and <sup>13</sup>C NMR of 3s

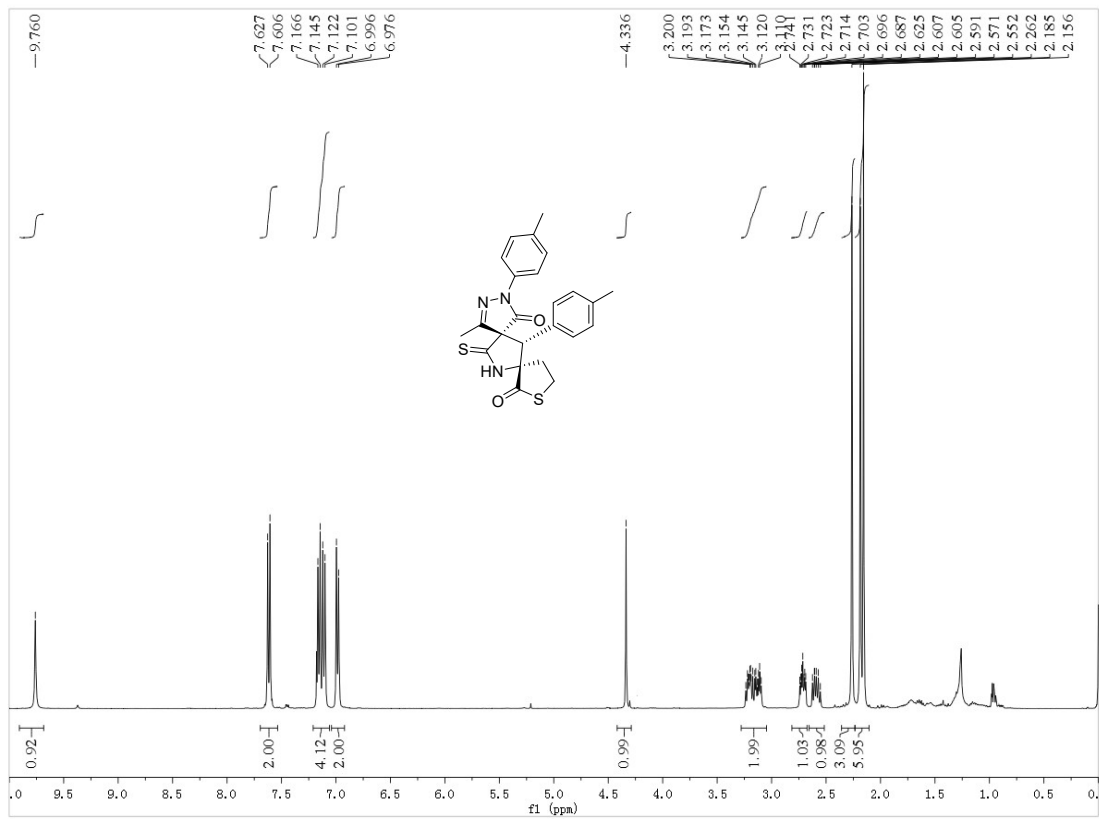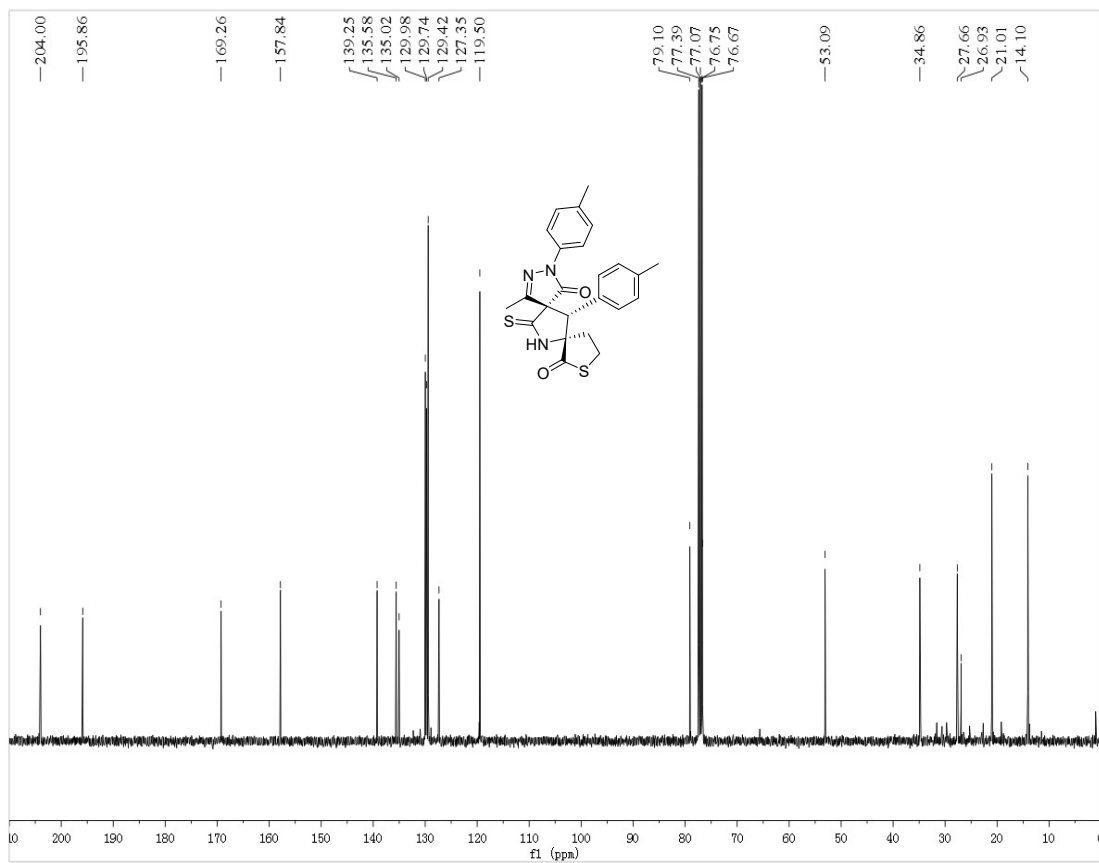

### HPLC of 3s

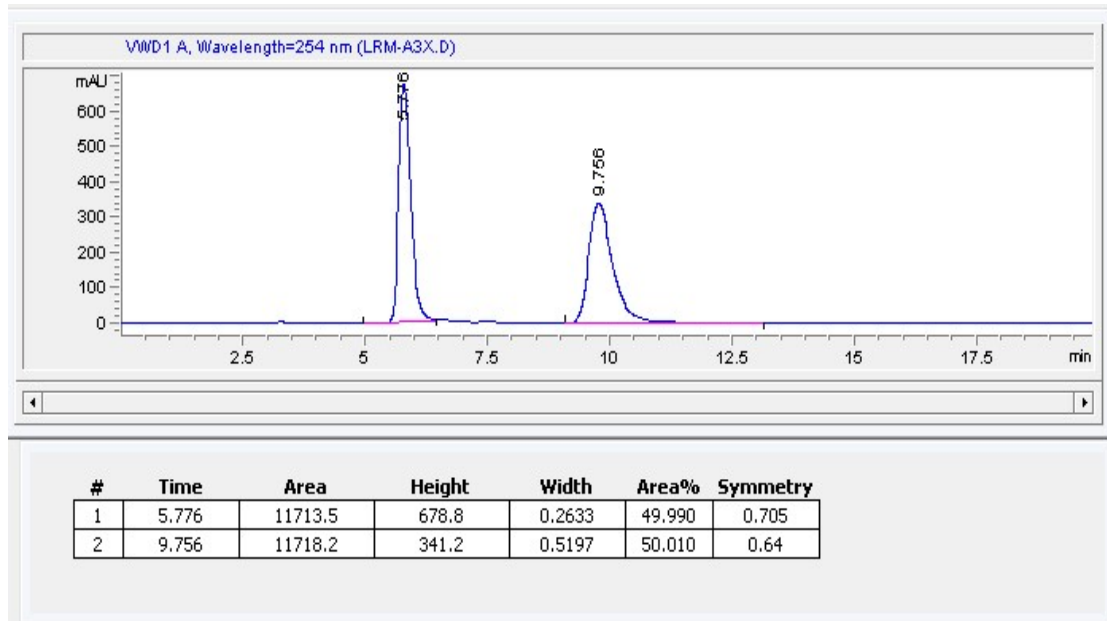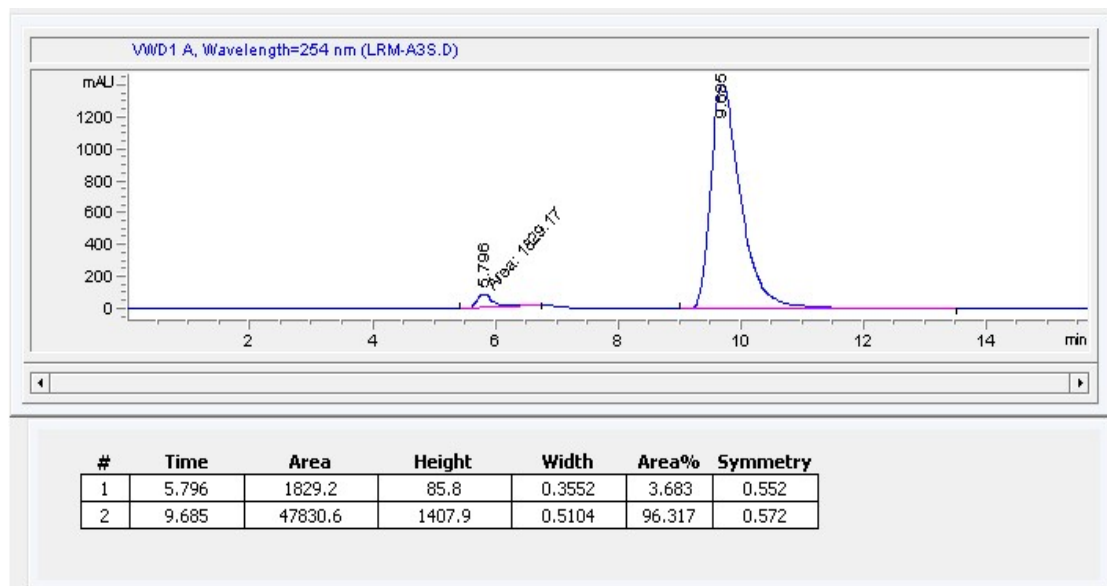

# <sup>1</sup>H and <sup>13</sup>C NMR of 3t

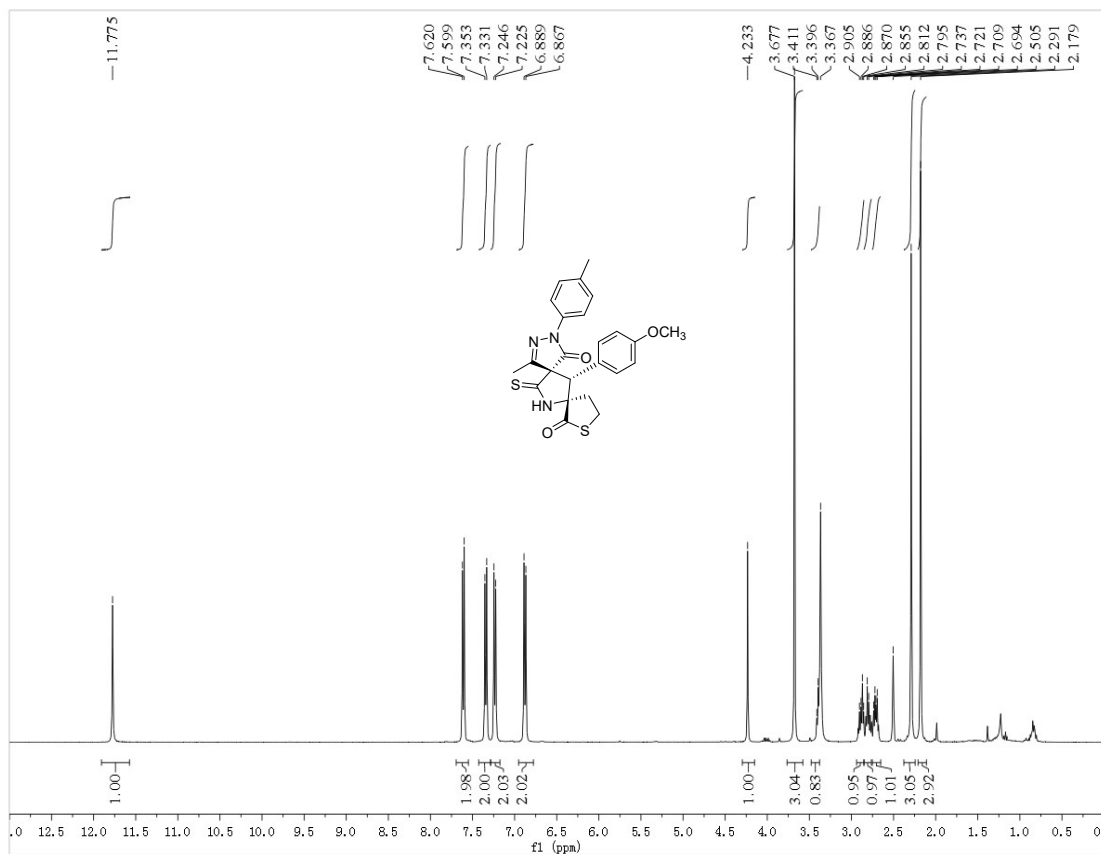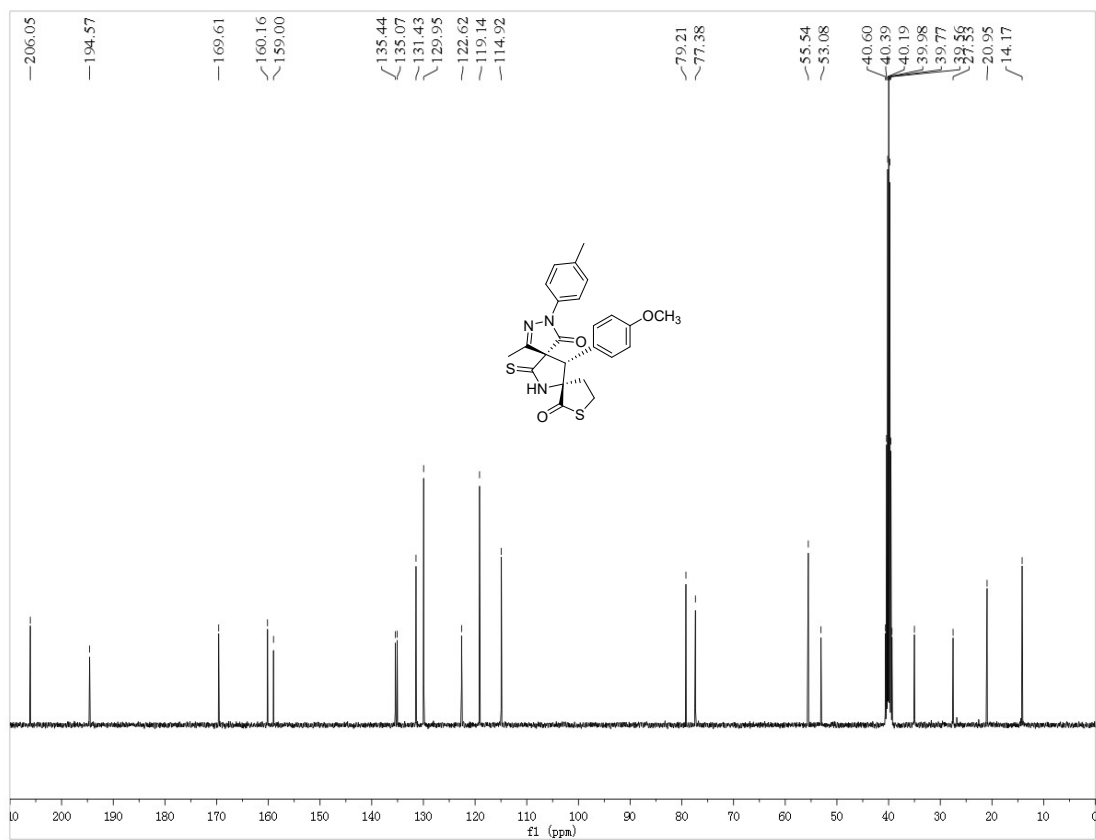

### HPLC of 3t

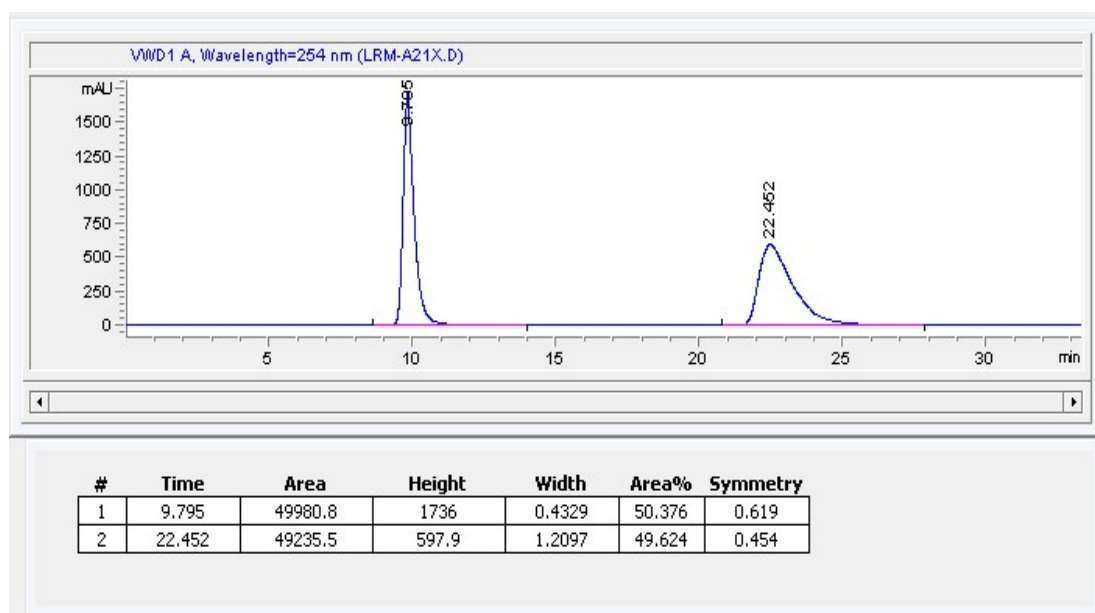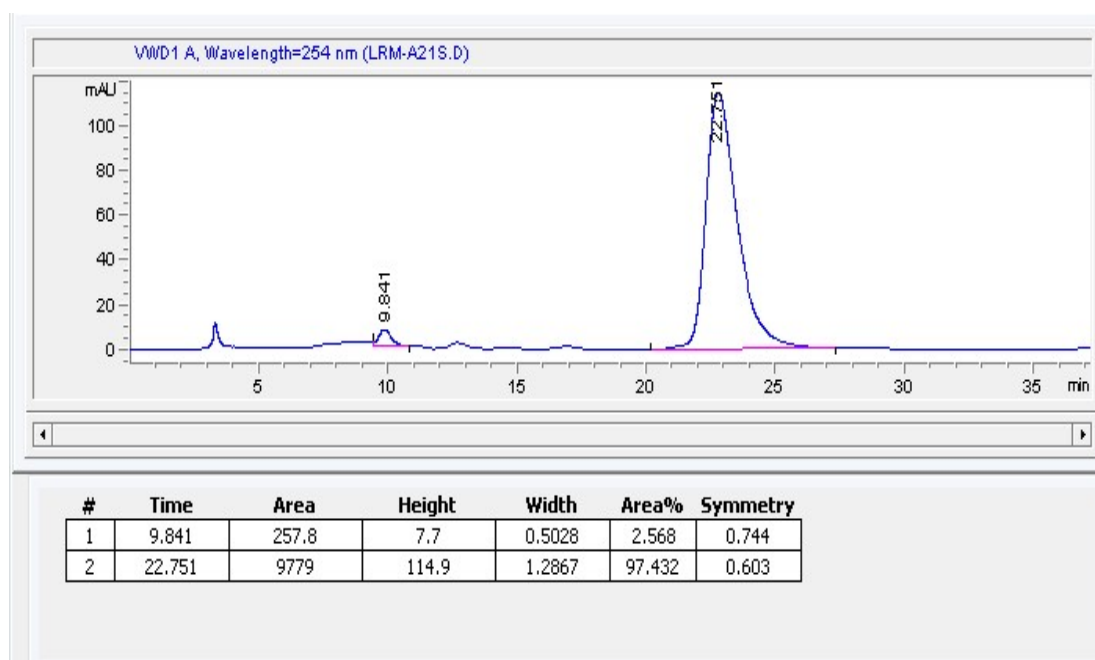

# <sup>1</sup>H and <sup>13</sup>C NMR of 3u

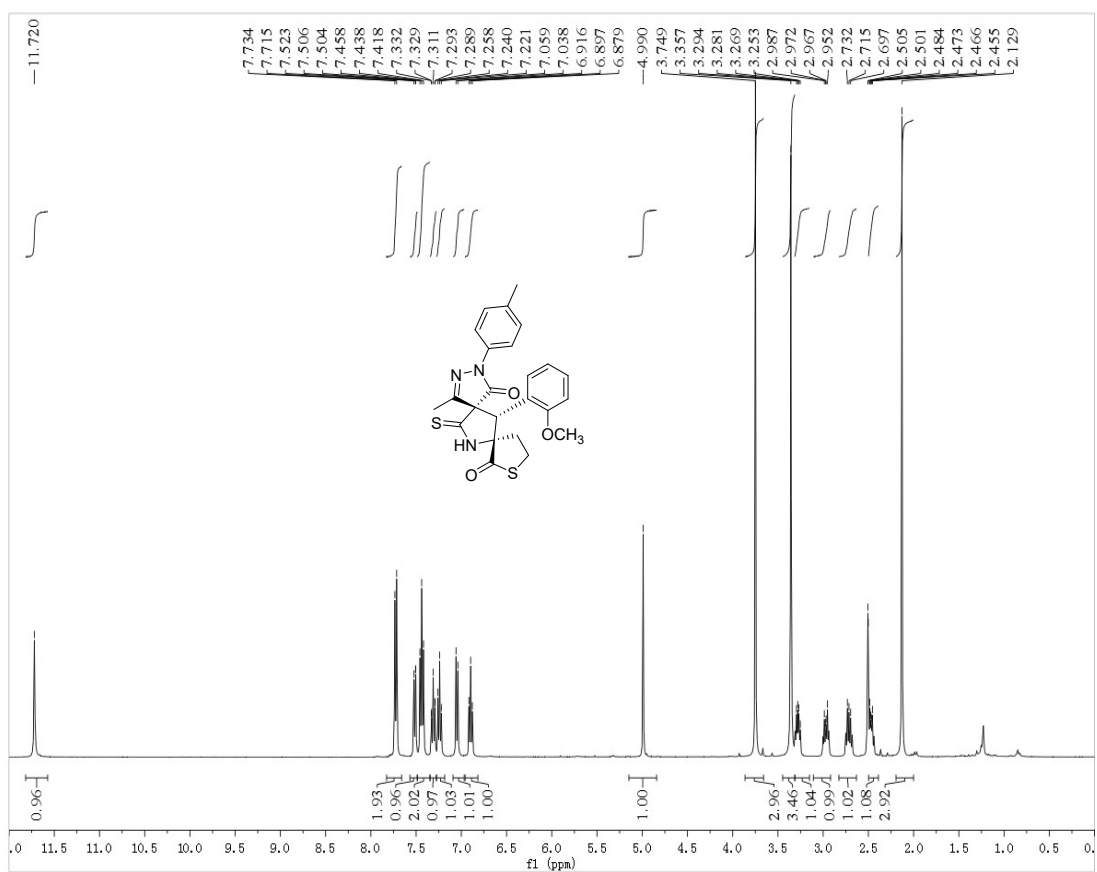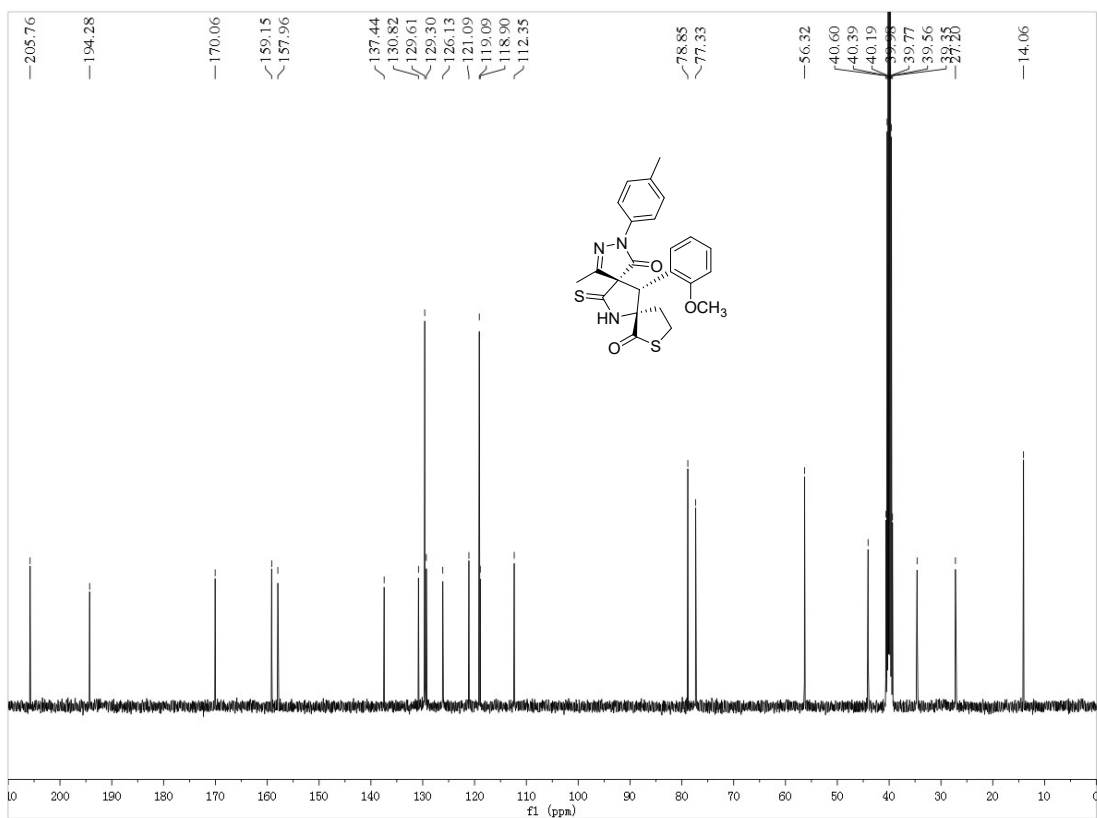

### HPLC of 3u

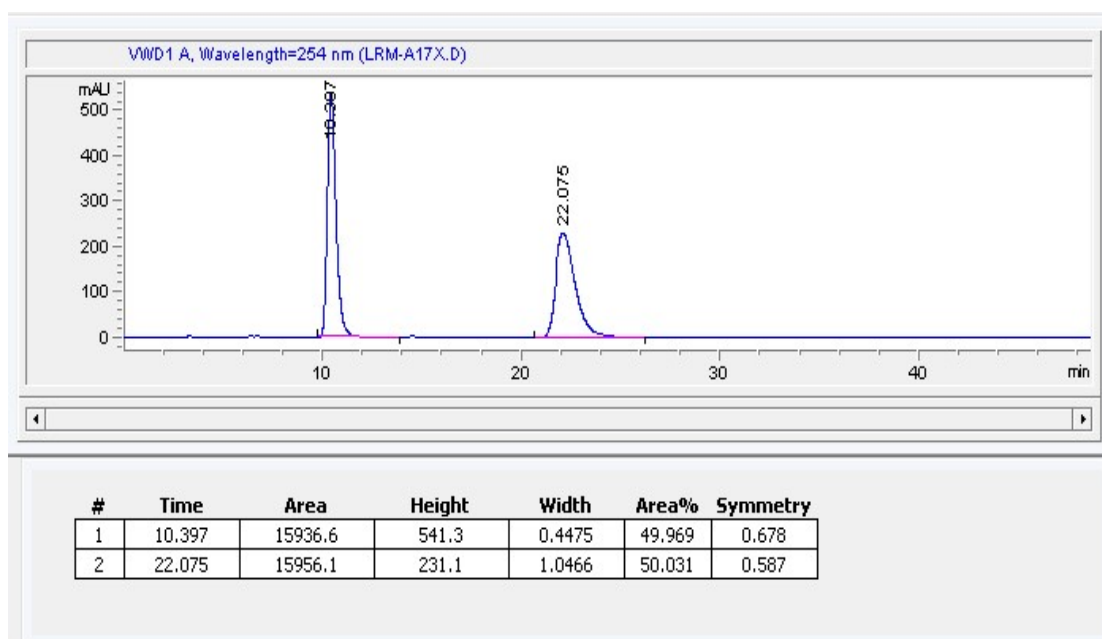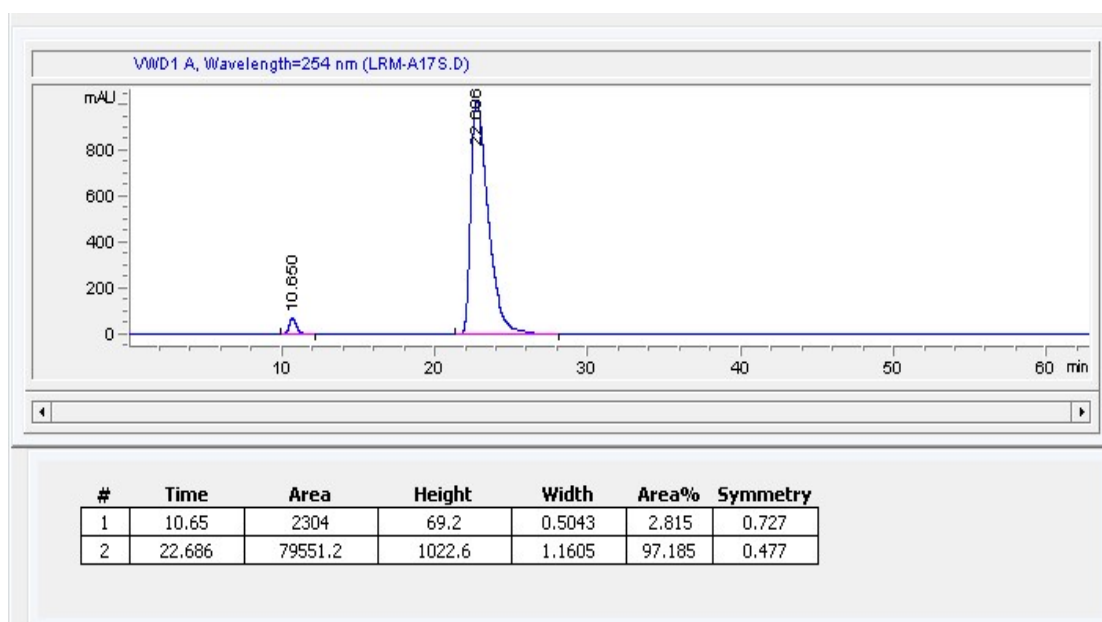

# <sup>1</sup>H and <sup>13</sup>C NMR of 3v

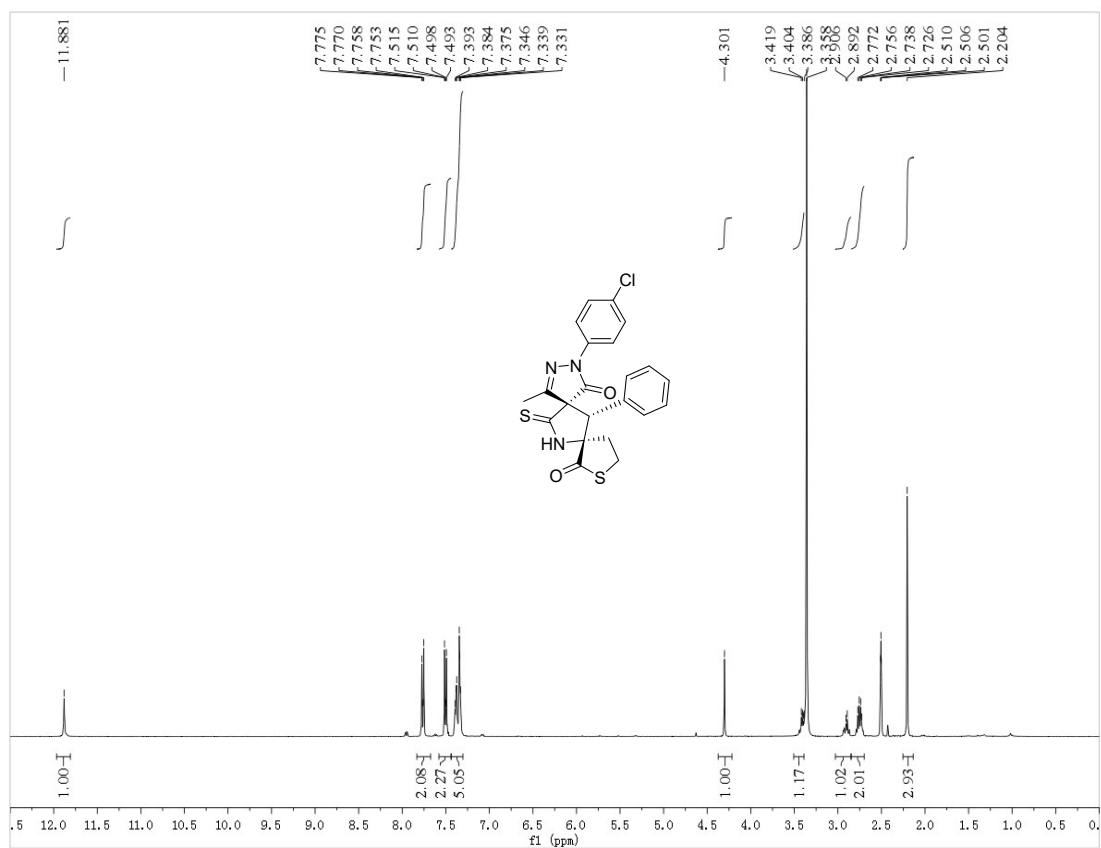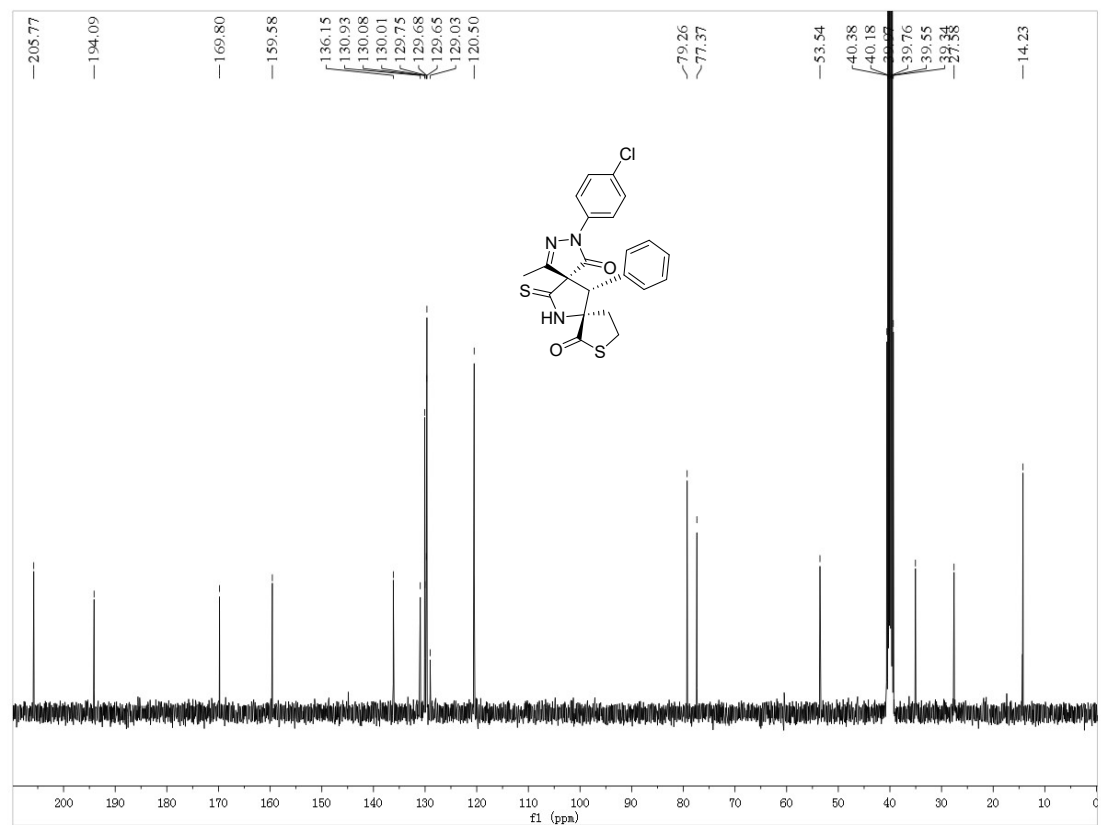

### HPLC of 3v

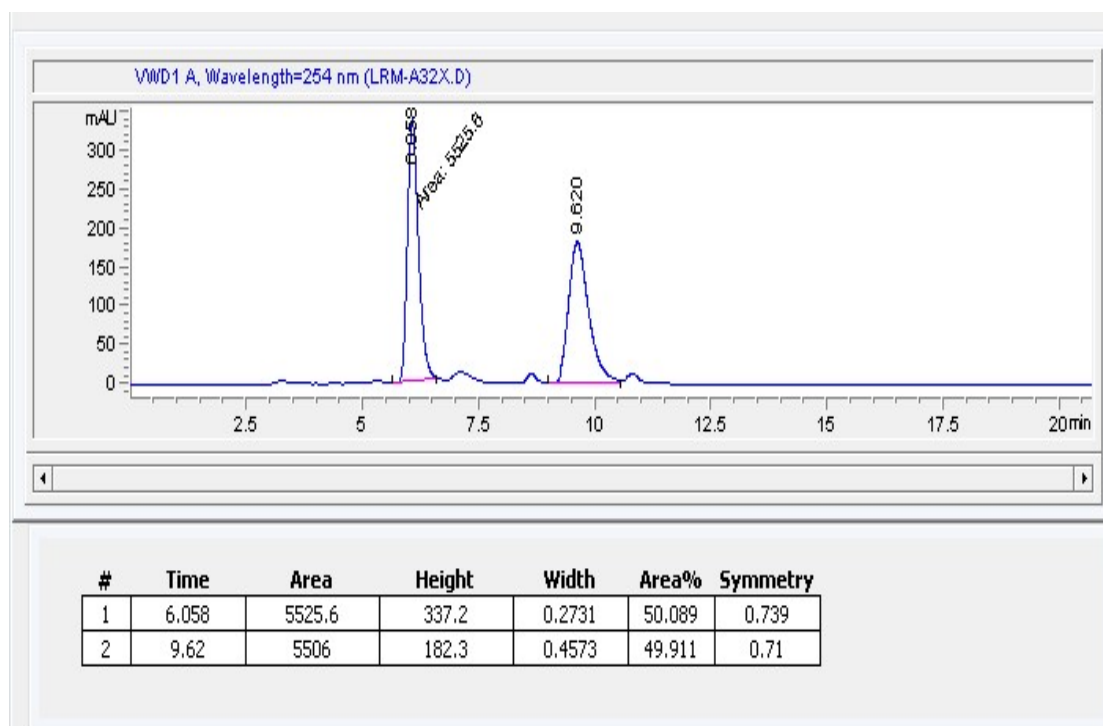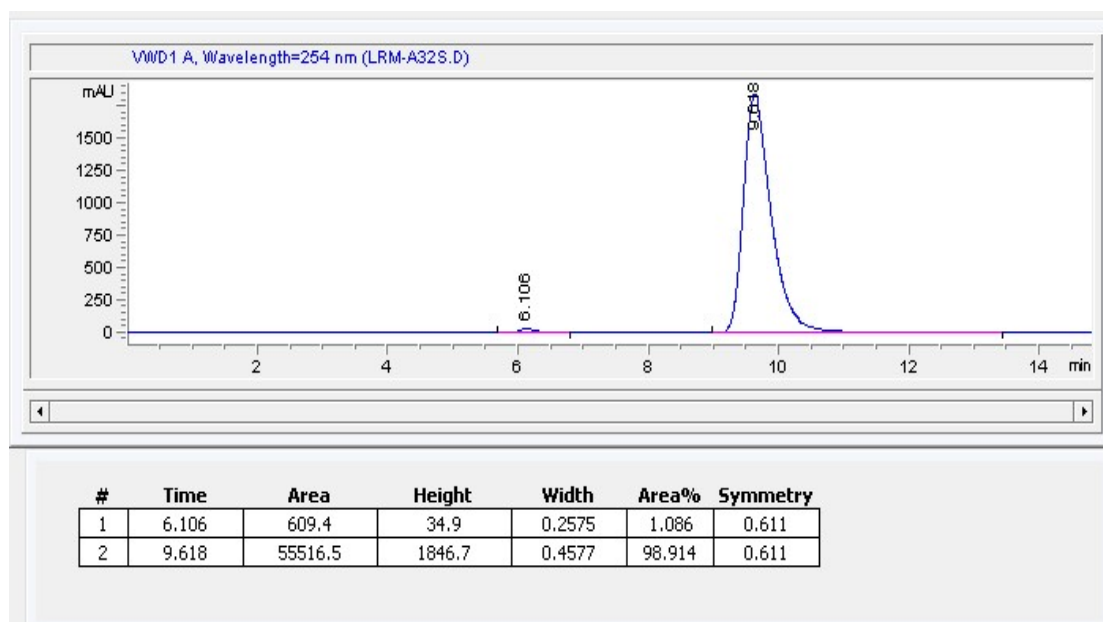



# <sup>1</sup>H and <sup>13</sup>C NMR of 3w

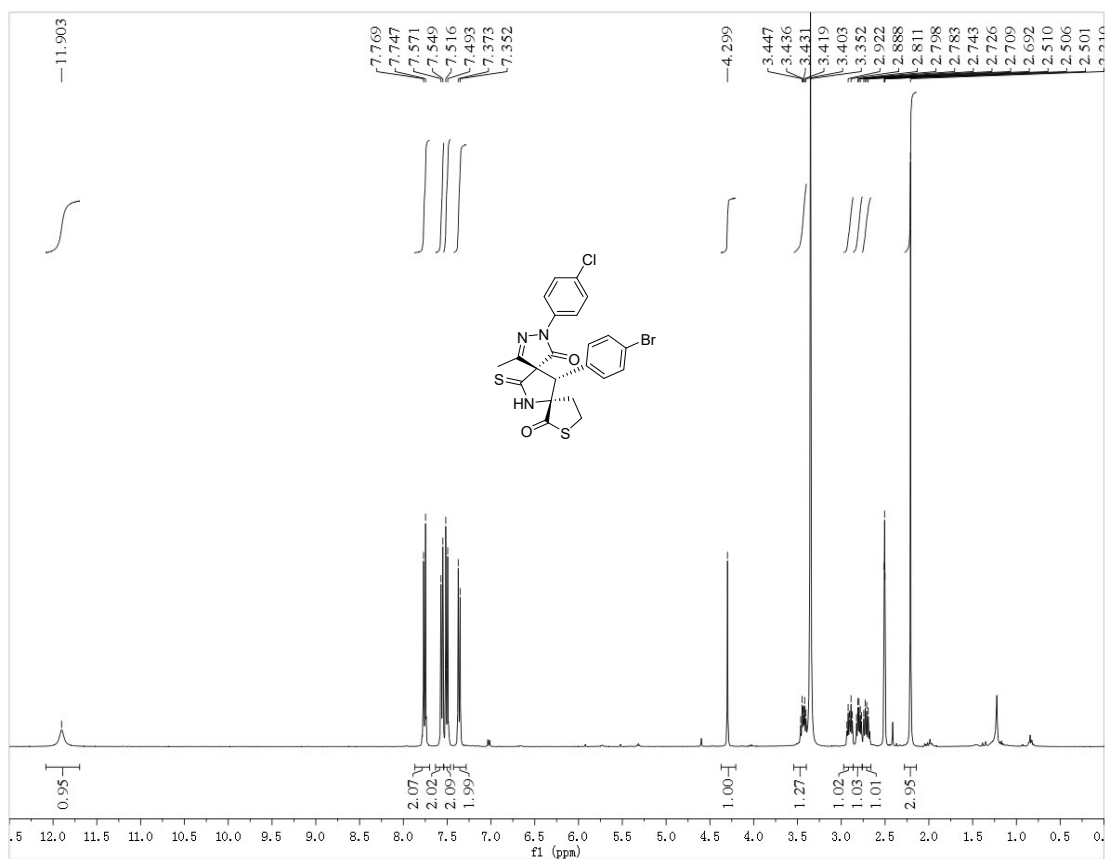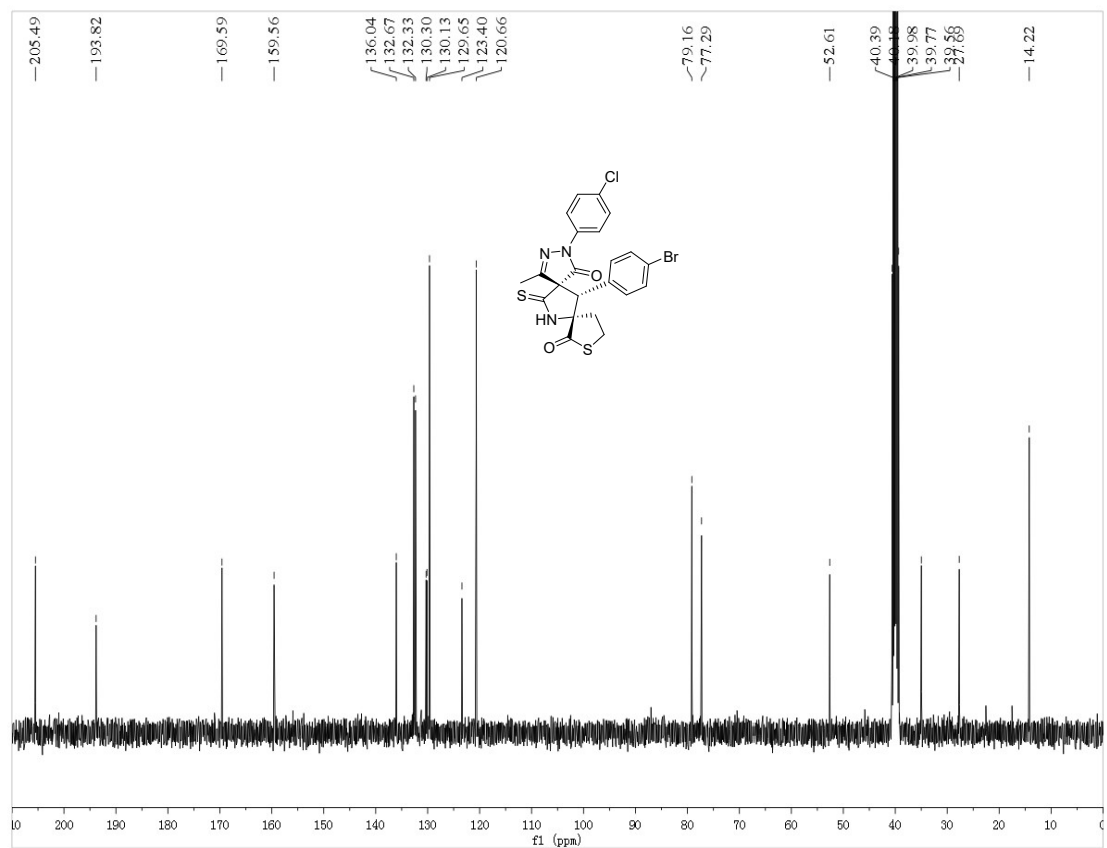

### HPLC of 3w

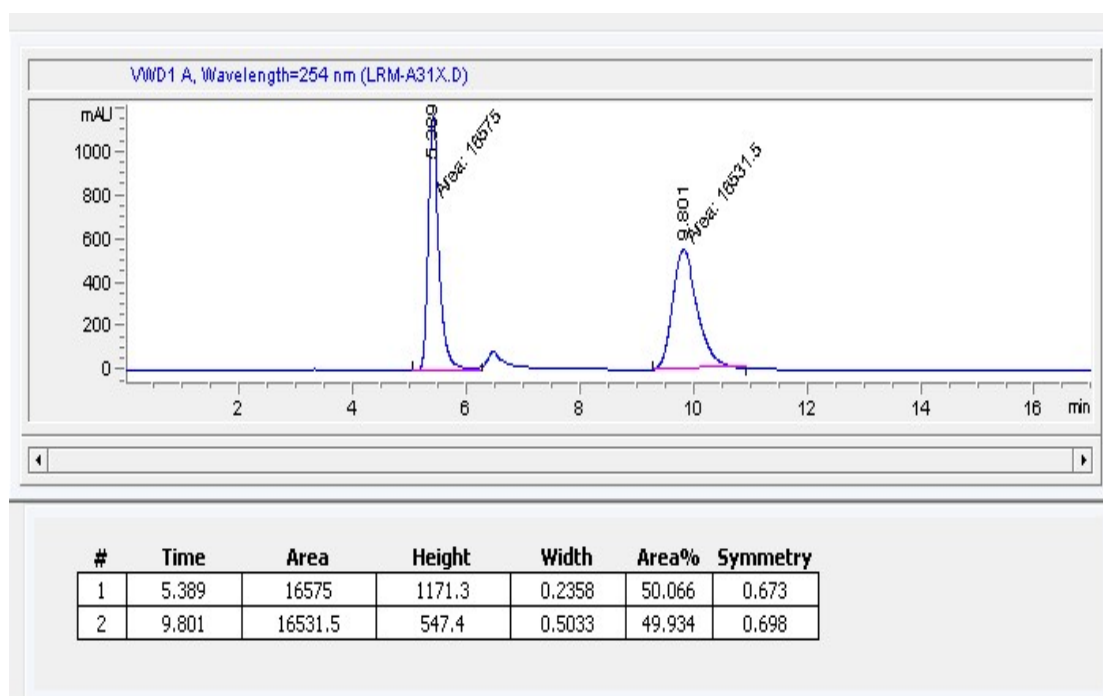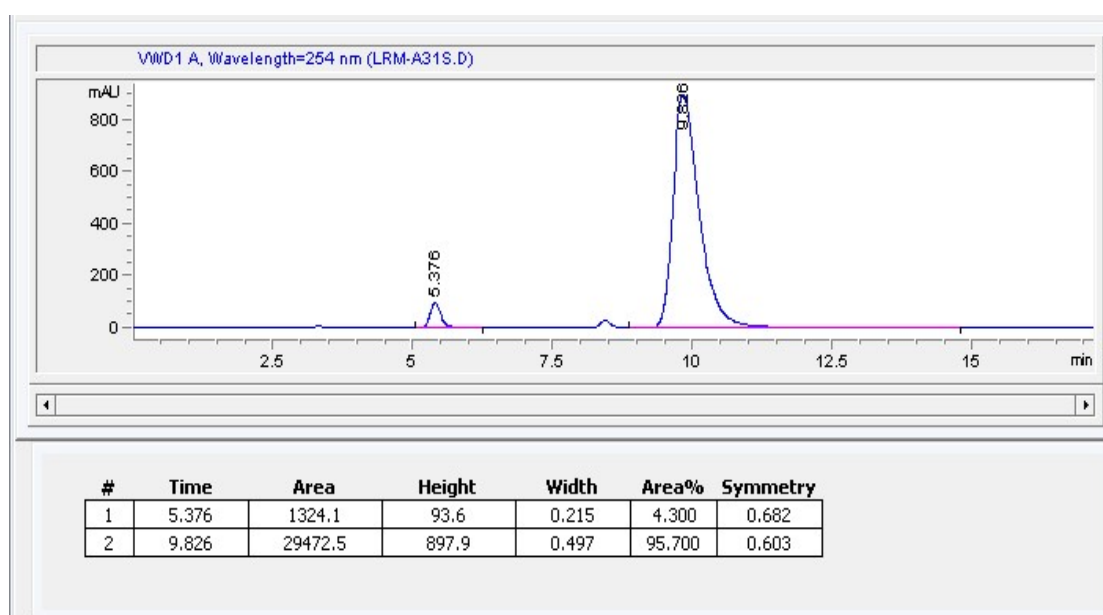

### <sup>1</sup>H and <sup>13</sup>C NMR of 3x

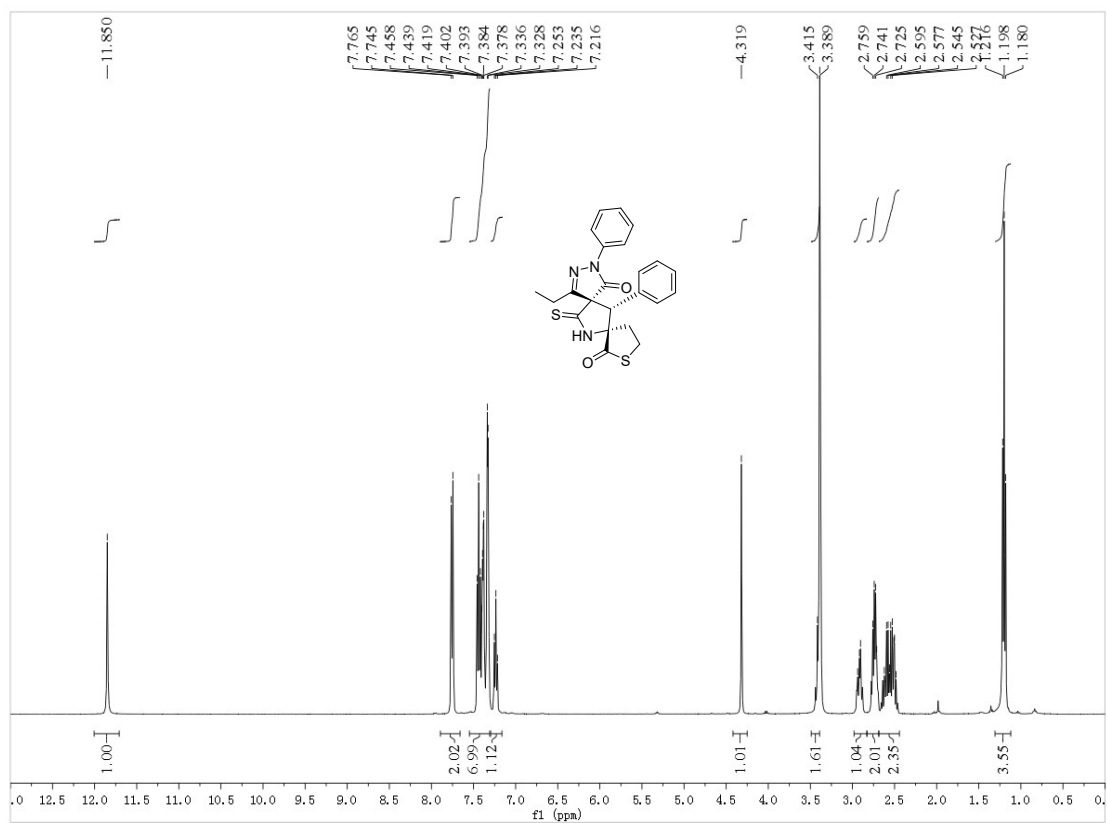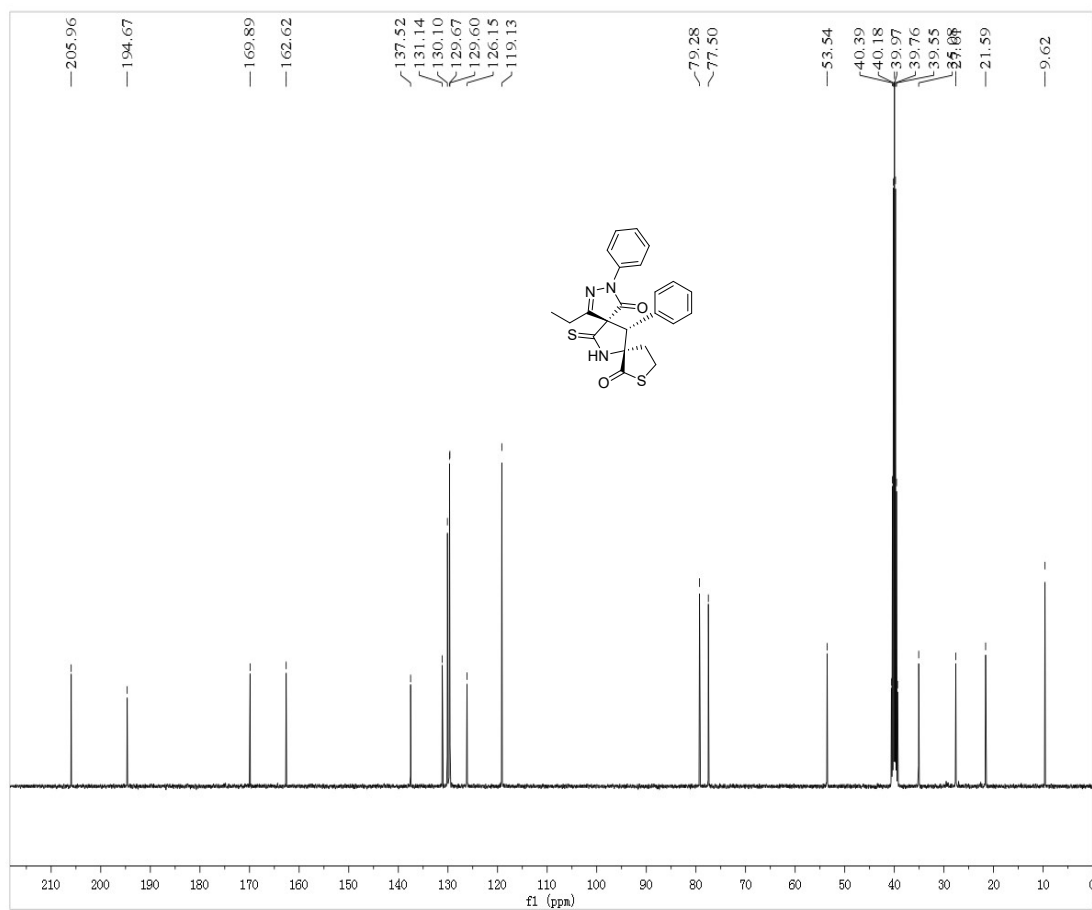

### HPLC of 3x

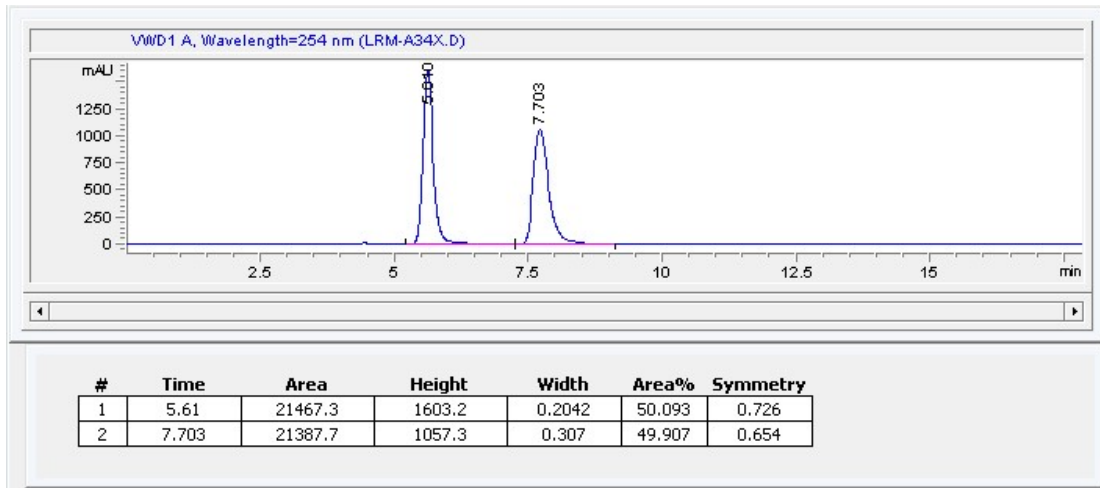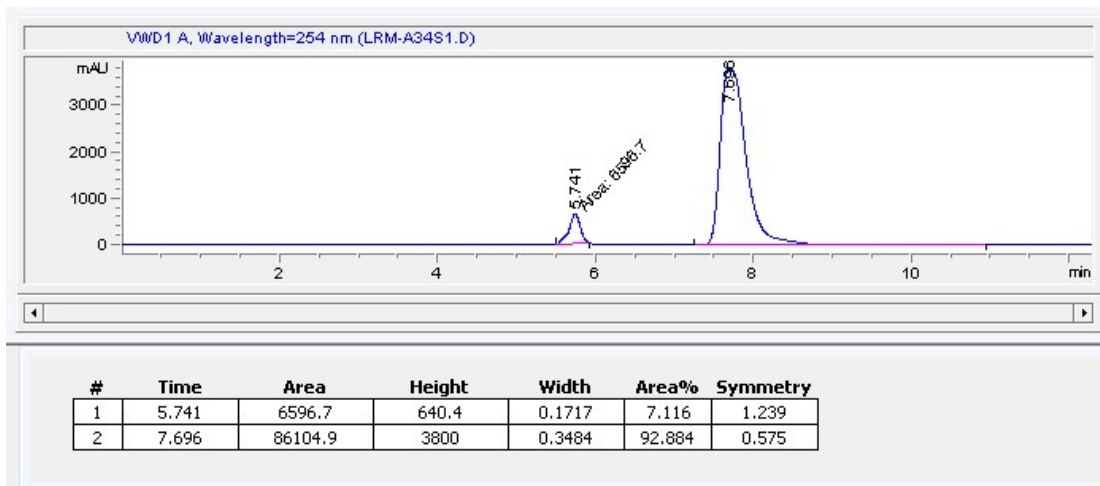

# <sup>1</sup>H and <sup>13</sup>C NMR of 3y

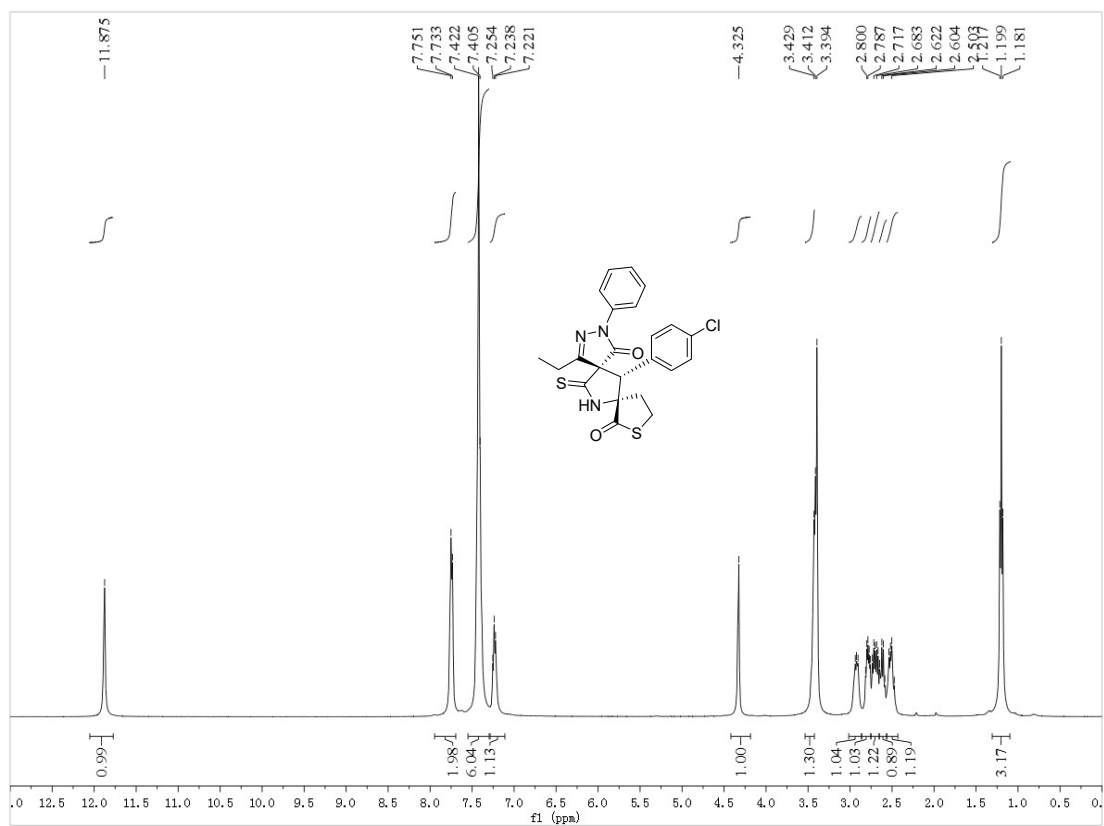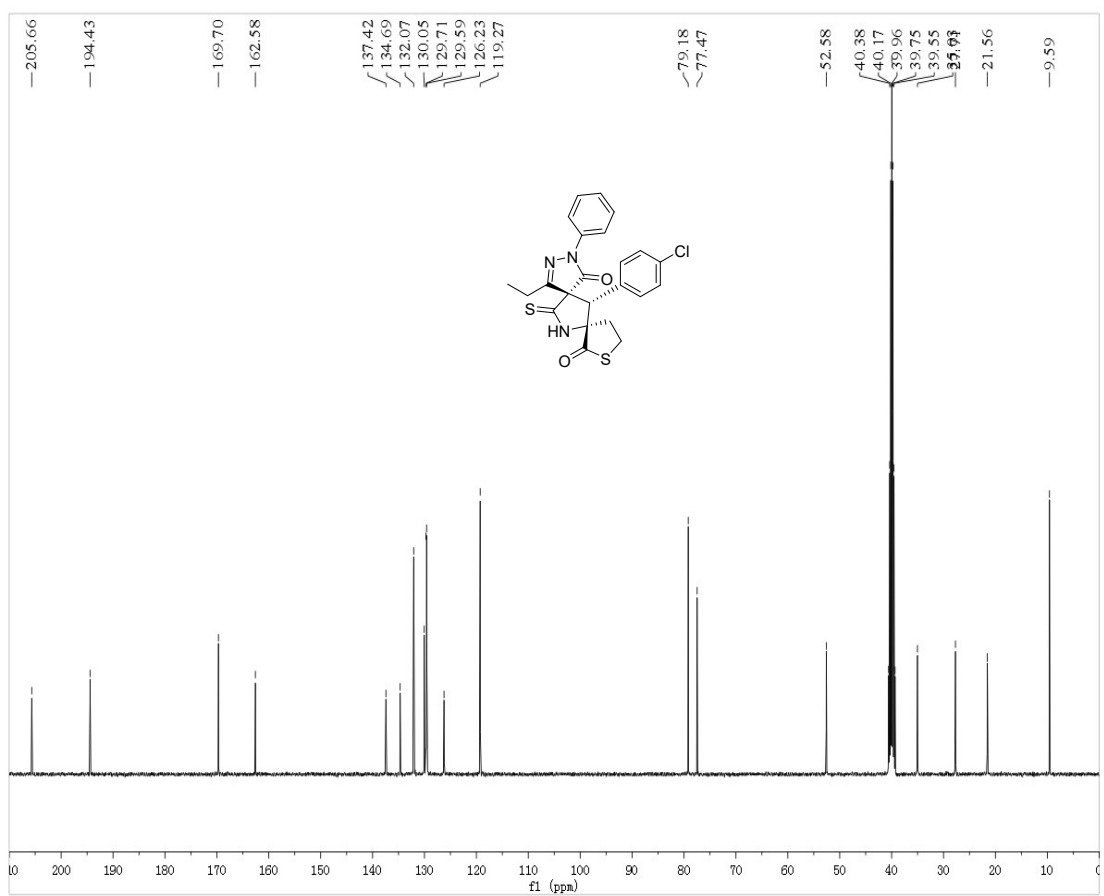

### HPLC of 3y

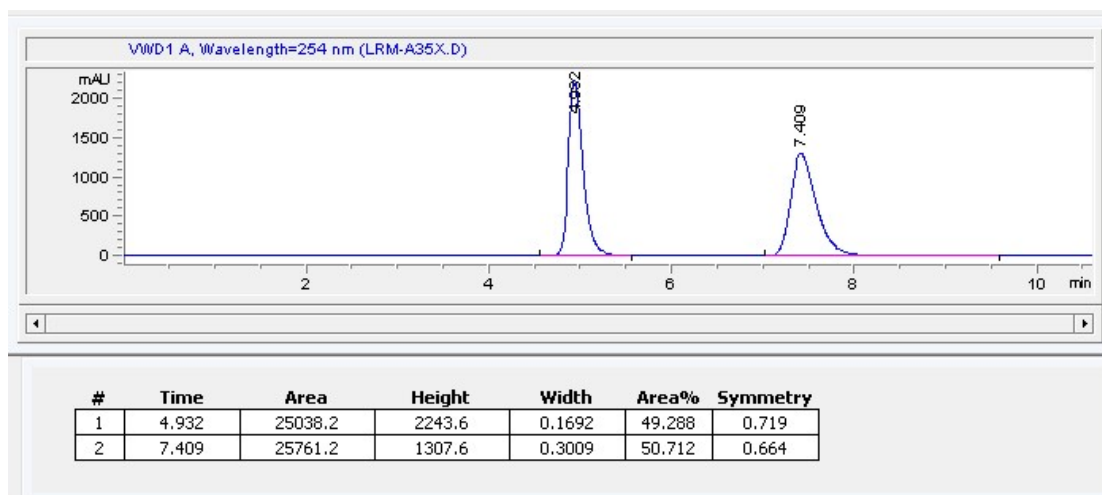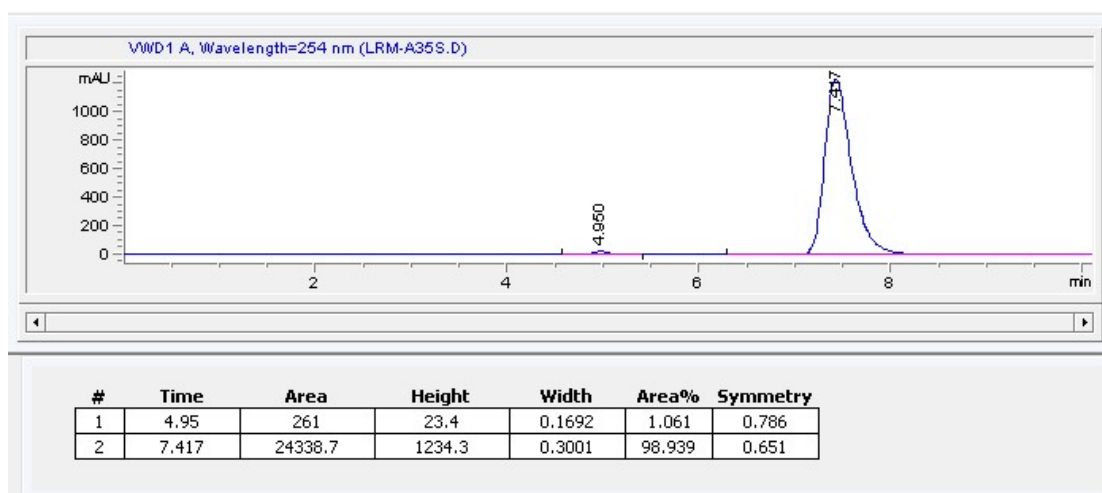

# <sup>1</sup>H and <sup>13</sup>C NMR of 4q

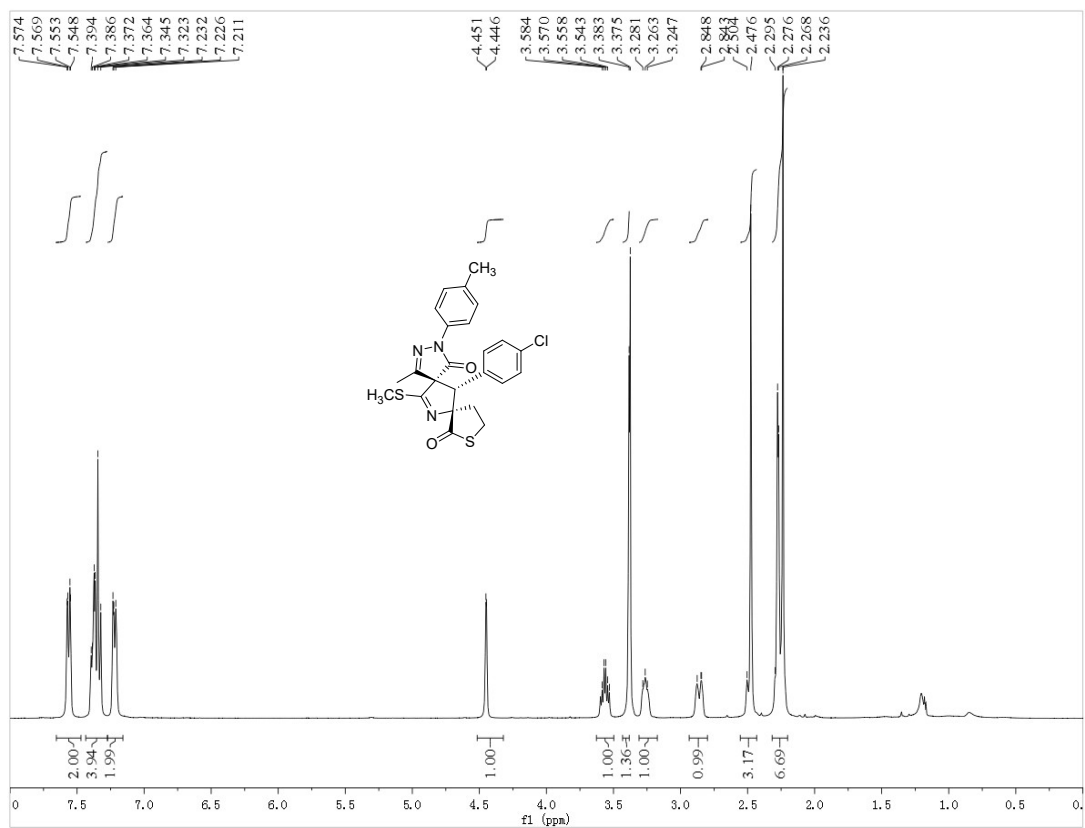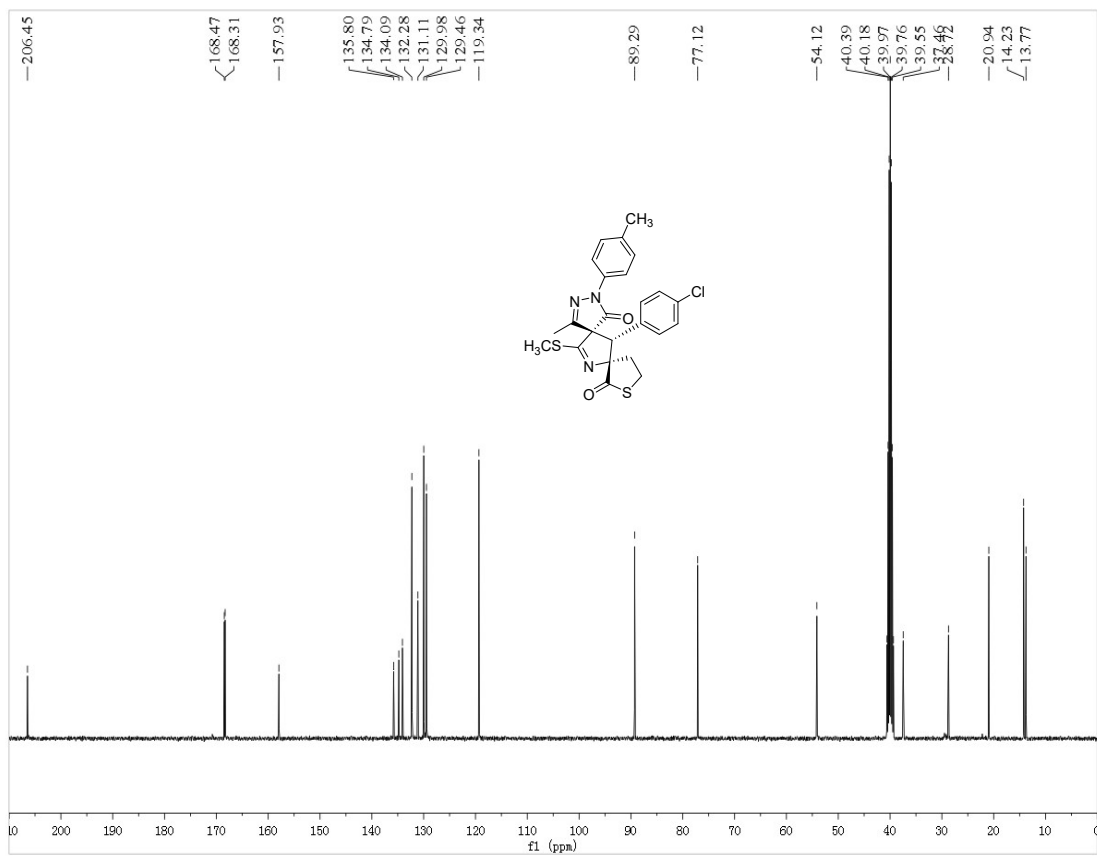

## HPLC of 4q

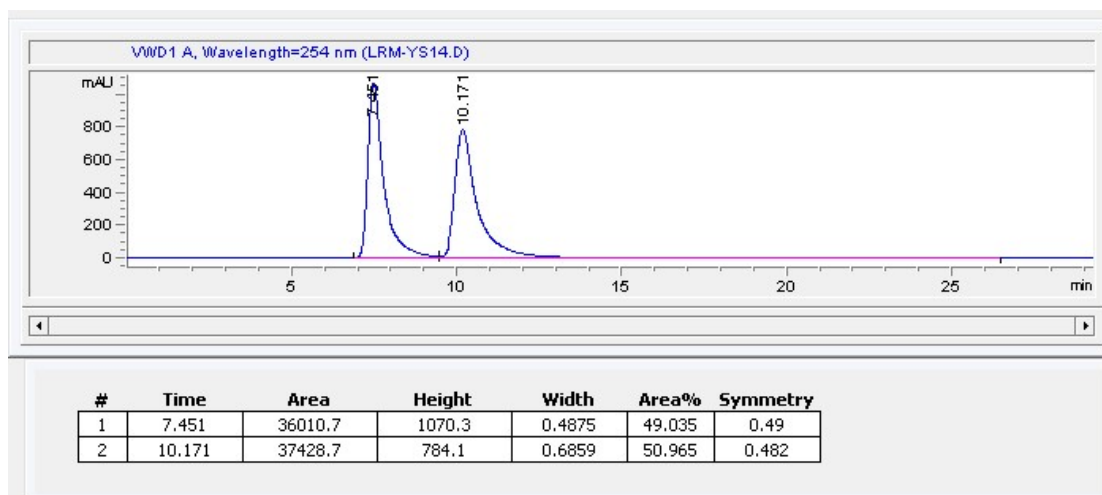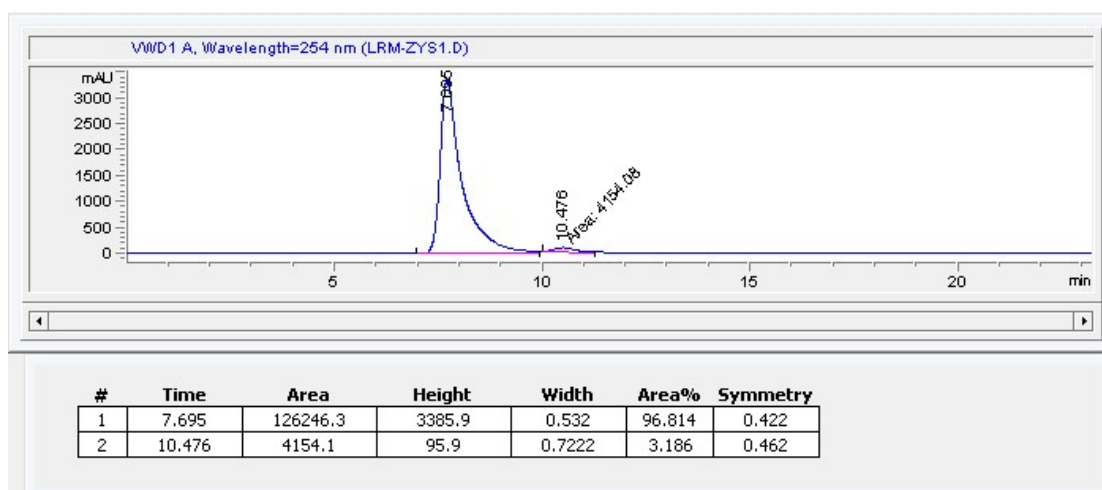

Supplement: d2ob00773h1.pdf [file d2ob00773h1.pdf]
